# Supplementary material for: A concise synthesis of quinolinium, and biquinolinium salts and biquinolines from benzylic azides and alkenes promoted by copper(ii) species
Source: Royal Society of Chemistry journal article supplement (doi:10.1039/c6ra11840b), 2016-01-01
Supplement: c6ra11840b1.pdf [file c6ra11840b1.pdf]

## Supporting Information

# **A Concise Synthesis of Quinolinium, and Biquinolinium Salts and Biquinolines from Benzylic Azides and Alkenes Promoted by Copper(II) Species**

*Wei-Chen Chen, Parthasarathy Gandeepan, Chia-Hung Tsai, Ching-Zong Luo,  
Pachaiyappan Rajamalli, and Chien-Hong Cheng\**

Department of Chemistry, National Tsing Hua University, Hsinchu 30013, Taiwan.

[chcheng@mx.nthu.edu.tw](mailto:chcheng@mx.nthu.edu.tw)

| <b>Table of Contents</b>                                                                                 | <b>Page No</b> |
|----------------------------------------------------------------------------------------------------------|----------------|
| General Procedures                                                                                       | S-2            |
| Table S1. Reaction Optimization Studies for the Synthesis of Quinolinium Salt <b>3aa</b>                 | S-4            |
| Table S2. Optimization studies for the Suitable Oxidant for the Synthesis of Quinolinium Salt <b>3aa</b> | S-6            |
| Table S3. Optimization of Lewis Acid Metal Catalyst for the Quinolinium Salt <b>3aa</b> Formation        | S-7            |
| Table S4. Optimization Studies for the Synthesis of Biquinolinium Salt <b>4ja</b>                        | S-8            |
| Deuterium Labeling Experiments                                                                           | S-9            |
| Reference                                                                                                | S-12           |
| <sup>1</sup> H and <sup>13</sup> C NMR and HRMS Data                                                     | S-13           |
| <sup>1</sup> H and <sup>13</sup> C NMR Spectra                                                           | S-25           |
| X-Ray Data of <b>3af'</b> , <b>4ja</b> , and <b>5ka</b>                                                  | S-49           |

**General.** All reactions were conducted under nitrogen atmosphere on a dual-manifold Schlenk line unless otherwise mentioned and in oven-dried glass wares. Benzyl azides were synthesized according to the literature procedures. Other reagents were commercially available and used as purchased.

### General Procedure for the Synthesis of Benzylic Azides **1**<sup>1</sup>

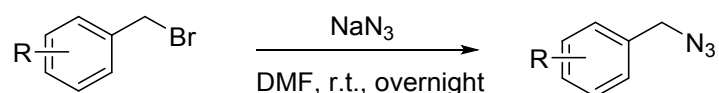

Substituted benzyl bromide (1.0 equiv.) and sodium azide (1.5 equiv.) were dissolved in DMF (2.0 mL/mmol) and stirred at room temperature for overnight. At the end of the reaction, the mixture was diluted with water and extracted with diethyl ether. The combined organic solution was concentrated in vacuo and the mixture was purified by a silica gel column (*n*-hexane/EtOAc, 90:10) to afford the substituted benzyl azide.

### General Procedure for the Synthesis of Quinolinium Salts **3**

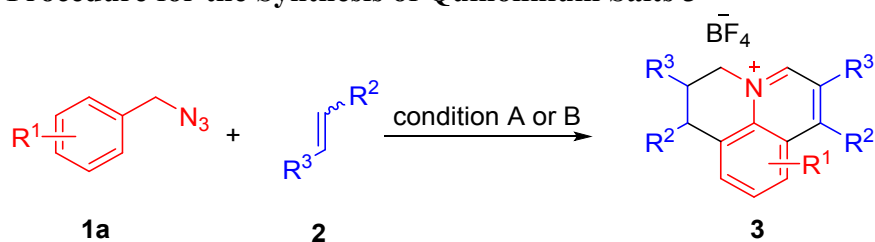

**Condition A:** A sealed tube that contained CuSO<sub>4</sub> (178 mg, 1.12 mmol) and NaBF<sub>4</sub> (24 mg, 0.2 mmol) was evacuated and purged with nitrogen gas three times. MeNO<sub>2</sub> (2.0 mL) was then added to the tube, and the suspension was stirred for 2 min at ambient temperature. Then, benzylic azide **1** (0.64 mmol), alkene **2** (0.32 mmol), H<sub>2</sub>O (40 μL, 2.22 mmol), and additional MeNO<sub>2</sub> (1 mL) were added to the system via syringe sequentially. The reaction was stirred at 100°C for 24 h. At the end of the reaction, the mixture was diluted with CH<sub>2</sub>Cl<sub>2</sub> (10 mL), filtered through a Celite pad, and washed three times with CH<sub>2</sub>Cl<sub>2</sub> (3 × 20 mL). The combined filtrate was concentrated in vacuo and the mixture was purified by a silica gel column using DCM/MeOH (95:5) as eluent to afford the desired pure product **3**.

**Condition B:** A sealed tube that contained CuSO<sub>4</sub> (13 mg, 0.080 mmol), NaBF<sub>4</sub> (24 mg, 0.20 mmol) and (NH<sub>4</sub>)<sub>2</sub>S<sub>2</sub>O<sub>8</sub> (92 mg, 0.40 mmol) was evacuated and purged with nitrogen gas three times. MeNO<sub>2</sub> (2.0 mL) was then added to the tube, and the suspension was stirred for 2 min at ambient temperature. Then, benzylic azide **1** (0.64 mmol), alkene **2** (0.32 mmol), H<sub>2</sub>O (40 μL, 2.22 mmol) and additional MeNO<sub>2</sub> (1 mL)

were added to the system via syringe sequentially. The reaction was stirred at 100 °C for 24 h. At the end of the reaction, the mixture was diluted with CH<sub>2</sub>Cl<sub>2</sub> (10 mL), filtered through a Celite pad, and washed three times with CH<sub>2</sub>Cl<sub>2</sub> (3 × 20 mL). The combined filtrate was concentrated in vacuo and the mixture was purified by a silica gel column using DCM/MeOH (95:5) as eluent to afford the desired pure product **3**.

#### General Procedure for the Synthesis of Biquinolinium Salts **4**

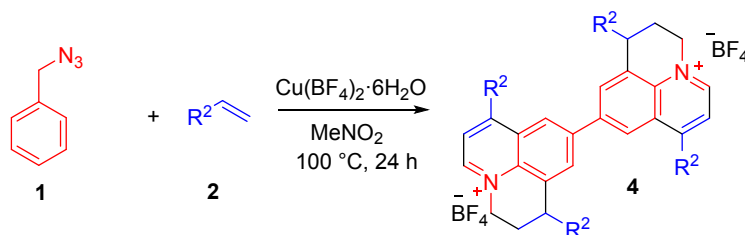

A sealed tube containing Cu(BF<sub>4</sub>)<sub>2</sub>·6H<sub>2</sub>O (276 mg, 0.80 mmol) was dissolved in MeNO<sub>2</sub> (2 mL) under nitrogen gas. Then, benzylic azide **1** (0.64 mmol), alkene **2** (0.32 mmol) and additional MeNO<sub>2</sub> (1 mL) were added to the system via syringe sequentially. The reaction was allowed to stir at 100 °C for 24 h. When the reaction was completed, the mixture was diluted with CH<sub>2</sub>Cl<sub>2</sub> (10 mL) and filtered through a Celite pad and washed several times with CH<sub>2</sub>Cl<sub>2</sub> (50 mL). The combined filtrate was concentrated in vacuo and the residue was purified by column chromatography on a silica gel column using DCM/MeOH (95:5) as eluent to afford the desired pure product **4**.

#### General Procedure for the Synthesis of Substituted Biquinolines **5**

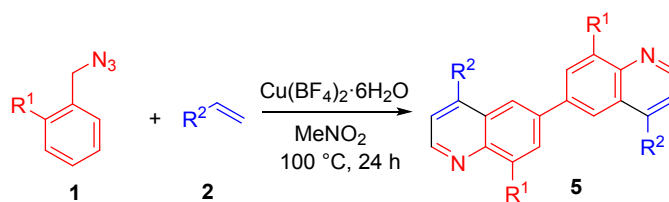

A sealed tube containing Cu(BF<sub>4</sub>)<sub>2</sub>·6H<sub>2</sub>O (276 mg, 0.80 mmol) was dissolved in MeNO<sub>2</sub> (2 mL) under nitrogen gas. Then, benzyl azide **1** (0.64 mmol), alkene **2** (0.32 mmol) and additional MeNO<sub>2</sub> (1 mL) were added to the system via syringe sequentially. The reaction was allowed to stir at 100 °C for 24 h. When the reaction was completed, the mixture was diluted with CH<sub>2</sub>Cl<sub>2</sub> (10 mL) and filtered through a Celite pad and washed several times with CH<sub>2</sub>Cl<sub>2</sub> (50 mL). The combined filtrate was concentrated in vacuo and the residue was purified by column chromatography on a silica gel column using *n*-hexane /Ethyl acetate (95:5) as eluent to afford the desired pure product **5**.



**Table S1. (Continued)**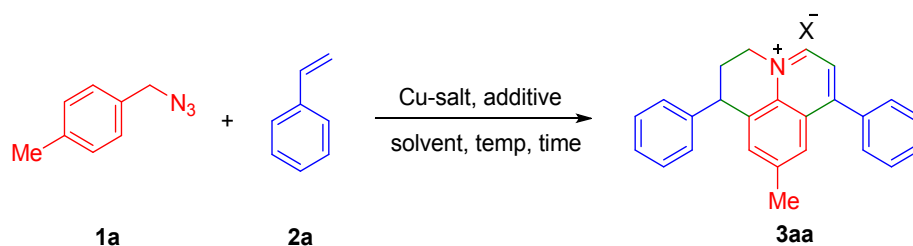

| Entry | Cu Salt (mmol)           | Additive (mmol)                                    | Solvent           | Temp. (°C) | Time (h) | Yield (%) <sup>b</sup> |
|-------|--------------------------|----------------------------------------------------|-------------------|------------|----------|------------------------|
| 28    | CuSO <sub>4</sub> (1.12) | NaBF <sub>4</sub> (0.2)<br>H <sub>2</sub> O (2.56) | MeNO <sub>2</sub> | 100        | 24       | 80                     |

<sup>a</sup>All reactions were performed using **1a** (0.64 mmol), **2a** (0.32 mmol), Cu-salt, H<sub>2</sub>O (2.22 mmol) and additive in MeNO<sub>2</sub> (3 mL) at 80-100 °C for 8-24 h. <sup>b</sup>Yields were calculated based on **2a** (0.16 mmol) as the limiting reagent; Yields were determined by <sup>1</sup>H NMR integration method using mesitylene as the internal standard. <sup>c</sup>Reaction was conducted using **1a** (0.48 mmol) and **2a** (0.32 mmol).

**Table S2.** Optimization studies for the Suitable Oxidant for the Synthesis of Quinolinium Salt **3aa**<sup>a</sup>

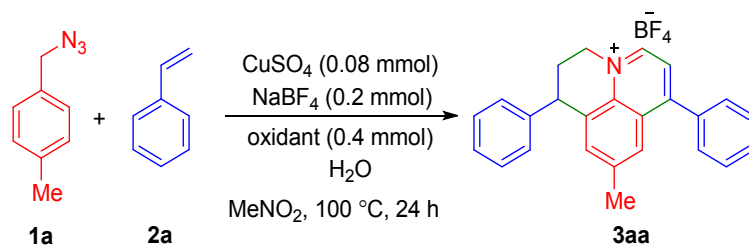

| Entry | Oxidant (mmol)                        | $\text{H}_2\text{O}$ (mmol) | <b>3aa</b> Yield (%) <sup>b</sup> |
|-------|---------------------------------------|-----------------------------|-----------------------------------|
| 1     | $(\text{NH}_4)_2\text{S}_2\text{O}_8$ | --                          | 47                                |
| 2     | $(\text{NH}_4)_2\text{S}_2\text{O}_8$ | 1.67                        | 60                                |
| 3     | $(\text{NH}_4)_2\text{S}_2\text{O}_8$ | 2.22                        | 82 (77)                           |
| 4     | $(\text{NH}_4)_2\text{S}_2\text{O}_8$ | 2.78                        | 51                                |
| 5     | $\text{K}_2\text{S}_2\text{O}_8$      | 2.22                        | 22                                |
| 6     | $\text{Na}_2\text{S}_2\text{O}_8$     | 2.22                        | 36                                |
| 7     | oxone                                 | 2.22                        | 10                                |
| 8     | DTBP                                  |                             | --                                |
| 9     | $\text{PhI}(\text{OAc})_2$            |                             | --                                |
| 10    | 1 atm $\text{O}_2$                    |                             | 40                                |

<sup>a</sup>All reactions were conducted using **1a** (0.64 mmol), **2a** (0.32 mmol),  $\text{CuSO}_4$  (0.8 mmol),  $\text{NaBF}_4$  (0.2 mmol), oxidant (0.4 mmol), and  $\text{H}_2\text{O}$  (used as shown in the Table) in  $\text{MeNO}_2$  (3 mL) at 100 °C for 24 h. <sup>b</sup>Yields were determined by  $^1\text{H}$  NMR integration methods using mesitylene as the internal standard. DTBP - di-*tert*-butyl peroxide. Yield given in the parenthesis was isolated yield.

**Table S3.** Optimization of Lewis Acid Metal-Catalyst for the Quinolinium salt **3aa** Formation<sup>a</sup>

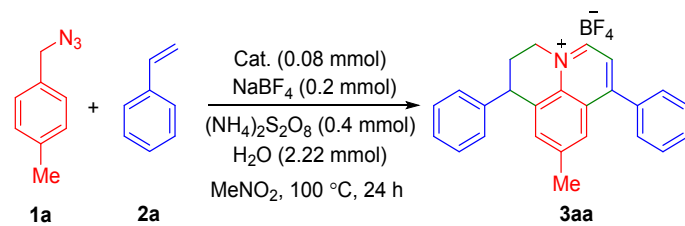

| Entry | Metal Catalyst                                  | <b>3aa</b> Yield (%) <sup>b</sup> |
|-------|-------------------------------------------------|-----------------------------------|
| 1     | CuSO <sub>4</sub>                               | 82                                |
| 2     | FeCl <sub>3</sub>                               | 61                                |
| 3     | FeBr <sub>3</sub>                               | 73                                |
| 4     | Fe <sub>2</sub> (SO <sub>4</sub> ) <sub>3</sub> | 40                                |
| 5     | Fe(acac) <sub>3</sub>                           | 19                                |
| 6     | Fe(ClO <sub>4</sub> ) <sub>3</sub>              | 56                                |
| 7     | FeCl <sub>2</sub>                               | 47                                |
| 8     | InCl <sub>3</sub>                               | 49                                |
| 9     | In(OTf) <sub>3</sub>                            | 22                                |

<sup>a</sup>Reaction conditions: **1a** (0.64 mmol), **2a** (0.32 mmol), metal catalyst (0.08 mmol), (NH<sub>4</sub>)<sub>2</sub>S<sub>2</sub>O<sub>8</sub> (0.4 mmol), NaBF<sub>4</sub> (0.2 mmol), and H<sub>2</sub>O (2.22 mmol) in MeNO<sub>2</sub> (3 mL) at 100 °C for 24 h. <sup>b</sup>Yields were determined by <sup>1</sup>H NMR method using mesitylene as the internal standard.

**Table S4.** Optimization Studies for the Synthesis of Biquinolinium Salt **4ja**<sup>a</sup>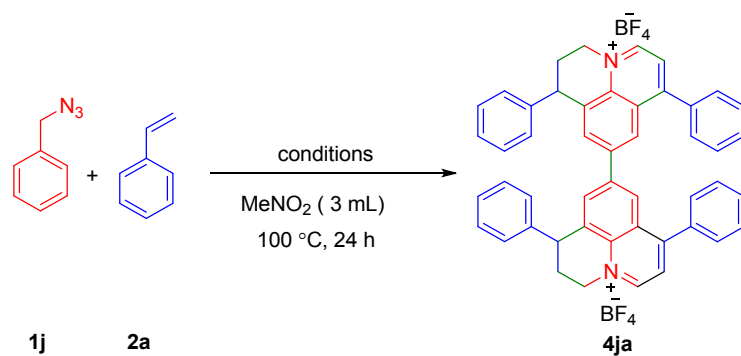

| Entry | Condition                                                                                       | Yield (%) <sup>b</sup> |
|-------|-------------------------------------------------------------------------------------------------|------------------------|
| 1     | CuSO <sub>4</sub> (1.12 mmol), NaBF <sub>4</sub> (0.2 mmol)                                     | 5                      |
| 2     | Cu(BF <sub>4</sub> ) <sub>2</sub> ·6H <sub>2</sub> O (0.64 mmol)                                | 68                     |
| 3     | Cu(BF <sub>4</sub> ) <sub>2</sub> ·6H <sub>2</sub> O (0.80 mmol)                                | 73 (70) <sup>c</sup>   |
| 4     | Cu(BF <sub>4</sub> ) <sub>2</sub> ·6H <sub>2</sub> O (0.64 mmol), CuSO <sub>4</sub> (0.16 mmol) | 66                     |
| 5     | Cu(BF <sub>4</sub> ) <sub>2</sub> ·6H <sub>2</sub> O (0.64 mmol), CuSO <sub>4</sub> (0.32 mmol) | 63                     |
| 6     | Cu(BF <sub>4</sub> ) <sub>2</sub> ·6H <sub>2</sub> O (0.96 mmol)                                | 70                     |

<sup>a</sup>All the reactions were conducted using **1j** (0.64 mmol), **2a** (0.32 mmol) with the conditions shown in the table. <sup>b</sup>Isolated yields are given based on **2a** (0.08 mmol) as the limiting reagent. <sup>c</sup>Yield given in the parenthesis was isolated yield.



## Deuterium Labeling Experiments

### Synthesis of 1-(azidomethyl-*d*)-4-methylbenzene (**D<sub>1</sub>-1a**)

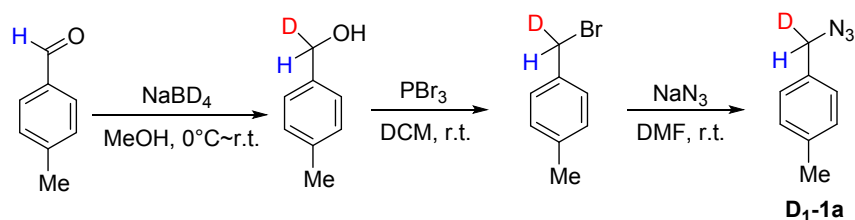

To a solution of 4-Methylbenzaldehyde (1.2 g, 10 mmol) in methanol (50 mL), NaBD<sub>4</sub> (630 mg, 20 mmol) was added slowly at 0 °C and stirred at room temperature for 3 h. Then, water (30 mL) was slowly added to the reaction mixture. The reaction mixture was extracted with diethyl ether (20 × 3) and the combined organic solution was dried over MgSO<sub>4</sub> and concentrated under reduced pressure. The crude product was directly used for next the step without purification.

To a solution of *p*-tolylmethan-*d*<sub>1</sub>-ol (1.23 g, 10 mmol) in DCM (100 mL) was added PBr<sub>3</sub> (5.4 g, 1.9 mL, 20 mmol) dropwise at room temperature. The mixture was stirred at room temperature for 15 h. The mixture was washed with ice water, dried over MgSO<sub>4</sub> and concentrated under reduced pressure to give 1-(bromomethyl-*d*)-4-methylbenzene in 90% yield.

1-(Bromomethyl-*d*<sub>1</sub>)-4-methylbenzene (9 mmol) and sodium azide (13.5 mmol) were dissolved in DMF (20 mL) and stirred at room temperature for overnight. At the end of the reaction, the mixture was diluted with water and extracted with diethyl ether. The combined organic solution was concentrated in vacuo and the mixture was purified by a silica gel column (*n*-hexane/EtOAc, 90:10) to afford the 1-(azidomethyl-*d*<sub>1</sub>)-4-methylbenzene (1.3 g, 98%). <sup>1</sup>H NMR (400 MHz, (CD<sub>3</sub>)<sub>2</sub>SO): δ 7.24-7.19 (m, 4 H), 4.28 (s, 1 H), 2.37 (s, 3 H); <sup>13</sup>C NMR (100 MHz, (CD<sub>3</sub>)<sub>2</sub>SO): δ 138.4 (C), 129.8 (2 CH), 129.5 (C), 128.5 (2 CH), 54.5 (t, *J* = 22 Hz, CD), 21.4 (CH<sub>3</sub>).

$^1\text{H}$  NMR spectra of 1-(azidomethyl- $d_1$ )-4-methylbenzene (**D<sub>1</sub>-1a**)

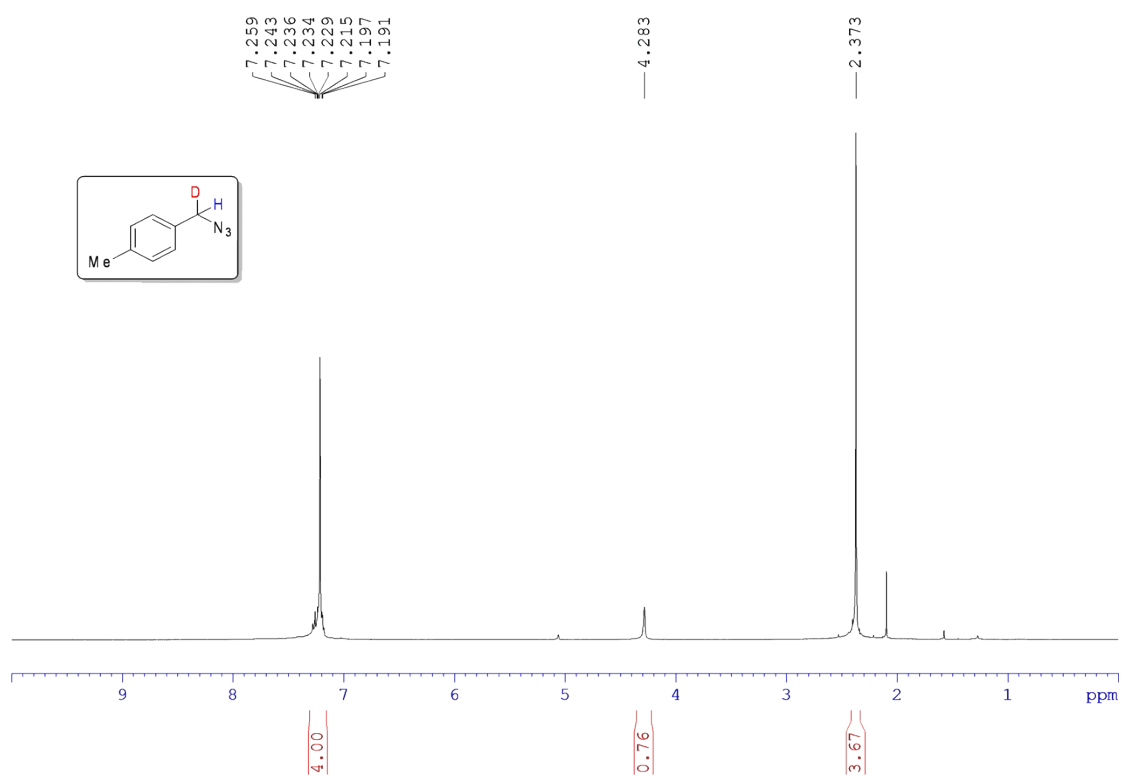

$^{13}\text{C}$  NMR spectra of 1-(azidomethyl- $d_1$ )-4-methylbenzene (**D<sub>1</sub>-1a**)

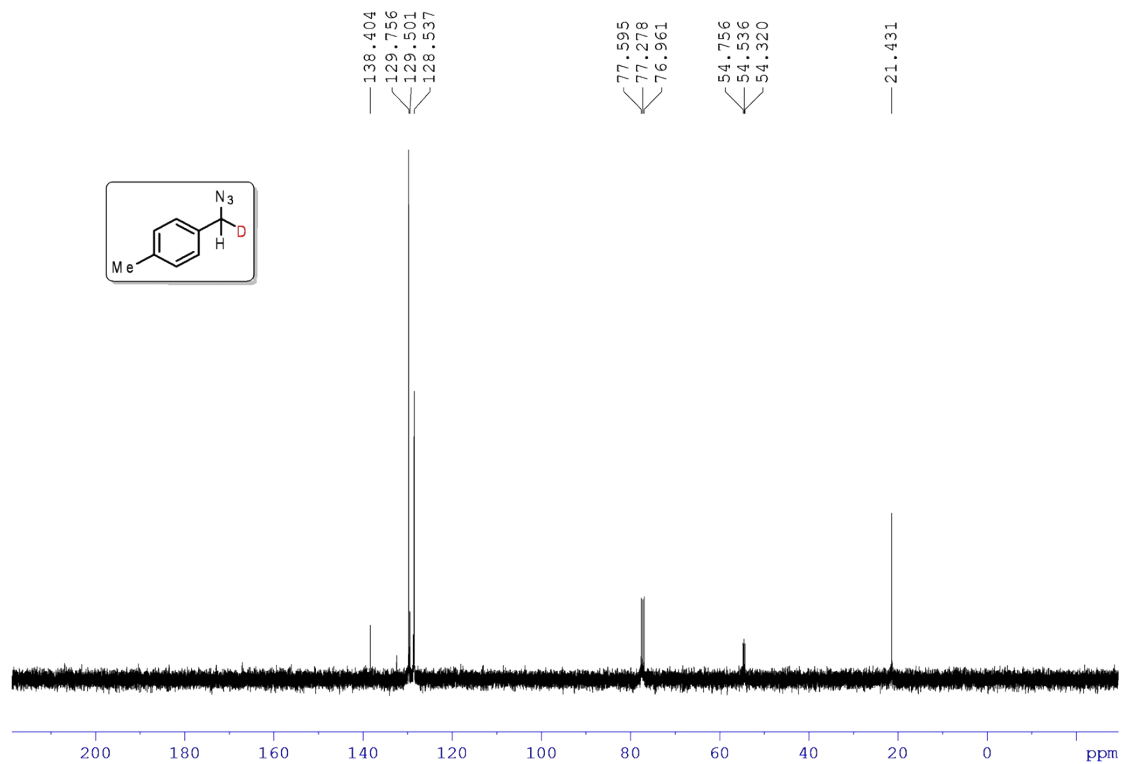

## Typical Procedure for the Synthesis of Quinolinium Salts **D<sub>2</sub>-3aa**

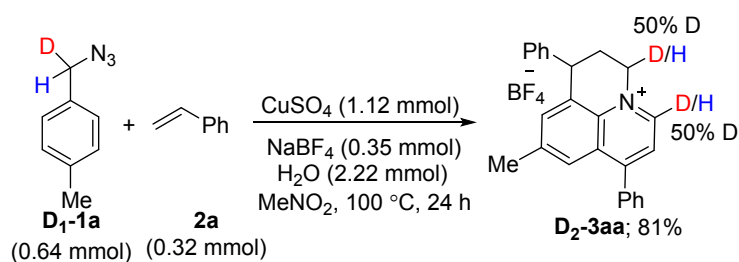

A sealed tube that contained  $\text{CuSO}_4$  (178 mg, 1.12 mmol) and  $\text{NaBF}_4$  (24 mg, 0.2 mmol) was evacuated and purged with nitrogen gas three times.  $\text{MeNO}_2$  (2.0 mL) was then added to the tube, and the suspension was stirred for 2 min at ambient temperature. Then, 1-(azidomethyl-*d*)-4-methylbenzene **D<sub>1</sub>-1a** (94.8 mg, 0.64 mmol), styrene **2a** (33.3 mg, 0.32 mmol),  $\text{H}_2\text{O}$  (40  $\mu\text{L}$ , 2.22 mmol), and additional  $\text{MeNO}_2$  (1 mL) were added to the system via syringe sequentially. The reaction was stirred at 100°C for 24 h. At the end of the reaction, the mixture was diluted with  $\text{CH}_2\text{Cl}_2$  (10 mL), filtered through a Celite pad, and washed three times with  $\text{CH}_2\text{Cl}_2$  (3  $\times$  20 mL). The combined filtrate was concentrated in vacuo and the mixture was purified by a silica gel column using DCM/MeOH (95:5) as eluent to afford the desired pure product **D<sub>2</sub>-3aa** (55mg, 81%).

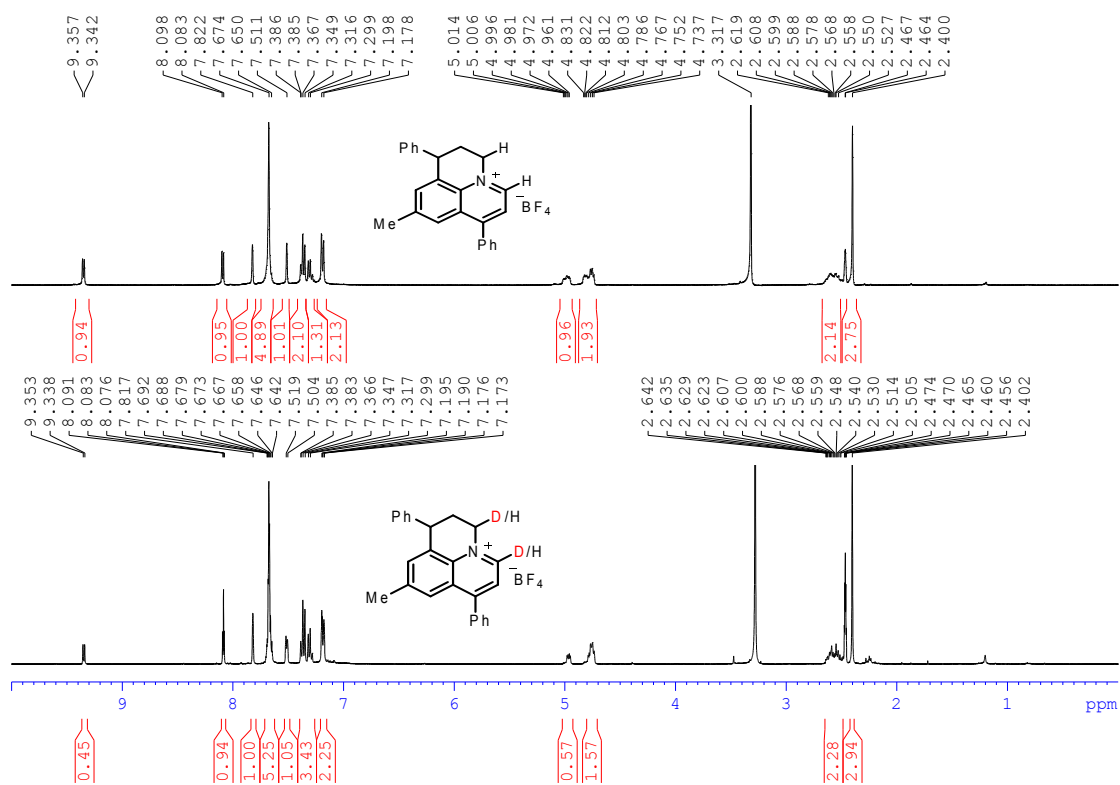

## Reference

- (1) C.-Z. Luo, P. Gandeepan, Y.-C. Wu, W.-C. Chen, C.-H. Cheng, *RSC Adv.* **2015**, *5*, 106012.

## <sup>1</sup>H and <sup>13</sup>C NMR and HRMS Data

### 9-Methyl-1,7-diphenyl-2,3-dihydro-1*H*-pyrido[3,2,1-*ij*]quinolin-4-ium tetrafluoroborate (3aa)

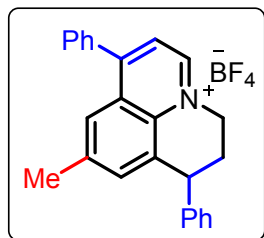

Brown solid; m.p. 141-144 °C; <sup>1</sup>H NMR (400 MHz, (CD<sub>3</sub>)<sub>2</sub>SO): δ 9.35 (d, *J* = 6.0 Hz, 1H), 8.09 (d, *J* = 6.0 Hz, 1 H), 7.82 (s, 1 H), 7.67 (s, 5 H), 7.51 (s, 1 H), 7.39-7.35 (m, 2 H), 7.32-7.30 (m, 1 H), 7.19 (d, *J* = 8.0 Hz, 2 H), 5.01-4.96 (m, 1 H), 4.83-4.74 (m, 2 H), 2.62-2.53 (m, 2 H), 2.40 (s, 3 H); <sup>13</sup>C NMR (100 MHz, (CD<sub>3</sub>)<sub>2</sub>SO): δ 156.8 (C), 146.6 (CH), 143.1 (C), 139.9 (C), 136.4 (CH), 135.3 (C), 134.8 (C), 132.7 (C), 130.4 (CH), 129.6 (2 CH), 129.2 (2 CH), 128.8 (2 CH), 128.6 (2 CH), 127.8 (C), 127.2 (CH), 125.1 (CH), 121.9 (CH), 53.8 (CH<sub>2</sub>), 41.7 (CH), 28.3 (CH<sub>2</sub>), 21.2 (CH<sub>3</sub>); <sup>11</sup>B NMR (160 MHz, (CD<sub>3</sub>)<sub>2</sub>SO) : δ -1.231; <sup>19</sup>F NMR (470 MHz, (CD<sub>3</sub>)<sub>2</sub>SO): δ -148.58, -148.64; HRMS (FAB) calcd for: C<sub>25</sub>H<sub>22</sub>N<sup>+</sup> 336.1747, found: 336.1751; IR (KBr, cm<sup>-1</sup>): 1612, 1057 (ν<sub>B-F</sub>), 764, 702.

### 9-Isopropyl-1,7-diphenyl-2,3-dihydro-1*H*-pyrido[3,2,1-*ij*]quinolin-4-ium tetrafluoroborate (3ba)

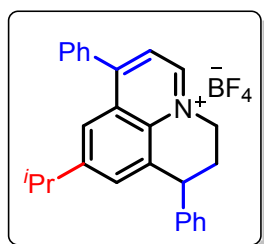

Brown solid; m.p. 120-122 °C; <sup>1</sup>H NMR (400 MHz, (CD<sub>3</sub>)<sub>2</sub>SO): δ 9.39 (d, *J* = 6.0 Hz, 1 H), 8.14 (d, *J* = 6.0 Hz, 1 H), 7.88 (s, 1 H), 7.72 (s, 5 H), 7.65 (s, 1 H), 7.42-7.39 (m, 2 H), 7.35 (d, *J* = 7.2 Hz, 1 H), 7.21 (d, *J* = 8.0 Hz, 2 H), 5.04-4.99 (m, 1 H), 4.82-4.79 (m, 2 H), 3.05 (quin, *J* = 7.2 Hz, 1 H), 2.67-2.57 (m, 2 H), 1.13 (t, *J* = 7.2 Hz, 6 H); <sup>13</sup>C NMR (100 MHz, (CD<sub>3</sub>)<sub>2</sub>SO): δ 157.0 (C), 149.7 (C), 146.7 (CH), 143.1 (C), 135.3 (C), 135.1 (C), 134.1 (CH), 133.0 (C), 130.5 (CH), 129.7 (2 CH), 129.2 (2 CH), 128.8 (2 CH), 128.5 (2 CH), 127.7 (C), 127.1 (CH), 122.4 (CH), 121.9 (CH), 53.7 (CH<sub>2</sub>), 41.8 (CH), 33.2 (CH), 28.3 (CH<sub>2</sub>), 23.1 (CH<sub>3</sub>), 23.0 (CH<sub>3</sub>); HRMS (FAB) calcd for: C<sub>27</sub>H<sub>26</sub>N<sup>+</sup> 364.2060, found: 364.2065; IR (KBr, cm<sup>-1</sup>): 2962, 1612, 1458, 1065 (ν

B-F), 764, 702.

**9-Methoxy-1,7-diphenyl-2,3-dihydro-1*H*-pyrido[3,2,1-*ij*]quinolin-4-ium tetrafluoroborate (3ca)**

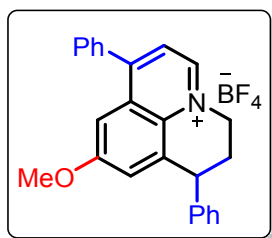

Brown solid; m.p. 161-163 °C;  $^1\text{H NMR}$  (400 MHz,  $(\text{CD}_3)_2\text{SO}$ ):  $\delta$  9.29 (d,  $J = 6.0$  Hz, 1 H), 8.11 (d,  $J = 6.0$  Hz, 1 H), 7.77-7.70 (m, 5 H), 7.43-7.39 (m, 2 H), 7.36-7.35 (m, 2 H), 7.25-7.23 (m, 3 H), 5.04-4.98 (m, 1 H), 4.88-4.82 (m, 1 H), 4.79-4.76 (m, 1 H), 3.78 (s, 3 H), 2.65-2.59 (m, 2 H);  $^{13}\text{C NMR}$  (100 MHz,  $(\text{CD}_3)_2\text{SO}$ ):  $\delta$  158.6 (C), 155.6 (C), 144.8 (CH), 142.6 (C), 135.4 (C), 135.3 (C), 132.2 (C), 130.5 (CH), 129.5 (C), 129.4 (2 CH), 129.3 (2 CH), 128.9 (2 CH), 128.5 (2 CH), 127.3 (CH), 125.9 (CH), 122.3 (CH), 104.5 (CH), 55.7 ( $\text{CH}_3$ ), 54.1. ( $\text{CH}_2$ ), 41.9 (CH), 28.0 ( $\text{CH}_2$ ); **HRMS (FAB)** calcd for:  $\text{C}_{25}\text{H}_{22}\text{NO}^+$  352.1696, found: 352.1699; **IR (KBr,  $\text{cm}^{-1}$ )**: 1612, 1450, 1041 ( $\nu_{\text{B-F}}$ ), 764, 702.

**1,7,9-Triphenyl-2,3-dihydro-1*H*-pyrido[3,2,1-*ij*]quinolin-4-ium tetrafluoroborate (3da)**

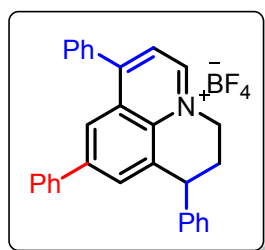

Yellow solid; m.p. 175-177 °C;  $^1\text{H NMR}$  (400 MHz,  $(\text{CD}_3)_2\text{SO}$ ):  $\delta$  9.48 (d,  $J = 6.0$  Hz, 1 H), 8.22-8.21 (m, 2 H), 8.00 (s, 1 H), 7.82-7.79 (m, 2 H), 7.77-7.73 (m, 3 H), 7.59-7.57 (m, 2 H), 7.50-7.39 (m, 5 H), 7.35-7.33 (m, 1 H), 7.28-7.26 (m, 2 H), 5.09-5.05 (m, 1 H), 4.94-4.85 (m, 2 H), 2.73-2.63 (m, 2 H);  $^{13}\text{C NMR}$  (100 MHz,  $(\text{CD}_3)_2\text{SO}$ ):  $\delta$  157.6 (C), 147.5 (CH), 143.1 (C), 140.7 (C), 137.7 (C), 135.7 (C), 135.2 (C), 133.9 (C), 133.5 (CH), 130.7 (CH), 129.8 (2 CH), 129.4 (2 CH), 129.3 (2 CH), 129.0 (CH), 128.9 (2 CH), 128.6 (2 CH), 128.1 (C), 127.2 (3 CH), 123.3 (CH), 122.3 (CH), 53.8 ( $\text{CH}_2$ ), 41.9 (CH), 28.2 ( $\text{CH}_2$ ); **HRMS (FAB)** calcd for:  $\text{C}_{30}\text{H}_{24}\text{N}^+$  398.1903, found: 398.1909; **IR (KBr,  $\text{cm}^{-1}$ )**: 1604, 1057 ( $\nu_{\text{B-F}}$ ), 764, 702.

**9-Chloro-1,7-diphenyl-2,3-dihydro-1*H*-pyrido[3,2,1-*ij*]quinolin-4-ium tetrafluoroborate (3ea)**

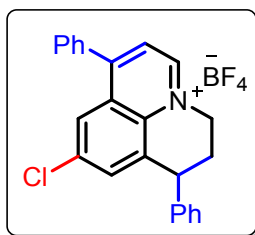

Yellow solid; m.p. 124-126 °C;  $^1\text{H NMR}$  (400 MHz,  $(\text{CD}_3)_2\text{SO}$ ):  $\delta$  9.56 (d,  $J = 6.0$  Hz, 1 H), 8.25 (d,  $J = 6.0$  Hz, 1 H), 7.99 (d,  $J = 2.0$  Hz, 1 H), 7.73 (s, 5 H), 7.66-7.65 (m, 1 H), 7.43-7.40 (m, 2 H), 7.37-7.33 (m, 1 H), 7.26-7.23 (m, 2 H), 5.09-5.03 (m, 1 H), 4.92-4.83 (m, 2 H), 2.66-2.59 (m, 2 H);  $^{13}\text{C NMR}$  (100 MHz,  $(\text{CD}_3)_2\text{SO}$ ):  $\delta$  156.8 (C), 148.2 (CH), 142.5 (C), 136.0 (C), 135.1 (C), 134.7 (C), 134.2 (C), 134.1 (CH), 130.8 (CH), 129.7 (2 CH), 129.4 (2 CH), 128.9 (2 CH), 128.7 (C), 128.6 (2 CH), 127.4 (CH), 124.9 (CH), 123.0 (CH), 54.1 ( $\text{CH}_2$ ), 41.8 (CH), 28.0 ( $\text{CH}_2$ ); **HRMS (FAB)** calcd for:  $\text{C}_{24}\text{H}_{19}\text{ClN}^+$  356.1201, found: 356.1203; **IR (KBr,  $\text{cm}^{-1}$ )**: 1604, 1450, 1057 ( $\nu_{\text{B-F}}$ ), 764, 702.

**9-Fluoro-1,7-diphenyl-2,3-dihydro-1*H*-pyrido[3,2,1-*ij*]quinolin-4-ium tetrafluoroborate (3fa)**

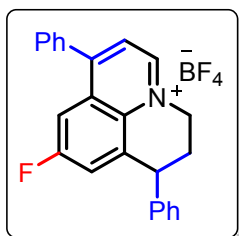

Brown solid; m.p. 76-78 °C;  $^1\text{H NMR}$  (400 MHz,  $(\text{CD}_3)_2\text{SO}$ ):  $\delta$  9.47 (d,  $J = 6.0$  Hz, 1 H), 8.24 (d,  $J = 6.0$  Hz, 1 H), 7.79-7.76 (m, 1 H), 7.73 (s, 5 H), 7.61-7.58 (m, 1 H), 7.44-7.40 (m, 2 H), 7.37-7.34 (m, 1 H), 7.26-7.24 (m, 2 H), 5.09-5.02 (m, 1 H), 4.91-4.84 (m, 2 H), 2.71-2.59 (m, 2 H);  $^{13}\text{C NMR}$  (100 MHz,  $(\text{CD}_3)_2\text{SO}$ ):  $\delta$  160.5 (d,  $J = 250.0$  Hz, C), 157.0 (d,  $J = 5.0$  Hz, C), 147.5 (CH), 142.4 (C), 137.3 (d,  $J = 8.0$  Hz, C), 134.8 (C), 133.6 (C), 130.7 (CH), 129.6 (2 CH), 129.4 (d,  $J = 12.5$  Hz, C), 129.3 (2 CH), 128.9 (2 CH), 128.6 (2 CH), 127.4 (CH), 123.8 (d,  $J = 26.0$  Hz, CH), 122.7 (CH), 110.4 (d,  $J = 24.0$  Hz, CH), 54.1 ( $\text{CH}_2$ ), 42.0 (CH), 28.0 ( $\text{CH}_2$ ); **HRMS (FAB)** calcd for:  $\text{C}_{24}\text{H}_{19}\text{FN}^+$  340.1496, found: 340.1501; **IR (KBr,  $\text{cm}^{-1}$ )**: 1619, 1450, 1049 ( $\nu_{\text{B-F}}$ ), 764, 702.

**9-Methyl-1,7,8-triphenyl-2,3-dihydro-1*H*-pyrido[3,2-*ij*]quinolin-4-ium tetrafluoroborate (3ga)**

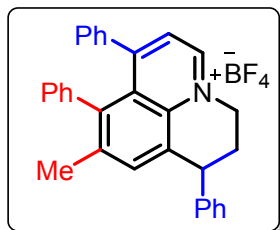

Brown solid; m.p. 156-158 °C; <sup>1</sup>H NMR (400 MHz, (CD<sub>3</sub>)<sub>2</sub>SO): δ 9.41 (d, *J* = 6.0 Hz, 1 H), 8.17 (d, *J* = 6.0 Hz, 1 H), 8.08 (s, 1 H), 7.76-7.73 (m, 5 H), 7.54 (t, *J* = 7.6 Hz, 1 H), 7.34 (t, *J* = 7.6 Hz, 1 H), 7.29 (d, *J* = 7.2 Hz, 1 H), 7.19-7.17 (m, 3 H), 7.04 (t, *J* = 7.6 Hz, 1 H), 6.74-6.72 (m, 2 H), 6.34 (d, *J* = 7.6 Hz, 1 H), 4.97(d, *J* = 14 Hz, 1 H), 4.50-4.46 (m, 2 H), 2.69-2.62 (m, 1 H), 2.32 (d, *J* = 14 Hz, 1 H), 2.10 (s, 3 H); <sup>13</sup>C NMR (100 MHz, (CD<sub>3</sub>)<sub>2</sub>SO): δ 157.5 (C), 148.9 (C), 148.0 (CH), 143.4 (C), 140.0 (C), 137.3 (C), 135.8 (C), 135.7 (C), 130.9 (CH), 130.2 (2 CH), 129.7 (2 CH), 129.4 (C), 129.2 (CH), 128.7 (2 CH), 128.6 (3 CH), 128.4 (CH), 128.3 (CH), 128.0 (CH), 127.5 (C), 127.1 (CH), 126.8 (CH), 122.3 (CH), 51.8 (CH<sub>2</sub>), 40.1 (CH), 28.4 (CH<sub>2</sub>), 21.9 (CH<sub>3</sub>); **HRMS (FAB)** calcd for: C<sub>31</sub>H<sub>26</sub>N<sup>+</sup> 412.2060, found: 412.2067; **IR (KBr, cm<sup>-1</sup>):** 1597, 1049 (ν<sub>B-F</sub>), 764, 702.

**6,8-Dimethyl-4-phenylquinoline (3ha')**

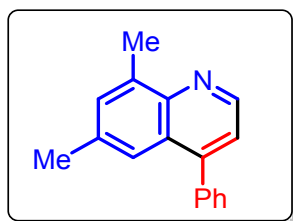

Pale yellow oil; <sup>1</sup>H NMR (400 MHz, CDCl<sub>3</sub>): δ 8.88 (d, *J* = 4.4 Hz, 1 H), 7.51-7.45 (m, 6 H), 7.41 (s, 1 H), 7.26 (d, *J* = 4.4 Hz, 1 H), 2.82 (s, 3 H), 2.40 (s, 3 H); <sup>13</sup>C NMR (100 MHz, CDCl<sub>3</sub>): δ 148.0 (C), 147.7 (CH), 146.3 (C), 138.6 (C), 136.9 (C), 136.0 (C), 131.9 (CH), 129.5 (2 CH), 128.4 (2 CH), 128.1 (CH), 126.7 (C), 122.6 (CH), 121.2 (CH), 21.7 (CH<sub>3</sub>), 18.5 (CH<sub>3</sub>); **HRMS (EI)** calcd for: C<sub>17</sub>H<sub>15</sub>N 233.1204, found: 233.1211; **IR (KBr, cm<sup>-1</sup>):** 2924, 2854, 1489, 1450, 864, 764, 702.



**9-Methyl-1,7-di-*p*-tolyl-2,3-dihydro-1*H*-pyrido[3,2,1-*ij*]quinolin-4-ium tetrafluoroborate (3ab)**

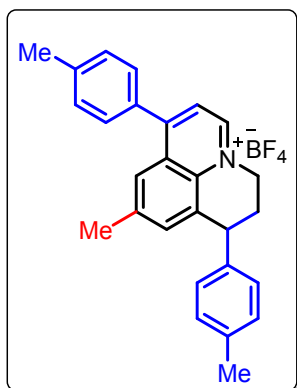

Brown solid; m.p. 99-101 °C;  $^1\text{H NMR}$  (400 MHz,  $(\text{CD}_3)_2\text{SO}$ ):  $\delta$  9.36 (d,  $J = 6.0$  Hz, 1 H), 8.07 (d,  $J = 6.0$  Hz, 1 H), 7.88 (s, 1 H), 7.60 (d,  $J = 8.0$  Hz, 2 H), 7.53-7.51 (m, 3 H), 7.20 (d,  $J = 8.0$  Hz, 2 H), 7.09 (d,  $J = 8.0$  Hz, 2 H), 5.02-4.96 (m, 1 H), 4.84-4.79 (m, 1 H), 4.73-4.70 (m, 1 H), 2.60-2.54 (m, 2 H), 2.48 (s, 3 H), 2.43 (s, 3 H), 2.31 (s, 3 H);  $^{13}\text{C NMR}$  (100 MHz,  $(\text{CD}_3)_2\text{SO}$ ):  $\delta$  156.9 (C), 146.4 (CH), 140.4 (C), 140.1 (C), 139.8 (C), 136.3 (CH), 136.3 (C), 134.8 (C), 132.9 (C), 132.5 (C), 129.8 (2 CH), 129.7 (2 CH), 129.4 (2 CH), 128.5 (2 CH), 127.7 (C), 125.2 (CH), 121.7 (CH), 53.8 ( $\text{CH}_2$ ), 41.4 (CH), 28.4 ( $\text{CH}_2$ ), 21.2 ( $\text{CH}_3$ ), 21.0 ( $\text{CH}_3$ ), 20.6 ( $\text{CH}_3$ ); **HRMS (FAB)** calcd for:  $\text{C}_{27}\text{H}_{26}\text{N}^+$  364.2080, found: 364.2066; **IR (KBr,  $\text{cm}^{-1}$ )**: 2923, 1612, 1442, 1057 ( $\nu_{\text{B-F}}$ ), 825, 733.

**1,7-Bis(4-bromophenyl)-9-methyl-2,3-dihydro-1*H*-pyrido[3,2,1-*ij*]quinolin-4-ium tetrafluoroborate (3ac)**

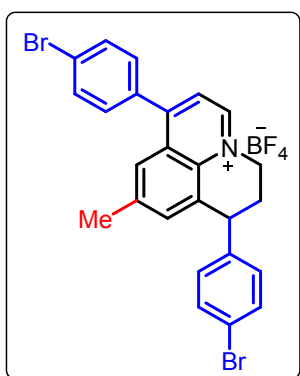

Brown solid; m.p. 64-66 °C;  $^1\text{H NMR}$  (400 MHz,  $(\text{CD}_3)_2\text{SO}$ ):  $\delta$  9.40 (d,  $J = 6.0$  Hz, 1 H), 8.14 (d,  $J = 6.0$  Hz, 1 H), 7.91 (d,  $J = 8.4$  Hz, 2 H), 7.85 (s, 1 H), 7.64 (d,  $J = 8.4$  Hz, 2 H), 7.58 (d,  $J = 8.0$  Hz, 2 H), 7.55 (s, 1 H), 7.19 (d,  $J = 8.0$  Hz, 2 H), 5.04-4.99 (m, 1 H), 4.86-4.78 (m, 2 H), 2.62-2.56 (m, 2 H), 2.45 (s, 3 H);  $^{13}\text{C NMR}$  (100 MHz,  $(\text{CD}_3)_2\text{SO}$ ):  $\delta$  155.6 (C), 146.7 (CH), 142.5 (C), 140.2 (C), 136.5 (CH), 134.7 (C), 134.4 (C), 132.2 (C), 132.2 (2 CH), 131.7 (4 CH), 130.9 (2 CH), 127.7 (C), 125.1 (CH), 124.2 (C), 121.9 (CH), 120.4 (C), 53.8 ( $\text{CH}_2$ ), 41.2 (CH), 28.1 ( $\text{CH}_2$ ), 21.1 ( $\text{CH}_3$ ); **HRMS (FAB)** calcd for:  $\text{C}_{25}\text{H}_{20}\text{Br}_2\text{N}^+$  491.9957, found: 491.9965; **IR (KBr,  $\text{cm}^{-1}$ )**: 2962, 1612, 1489, 1057 ( $\nu_{\text{B-F}}$ ), 825, 733.

**9-Methyl-1,7-dipentyl-2,3-dihydro-1*H*-pyrido[3,2,1-*ij*]quinolin-4-ium tetrafluoroborate (3ad)**

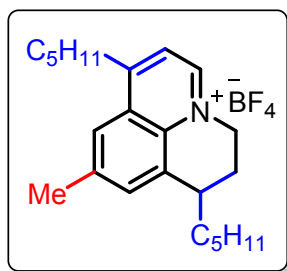

Brown oil;  $^1\text{H NMR}$  (400 MHz,  $(\text{CD}_3)_2\text{SO}$ ):  $\delta$  9.16 (d,  $J = 6.0$  Hz, 1 H), 8.21 (s, 1 H), 7.96 (d,  $J = 6.0$  Hz, 1 H), 7.93 (s, 1 H), 4.86-4.83 (m, 2 H), 3.31-3.29 (m, 2 H), 3.27-3.23 (m, 1 H), 2.62 (s, 3 H), 2.35-2.32 (m, 1 H), 2.25-2.19 (m, 1 H), 1.80-1.66 (m, 4 H), 1.43-1.33 (m, 10 H), 0.91-0.87 (m, 6 H);  $^{13}\text{C NMR}$  (100 MHz,  $(\text{CD}_3)_2\text{SO}$ ):  $\delta$  160.3 (C), 146.0 (CH), 139.4 (C), 135.2 (CH), 134.0 (C), 133.3 (C), 128.4 (C), 122.9 (CH), 121.0 (CH), 52.5 ( $\text{CH}_2$ ), 34.9 (CH), 34.3 ( $\text{CH}_2$ ), 32.2 ( $\text{CH}_2$ ), 31.2 ( $\text{CH}_2$ ), 31.0 ( $\text{CH}_2$ ), 29.3 ( $\text{CH}_2$ ), 25.7 ( $\text{CH}_2$ ), 23.9 ( $\text{CH}_2$ ), 22.0 ( $\text{CH}_2$ ), 21.9 ( $\text{CH}_2$ ), 21.2 ( $\text{CH}_3$ ), 13.9 ( $\text{CH}_3$ ), 13.8 ( $\text{CH}_3$ ); **HRMS (FAB)** calcd for:  $\text{C}_{23}\text{H}_{34}\text{N}^+$  324.2686, found: 324.2690; **IR (KBr,  $\text{cm}^{-1}$ )**: 2931, 2861, 1612, 1458, 1057 ( $\nu_{\text{B-F}}$ ), 764, 732.

**2,6,9-Trimethyl-1,7-diphenyl-2,3-dihydro-1*H*-pyrido[3,2,1-*ij*]quinolin-4-ium tetrafluoroborate (3ae)**

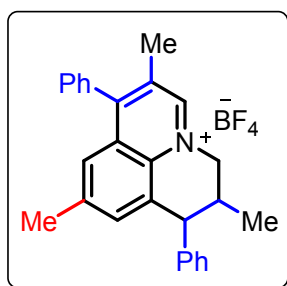

Yellow solid; m.p. 78-80 °C;  $^1\text{H NMR}$  (400 MHz,  $(\text{CD}_3)_2\text{SO}$ ):  $\delta$  9.45 (s, 1 H), 7.72-7.66 (m, 3 H), 7.45-7.41 (m, 4 H), 7.38-7.36 (m, 1 H), 7.29 (s, 1 H), 7.23-7.22 (m, 3 H), 4.97-4.93 (m, 1 H), 4.80-4.74 (m, 1 H), 4.36 (d,  $J = 9.2$  Hz, 1 H), 2.80-2.76 (m, 1 H), 2.35 (s, 3 H), 2.30 (s, 3 H), 1.01 (d,  $J = 6.8$  Hz, 3 H);  $^{13}\text{C NMR}$  (100 MHz,  $(\text{CD}_3)_2\text{SO}$ ):  $\delta$  155.5 (C), 148.0 (CH), 141.8 (C), 139.8 (C), 135.4 (CH), 134.0 (C), 132.9 (C), 132.9 (C), 130.1 (C), 129.5 (CH), 129.2 (2 CH), 129.0 (2 CH), 129.0 (2 CH), 128.8 (C), 128.4 (2 CH), 127.4 (CH), 124.5 (CH), 59.6 ( $\text{CH}_2$ ), 49.3 (CH), 32.6 (CH), 21.3 ( $\text{CH}_3$ ), 17.5 ( $\text{CH}_3$ ), 16.3 ( $\text{CH}_3$ ); **HRMS (FAB)** calcd for:  $\text{C}_{27}\text{H}_{26}\text{N}^+$  364.2080, found: 364.2068 ; **IR (KBr,  $\text{cm}^{-1}$ )**: 2970, 1620, 1450, 1057 ( $\nu_{\text{B-F}}$ ), 756, 702.

### 1-Benzyl-9-methyl-2,3-dihydro-1*H*-pyrido[3,2,1-*ij*]quinolin-4-ium (3af<sup>+</sup>)

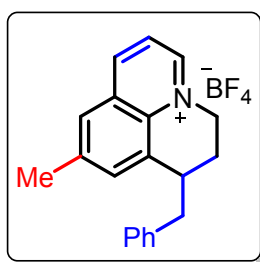

Brown solid; m.p. 163-165 °C; <sup>1</sup>H NMR (600 MHz, (CD<sub>3</sub>)<sub>2</sub>SO): δ 9.34 (d, *J* = 5.4 Hz, 1 H), 9.12 (d, *J* = 8.4 Hz, 1 H), 8.11-8.09 (m, 2 H), 7.88 (s, 1 H), 7.37-7.34 (m, 2 H), 7.32-7.31 (m, 2 H), 7.28-7.26 (m, 1 H), 5.05-5.00 (m, 1 H), 4.93-4.90 (m, 1 H), 3.58-3.55 (m, 1 H), 3.28-3.24 (m, 1 H), 2.94-2.90 (m, 1 H), 2.54 (s, 3 H), 2.26-2.21 (m, 1 H), 2.07-2.03 (m, 1 H); <sup>13</sup>C NMR (150 MHz, (CD<sub>3</sub>)<sub>2</sub>SO): δ 147.2 (CH), 145.9 (CH), 139.5 (C), 138.9 (C), 136.0 (CH), 133.7 (C), 132.4 (C), 129.8 (C), 129.4 (2 CH), 128.4 (2 CH), 126.9 (CH), 126.5 (CH), 121.5 (CH), 52.5 (CH<sub>2</sub>), 40.3 (CH<sub>2</sub>), 36.4 (CH), 23.6 (CH<sub>2</sub>), 21.0 (CH<sub>3</sub>); **HRMS (FAB)** calcd for: C<sub>20</sub>H<sub>20</sub>N<sup>+</sup> 274.1590, found: 274.1595; **IR (KBr, cm<sup>-1</sup>):** 2924, 2854, 1597, 1450, 1041 (ν<sub>B-F</sub>), 748, 702.

### 1,9-Dimethyl-1,7-diphenyl-2,3-dihydro-1*H*-pyrido[3,2,1-*ij*]quinolin-4-ium tetrafluoroborate (3ag<sup>+</sup>)

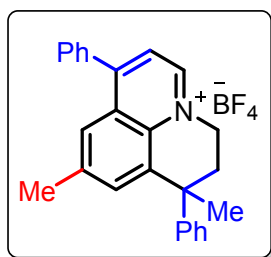

Brown solid; m.p. 146-148 °C; <sup>1</sup>H NMR (600 MHz, (CD<sub>3</sub>)<sub>2</sub>SO): δ 9.30 (d, *J* = 6.0 Hz, 1 H), 8.09 (d, *J* = 6.0 Hz, 1 H), 7.94-7.94 (m, 1 H), 7.88-7.88 (m, 1 H), 7.71-7.68 (m, 5 H), 7.33 (t, *J* = 7.2 Hz, 2 H), 7.27-7.25 (m, 1 H), 7.14-7.13 (m, 2 H), 4.99-4.95 (m, 1 H), 4.47-4.42 (m, 1 H), 2.77-2.73 (m, 1 H), 2.51 (s, 3 H), 2.48-2.45 (m, 1 H), 1.94 (s, 3 H); <sup>13</sup>C NMR (100 MHz, (CD<sub>3</sub>)<sub>2</sub>SO): δ 157.4 (C), 147.4 (C), 147.1 (CH), 140.6 (C), 137.3 (C), 136.3 (CH), 135.9 (C), 134.8 (C), 130.9 (CH), 130.1 (2 CH), 129.7 (2 CH), 129.0 (2 CH), 128.4 (C), 127.6 (2 CH), 127.2 (CH), 125.8 (CH), 122.3 (CH), 53.1 (CH<sub>2</sub>), 41.9 (C), 35.9 (CH<sub>2</sub>), 29.3 (CH<sub>3</sub>), 21.8 (CH<sub>3</sub>); **HRMS (FAB)** calcd for: C<sub>26</sub>H<sub>24</sub>N<sup>+</sup> 350.1903, found: 351.1986; **IR (KBr, cm<sup>-1</sup>):** 2924, 2854, 1604, 1527, 1442, 1049 (ν<sub>B-F</sub>), 764, 702.

**1,1',7,8'-Tetraphenyl-2,2',3,3'-tetrahydro-1*H*,1'*H*-[9,10'-bipyrido[3,2,1-*ij*]quinoline]-4,4'-diium tetrafluoroborate (4ja)**

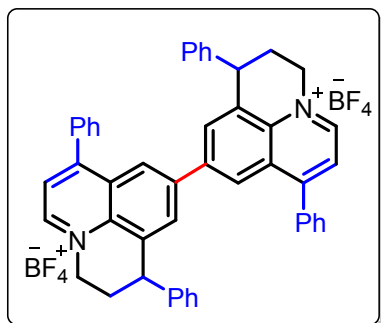

Yellow solid; m.p. 202-204 °C; <sup>1</sup>H NMR (400 MHz, (CD<sub>3</sub>)<sub>2</sub>SO): δ 9.43 (d, *J* = 6.0 Hz, 2 H), 8.18 (d, *J* = 6.0 Hz, 2 H), 8.09-8.07 (m, 2 H), 7.91 (s, 1H), 7.77-7.73 (m, 3 H), 7.65-7.61 (m, 8 H), 7.31-7.30 (m, 6 H), 7.15-7.12 (m, 4 H), 5.01-4.96 (m, 2 H), 4.85-4.76 (m, 4 H), 2.61-2.56 (m, 4 H); <sup>13</sup>C NMR (100 MHz, (CD<sub>3</sub>)<sub>2</sub>SO): δ 158.3 (C), 158.3 (C), 148.7 (2 CH), 143.1 (C), 143.0 (C), 138.4 (C), 138.3 (C), 136.7 (2 C), 135.3 (2 C), 135.2 (C), 135.0 (C), 133.3 (CH), 133.3 (CH), 131.2 (2 CH), 130.1 (4 CH), 129.8 (4 CH), 129.4 (2 CH), 129.3 (2 CH), 128.9 (2 CH), 128.9 (2 CH), 128.5 (2 C), 127.8 (CH), 127.8 (CH), 125.0 (2 CH), 123.0 (CH), 123.0 (CH), 54.7 (CH<sub>2</sub>), 54.4 (CH<sub>2</sub>), 42.5 (CH), 42.3 (CH), 28.6 (2 CH<sub>2</sub>); HRMS (FAB) calcd for: C<sub>48</sub>H<sub>38</sub>N<sub>2</sub><sup>2+</sup> 642.3024, found: 642.3028; IR (KBr, cm<sup>-1</sup>): 1604, 1442, 1373, 1304, 1242, 1049 (ν<sub>B-F</sub>), 856, 764, 702.

**1,1',7,8'-Tetrakis(4-bromophenyl)-2,2',3,3'-tetrahydro-1*H*,1'*H*-[9,10'-bipyrido[3,2,1-*ij*]quinoline]-4,4'-diium tetrafluoroborate (4jc)**

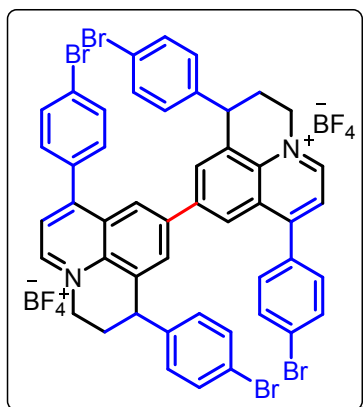

Yellow solid; m.p. 216-218 °C; <sup>1</sup>H NMR (400 MHz, (CD<sub>3</sub>)<sub>2</sub>SO): δ 9.49 (d, *J* = 4.8 Hz, 2 H), 8.24 (d, *J* = 6.0 Hz, 2 H), 8.20 (s, 1 H), 8.16 (s, 1 H), 8.07 (s, 1 H), 7.88-7.86 (m, 5 H), 7.70-7.67 (m, 4 H), 7.55-7.53 (m, 4 H), 7.17-7.13 (m, 4 H), 5.03-5.01 (m, 2 H), 4.90-4.80 (m, 4 H), 2.65-2.58 (m, 4 H); <sup>13</sup>C NMR (100 MHz, (CD<sub>3</sub>)<sub>2</sub>SO): δ 156.6 (C), 156.5 (C), 148.4 (2 CH), 142.3 (C), 142.1 (C), 138.1 (C), 137.9 (C), 136.2 (C), 136.1 (C), 134.1 (C), 134.0 (C), 133.9 (C), 133.5 (C), 133.3 (CH), 133.1 (CH), 132.2 (4 CH), 131.9 (4 CH), 131.6 (2 CH), 131.6 (2 CH), 130.8 (2 CH), 130.8 (2 CH), 127.8 (C), 127.8 (C), 124.9 (2 CH), 124.7 (C), 124.7 (C), 122.6 (CH),

122.5 (CH), 120.5 (C), 120.4 (C), 54.0 (CH<sub>2</sub>), 53.5 (CH<sub>2</sub>), 41.3 (CH), 41.1 (CH), 28.0 (CH<sub>2</sub>), 28.0 (CH<sub>2</sub>); **HRMS (FAB)** calcd for: C<sub>48</sub>H<sub>34</sub>Br<sub>4</sub>N<sub>2</sub><sup>2+</sup> 953.9445, found: 953.9449; **IR (KBr, cm<sup>-1</sup>):** 2931, 2867, 1589, 1458, 1065 (ν<sub>B-F</sub>), 825, 733.

**1,1',7,8'-tetrapentyl-2,2',3,3'-tetrahydro-1H,1'H-[9,10'-bipyrido[3,2,1-ij]quinoline]-4,4'-dium tetrafluoroborate (4jd)**

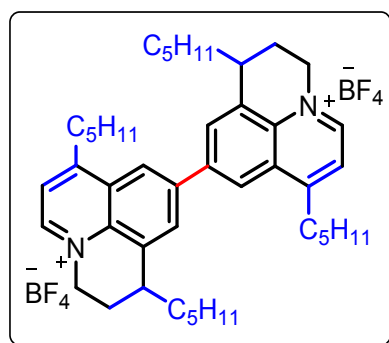

Brown oil; **<sup>1</sup>H NMR** (400 MHz, (CD<sub>3</sub>)<sub>2</sub>SO): δ 9.31 (d, *J* = 6.0 Hz, 2 H), 8.74 (s, 2 H), 8.59 (s, 2 H), 8.11 (d, *J* = 6.0 Hz, 2 H), 4.95 (s, 4 H), 3.55-3.51 (m, 4 H), 3.28-3.22 (m, 2 H), 2.45-2.32 (m, 4 H), 1.90-1.77 (m, 8 H), 1.47-1.35 (m, 20 H), 0.91-0.87 (m, 12 H); **<sup>13</sup>C NMR** (100 MHz, (CD<sub>3</sub>)<sub>2</sub>SO): δ 161.9 (2 C), 147.6 (2

CH), 138.2 (C), 138.1 (C), 135.7 (C), 135.6 (C), 134.8 (C), 134.8 (C), 132.6 (CH), 132.6 (CH), 128.7 (C), 128.7 (C), 122.8 (2 CH), 121.9 (2 CH), 52.5 (2 CH<sub>2</sub>), 35.3 (2 CH), 34.4 (CH<sub>2</sub>), 34.3 (CH<sub>2</sub>), 32.3 (2 CH<sub>2</sub>), 31.3 (2 CH<sub>2</sub>), 31.1 (CH<sub>2</sub>), 31.0 (CH<sub>2</sub>), 29.6 (2 CH<sub>2</sub>), 25.9 (CH<sub>2</sub>), 25.8 (CH<sub>2</sub>), 23.8 (CH<sub>2</sub>), 23.8 (CH<sub>2</sub>), 22.1 (CH<sub>2</sub>), 22.1 (CH<sub>2</sub>), 21.9 (2 CH<sub>2</sub>), 14.0 (2 CH<sub>3</sub>), 13.9 (2 CH<sub>3</sub>); **HRMS (FAB)** calcd for: C<sub>44</sub>H<sub>62</sub>N<sub>2</sub><sup>2+</sup> 618.4902, found: 618.4920; **IR (KBr, cm<sup>-1</sup>):** 3070, 2931, 2862, 1581, 1458, 1041 (ν<sub>B-F</sub>), 733.

**8,8'-Dimethyl-4,4'-diphenyl-6,6'-biquinoline (5ka)**

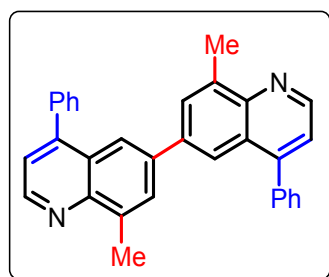

Yellow solid; m.p. 182-184 °C; **<sup>1</sup>H NMR** (400 MHz, CDCl<sub>3</sub>): δ 8.94 (d, *J* = 4.4 Hz, 2 H), 7.95-7.95 (m, 2 H), 7.84-7.83 (m, 2 H), 7.50-7.47 (m, 10 H), 7.33 (d, *J* = 4.4 Hz, 2 H), 2.90 (s, 6 H); **<sup>13</sup>C NMR** (100 MHz, CDCl<sub>3</sub>): δ 148.8 (2 CH), 147.3 (2 C), 138.4 (4 C), 138.0 (4 C), 129.6

(4 CH), 129.2 (2 CH), 128.6 (4 CH), 128.3 (2 CH), 126.9 (2 C), 122.3 (2 CH), 121.7 (2 CH), 18.8 (2 CH<sub>3</sub>); **HRMS (EI)** calcd for: C<sub>32</sub>H<sub>24</sub>N<sub>2</sub> 436.1939, found: 436.1924; **IR**

(KBr,  $\text{cm}^{-1}$ ): 2924, 2854, 1489, 1458, 872, 764, 702.

#### 8,8'-Dibromo-4,4'-diphenyl-6,6'-biquinoline (5la)

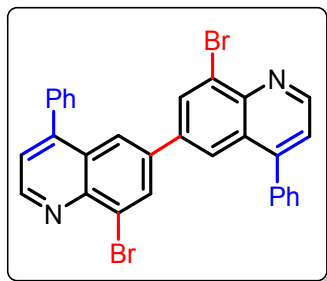

Yellow solid; m.p. 262-264 °C;  $^1\text{H NMR}$  (400 MHz,  $\text{CDCl}_3$ ):  $\delta$  9.05 (d,  $J = 4.4$  Hz, 2 H), 8.29 (d,  $J = 2.0$  Hz, 2 H), 8.04 (d,  $J = 2.0$  Hz, 2 H), 7.54-7.48 (m, 6 H), 7.47-7.44 (m, 4 H), 7.41 (d,  $J = 4.4$  Hz, 2 H);  $^{13}\text{C NMR}$  (100 MHz,  $\text{CDCl}_3$ ):  $\delta$  151.0 (2 CH), 149.4 (2 C), 145.2 (2 C), 137.8 (2 C), 137.3 (2 C), 132.2 (2 CH), 129.5 (4 CH), 128.8 (6 CH), 128.1 (2 C), 126.2 (2 C), 124.3 (2 CH), 122.8 (2 CH); **HRMS (EI)** calcd for:  $\text{C}_{30}\text{H}_{18}\text{N}_2\text{Br}_2$  563.9831, found: 563.9831; **IR** (KBr,  $\text{cm}^{-1}$ ): 2924, 2854, 1489, 1450, 864, 764, 702.

#### 4,4'-Bis(4-bromophenyl)-8,8'-dimethyl-6,6'-biquinoline (5kc)

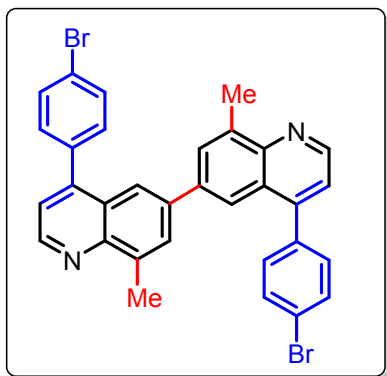

Yellow solid; m.p. 223-225°C;  $^1\text{H NMR}$  (400 MHz,  $\text{CDCl}_3$ ):  $\delta$  8.94 (d,  $J = 4.4$  Hz, 2 H), 7.85 (s, 2 H), 7.82 (s, 2 H), 7.65 (d,  $J = 8.0$  Hz, 4 H), 7.35 (d,  $J = 8.4$  Hz, 4 H), 7.31 (d,  $J = 4.0$  Hz, 2 H), 2.91 (s, 6 H);  $^{13}\text{C NMR}$  (100 MHz,  $\text{CDCl}_3$ ):  $\delta$  148.8 (2 CH), 147.6 (C), 147.3 (C), 138.4 (2 C), 138.3 (2 C), 137.2 (2 C), 131.8 (4 CH), 131.2 (4 CH), 129.2 (2 CH), 126.6 (2 C), 122.8 (2 C), 121.9 (2 CH), 121.5 (2 CH), 18.8 (2  $\text{CH}_3$ ); **HRMS (EI)** calcd for:  $\text{C}_{32}\text{H}_{22}\text{Br}_2\text{N}_2$  592.0150, found: 592.0162; **IR** (KBr,  $\text{cm}^{-1}$ ): 2916, 2854, 1589, 1481, 864, 818, 725.

### 8,8'-Dimethyl-4,4'-dipentyl-6,6'-biquinoline (5kd)

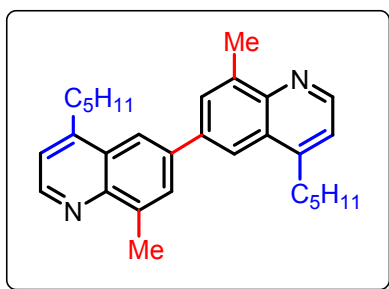

Brown oil;  $^1\text{H NMR}$  (400 MHz,  $\text{CDCl}_3$ ):  $\delta$  8.83 (d,  $J$  = 4.4 Hz, 2 H), 8.14-8.13 (m, 2 H), 7.90-7.89 (m, 2 H), 7.27 (d,  $J$  = 4.4 Hz, 2 H), 3.13 (t,  $J$  = 7.6 Hz, 4 H), 2.91 (s, 6 H), 1.86-1.78 (m, 4 H), 1.46-1.36 (m, 8 H), 0.93-0.89 (m, 6 H);  $^{13}\text{C NMR}$  (100 MHz,  $\text{CDCl}_3$ ):

$\delta$  149.1 (2 C), 149.0 (2 CH), 146.9 (2 C), 138.4 (2 C), 138.3 (2 C), 129.2 (2 CH), 127.7 (2 C), 121.1 (2 CH), 120.1 (2 CH), 34.4 (2  $\text{CH}_2$ ), 31.8 (2  $\text{CH}_2$ ), 29.9 (2  $\text{CH}_2$ ), 22.5 (2  $\text{CH}_2$ ), 18.9 (2  $\text{CH}_3$ ), 14.0 (2  $\text{CH}_3$ ); **HRMS (EI)** calcd for:  $\text{C}_{30}\text{H}_{36}\text{N}_2$  424.2878, found: 424.2869; **IR** (KBr,  $\text{cm}^{-1}$ ): 3024, 2924, 2852, 1589, 1504, 1458, 864, 732.

### 3,8,8'-Trimethyl-4-phenyl-4'-(*o*-tolyl)-6,6'-biquinoline (5ke)

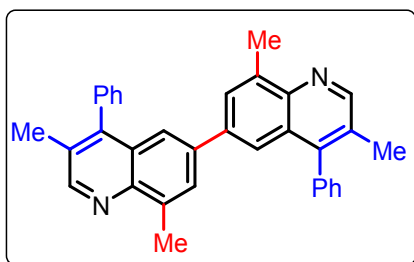

Yellow solid; m.p. 185-187 °C;  $^1\text{H NMR}$  (400 MHz,  $\text{CDCl}_3$ ): 8.82 (s, 2 H),  $\delta$  7.68 (s, 2 H), 7.48-7.46 (m, 6 H), 7.35 (d,  $J$  = 1.6 Hz, 2 H), 7.19-7.17 (m, 4 H), 2.85 (s, 6 H), 2.23 (s, 6 H);  $^{13}\text{C NMR}$  (100

MHz,  $\text{CDCl}_3$ ):  $\delta$  151.4 (2 CH), 146.7 (2 C), 145.4 (2 C), 138.4 (2 C), 137.3 (2 C), 137.0 (2 C), 129.2 (4 CH), 128.6 (4 CH), 128.2 (2 CH), 128.2 (2 C), 127.7 (2 CH), 127.6 (2 C), 122.3 (2 CH), 18.5 (2  $\text{CH}_3$ ), 17.6 (2  $\text{CH}_3$ ); **HRMS (EI)** calcd for:  $\text{C}_{34}\text{H}_{28}\text{N}_2$  464.2252, found: 464.2229; **IR** (KBr,  $\text{cm}^{-1}$ ): 2924, 2854, 1489, 1442, 864, 702.

### 3,8,8'-Trimethyl-4-phenyl-4'-(*o*-tolyl)-6,6'-biquinoline (5kf')

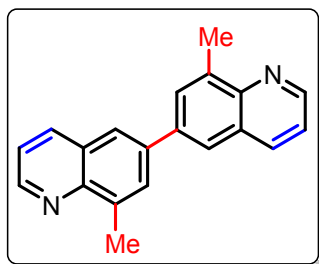

Brown solid; m.p. 186-188 °C;  $^1\text{H NMR}$  (400 MHz,  $\text{CDCl}_3$ ):  $\delta$  8.96 (dd,  $J$  = 4.4, 2.0 Hz, 2 H), 8.22 (dd,  $J$  = 8.4, 2.0 Hz, 2 H), 7.96-7.95 (m, 4 H), 7.44 (dd,  $J$  = 8.4, 4.4 Hz, 2 H), 2.91 (s, 6 H);  $^{13}\text{C NMR}$  (100 MHz,  $\text{CDCl}_3$ ):  $\delta$  149.4

(2 CH), 146.9 (2 C), 138.2 (2 C), 137.7 (2 C), 136.7 (2 CH), 129.4 (2 CH), 128.5 (2 C),

124.0 (2 CH), 121.4 (2 CH), 18.4 (2 CH<sub>3</sub>); **HRMS (EI)** calcd for: C<sub>20</sub>H<sub>16</sub>N<sub>2</sub> 284.1308, found: 284.1308 ; **IR (KBr, cm<sup>-1</sup>):** 2924, 2854, 1496, 1373, 864, 779, 702.



# 1H and 13C NMR Spectra

<sup>1</sup>H, <sup>13</sup>C, <sup>11</sup>B and <sup>19</sup>F NMR spectra of compound **3aa**

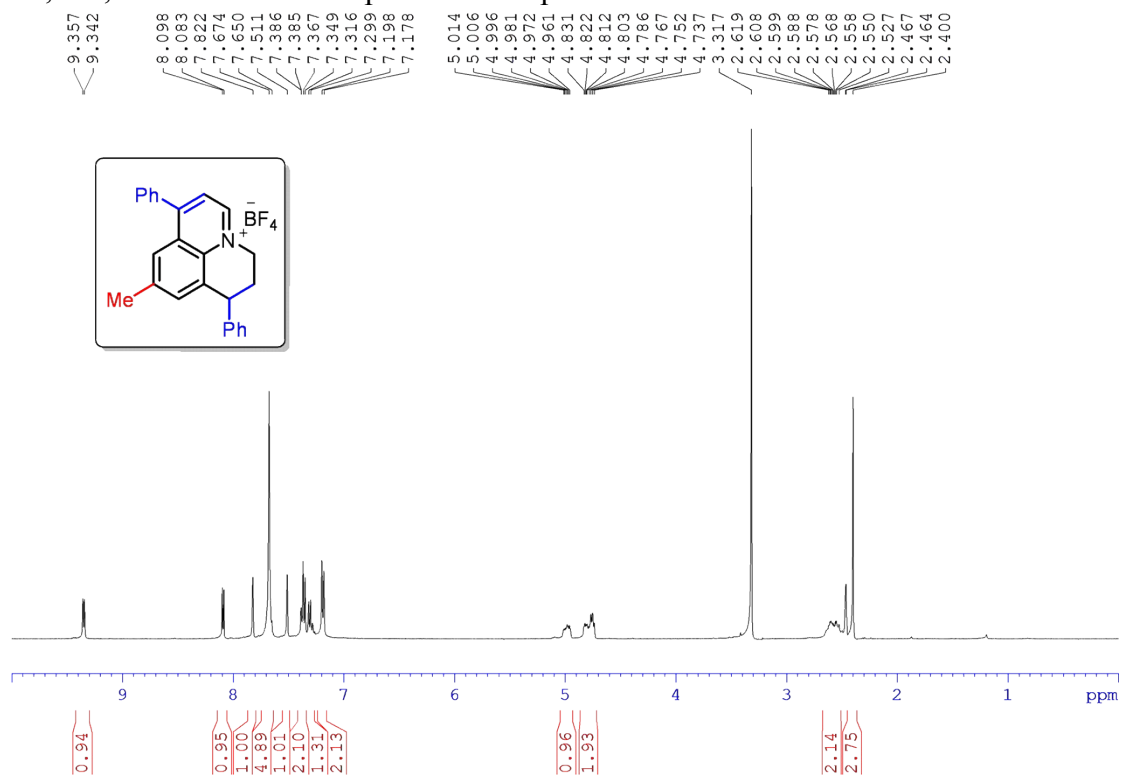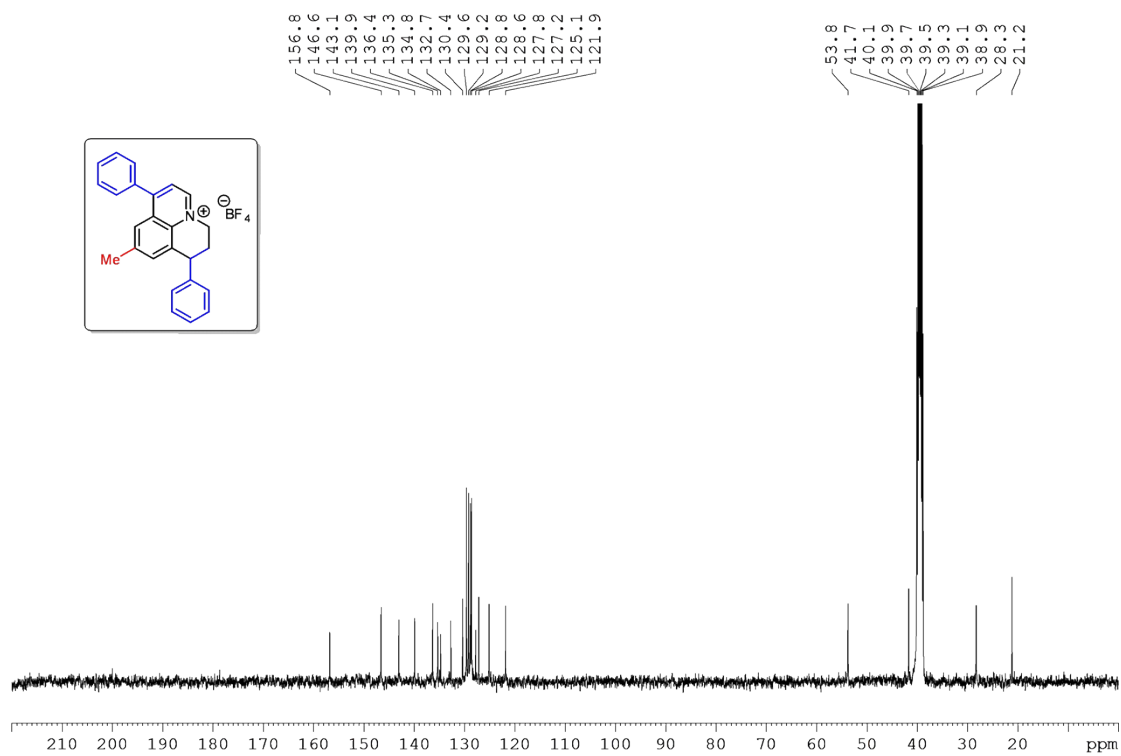

667-i1-B

Current Data Parameters  
NAME 667-i1  
EXPNO 4  
PROCNO 1  
F2 - Processing parameters  
SI 32768  
SF 160.3675635 MHz  
WDW EM  
SSB 0  
LB 0.30 Hz  
GB 0  
PC 1.00

-1.231

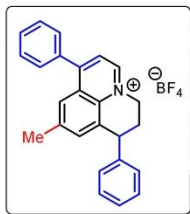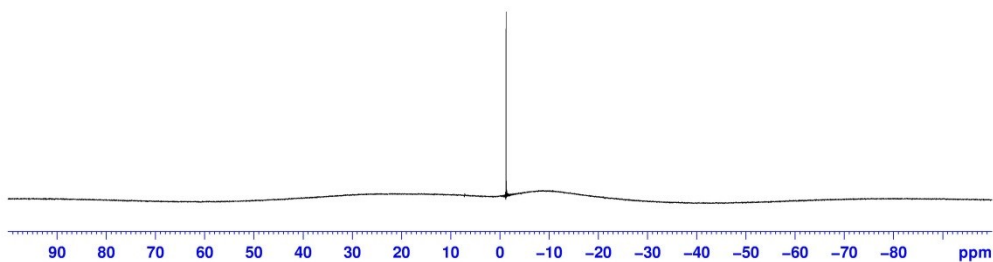

667-i2

Current Data Parameters  
NAME 667-i1  
EXPNO 5  
PROCNO 1  
F2 - Processing parameters  
SI 131072  
SF 470.3169802 MHz  
WDW EM  
SSB 0  
LB 0.30 Hz  
GB 0  
PC 1.00

140.0516

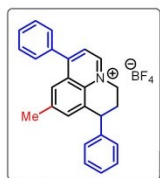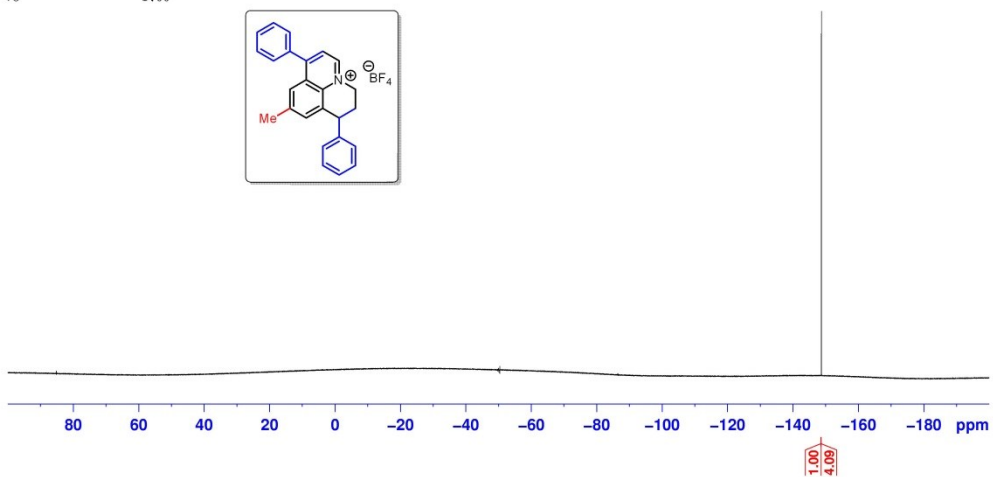

$^1\text{H}$  and  $^{13}\text{C}$  NMR spectra of compound **3ba**

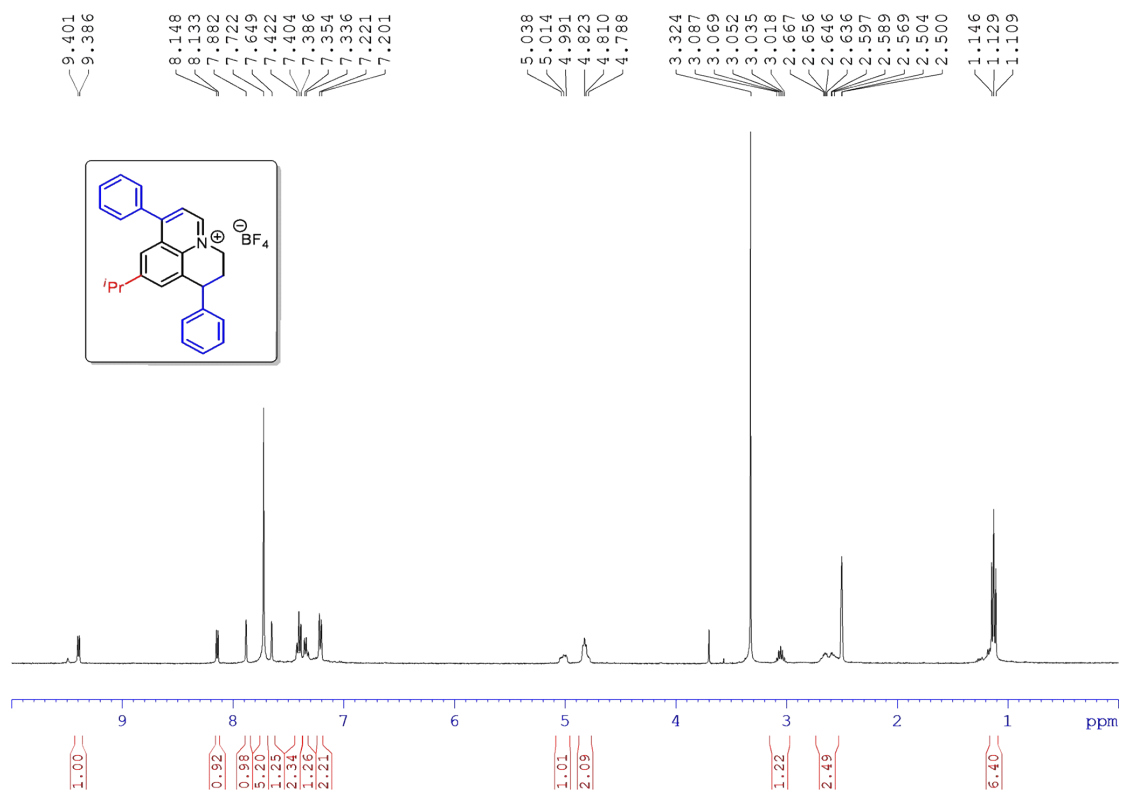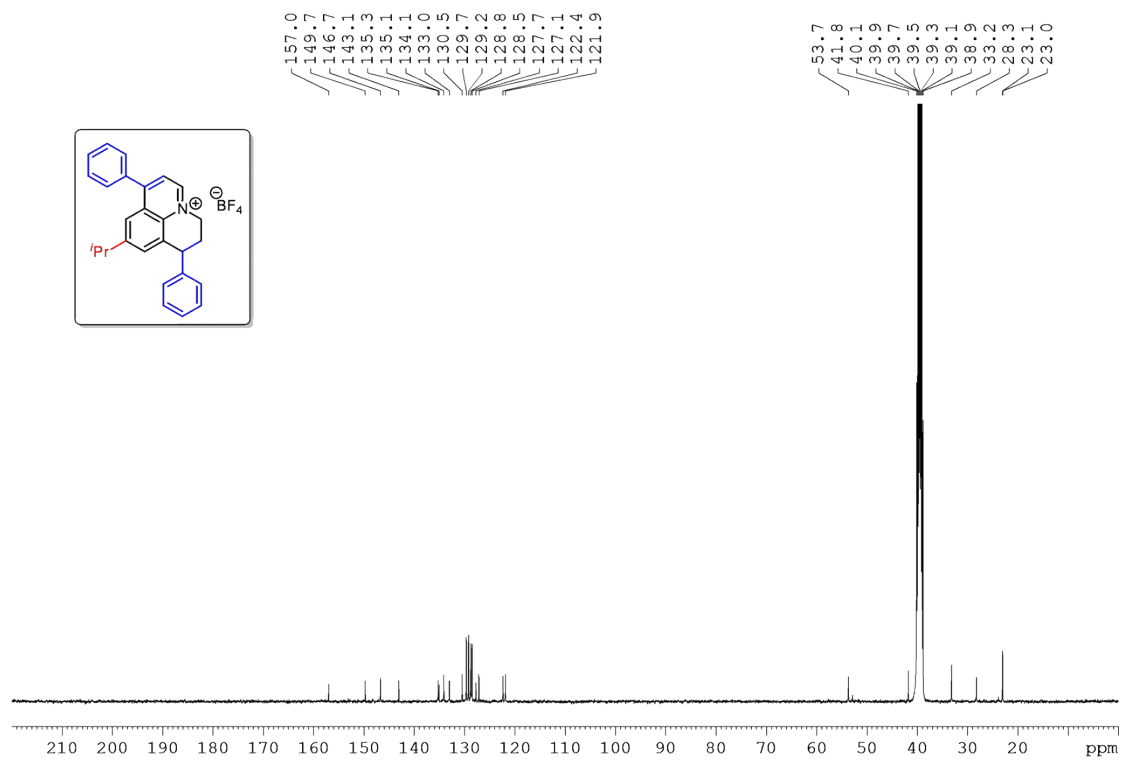

# $^1\text{H}$ and $^{13}\text{C}$ NMR spectra of compound **3ca**

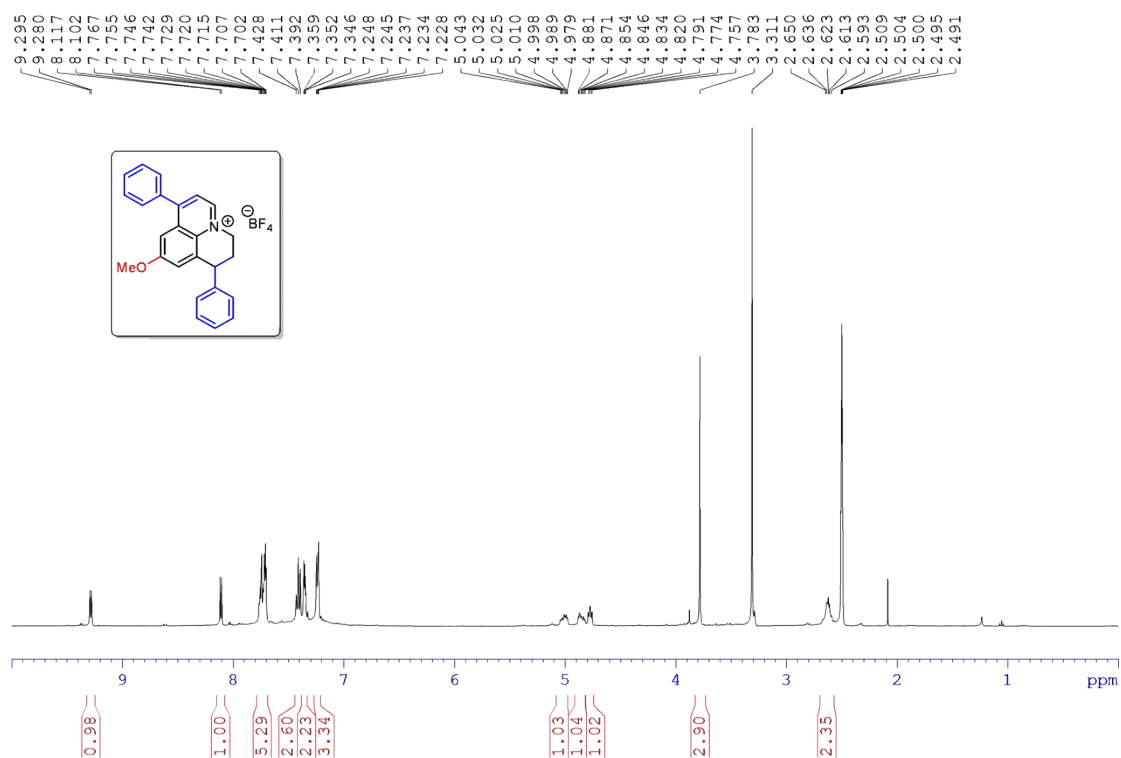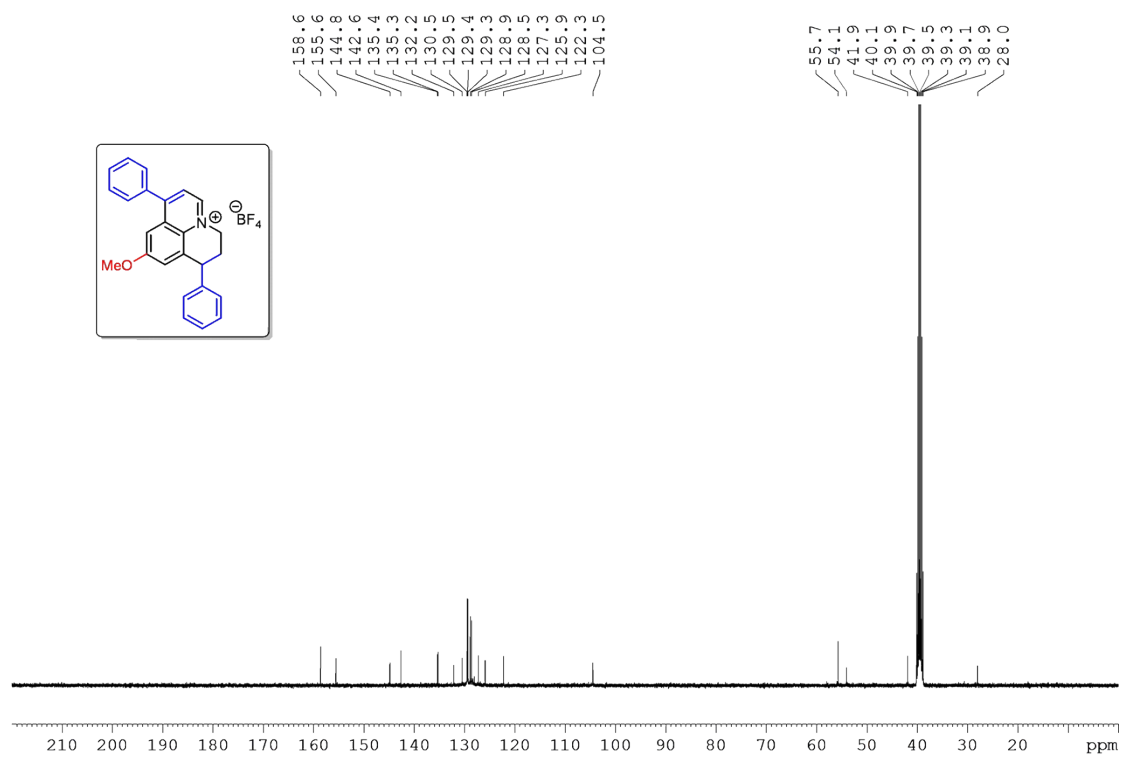

<sup>1</sup>H and <sup>13</sup>C NMR spectra of compound **3da**

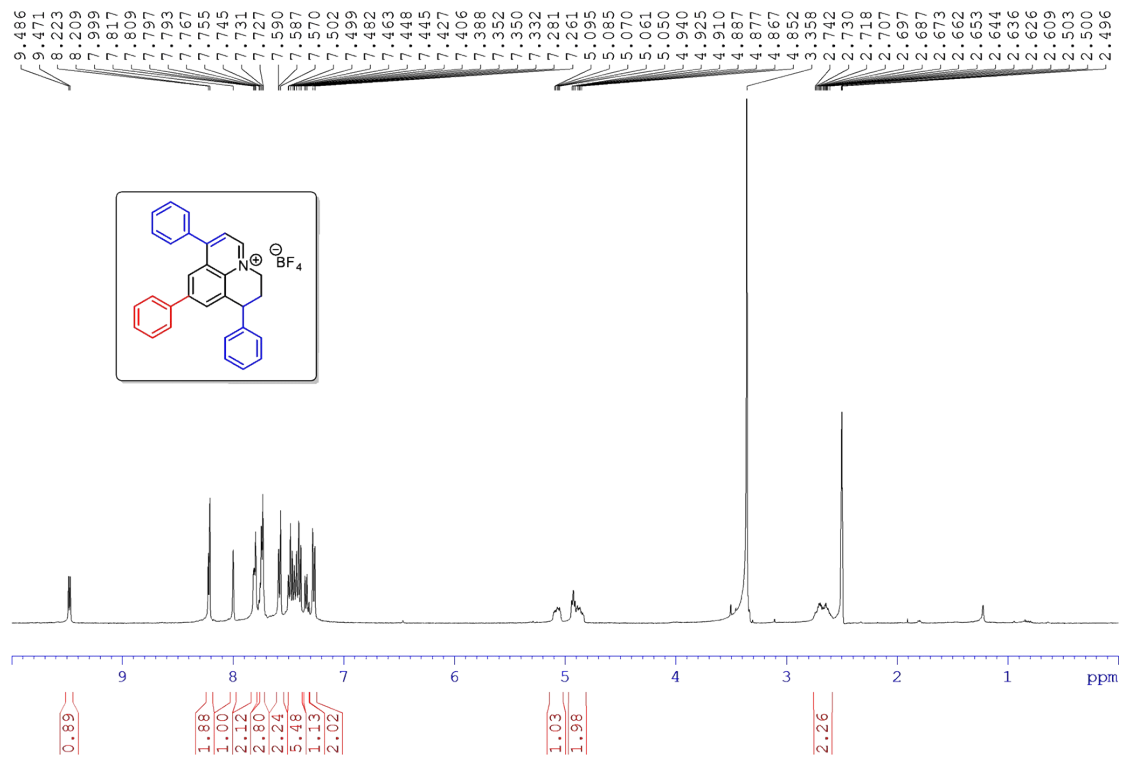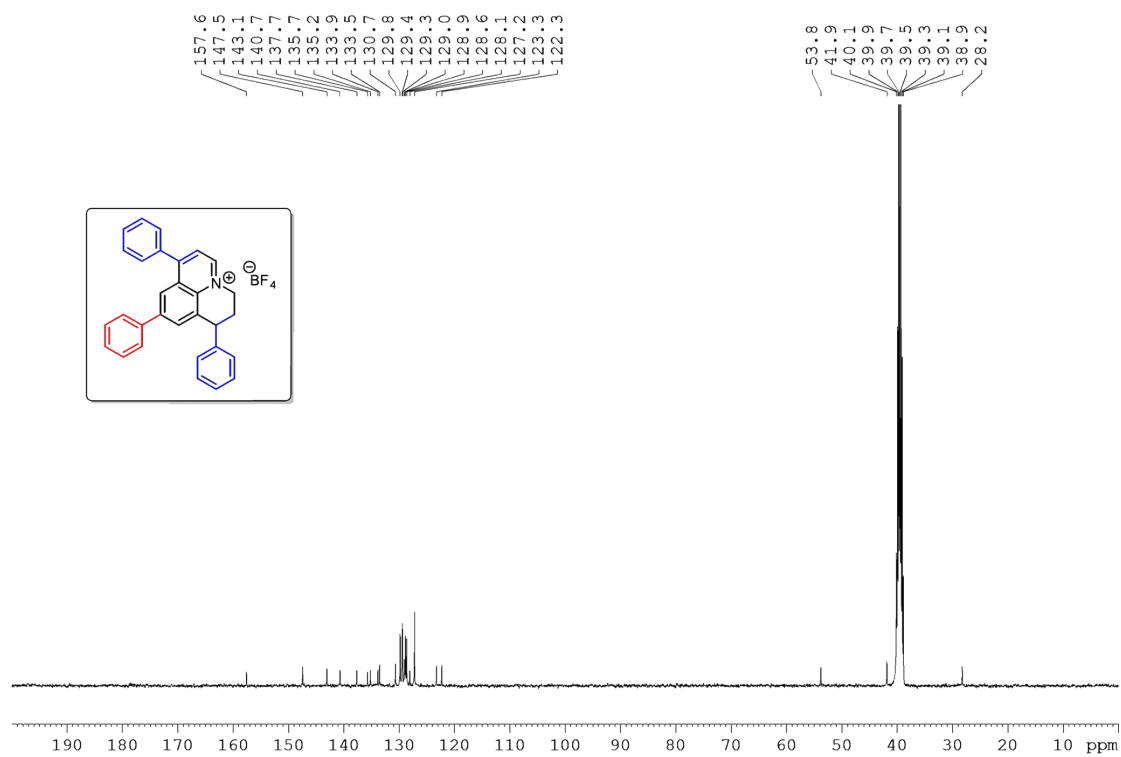

$^1\text{H}$  and  $^{13}\text{C}$  NMR spectra of compound **3ea**

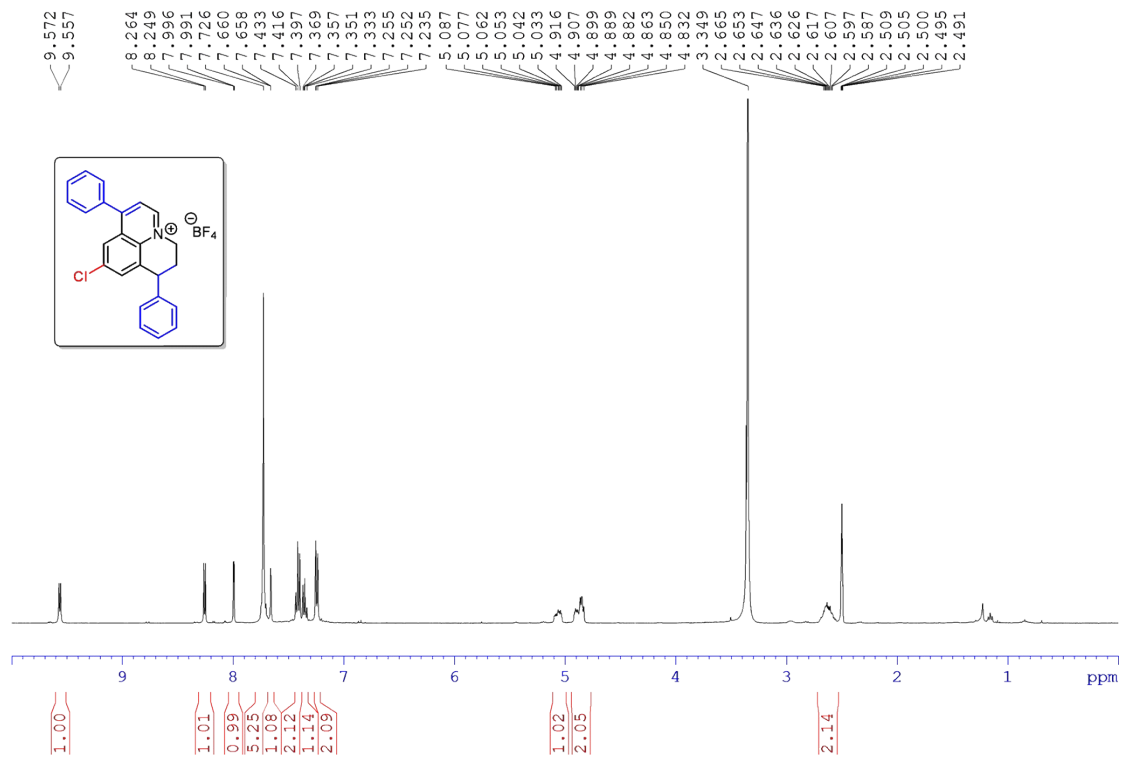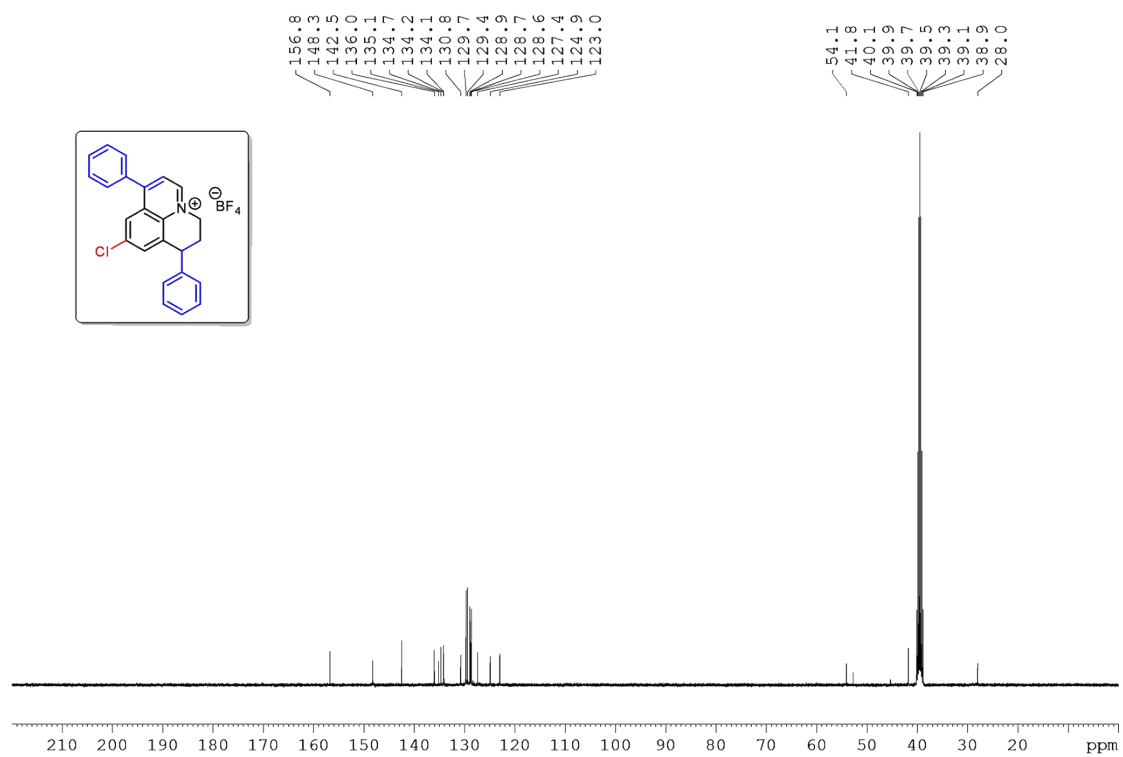

$^1\text{H}$  and  $^{13}\text{C}$  NMR spectra of compound **3fa**

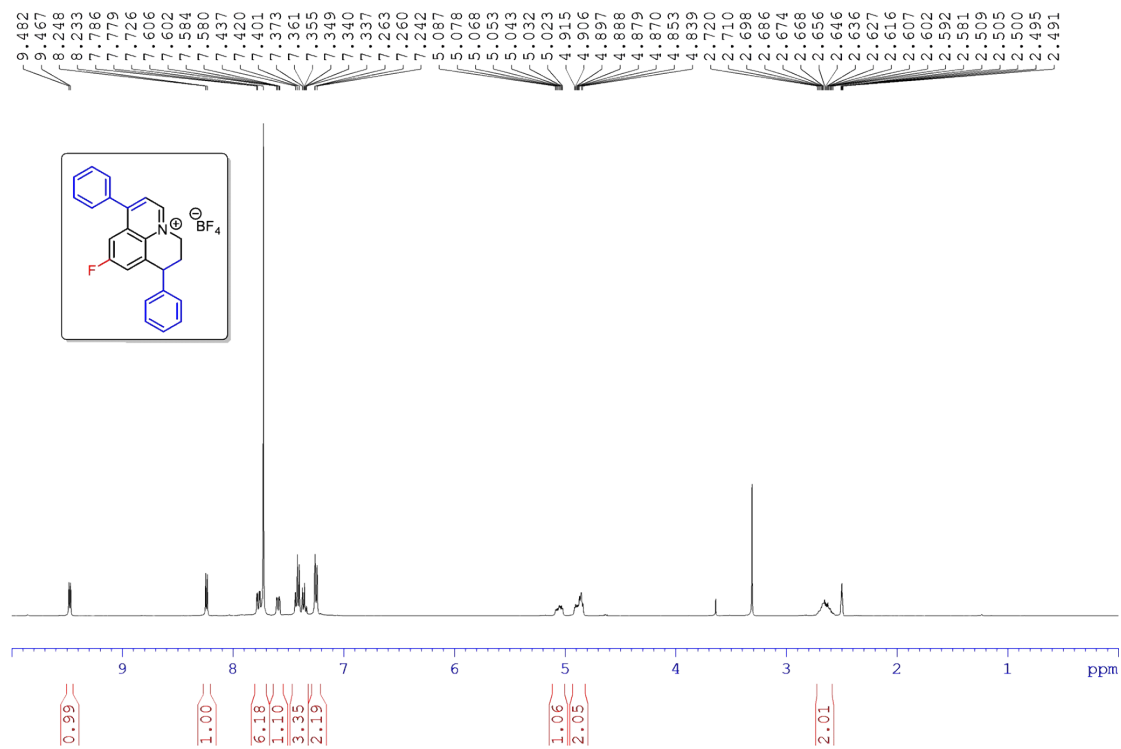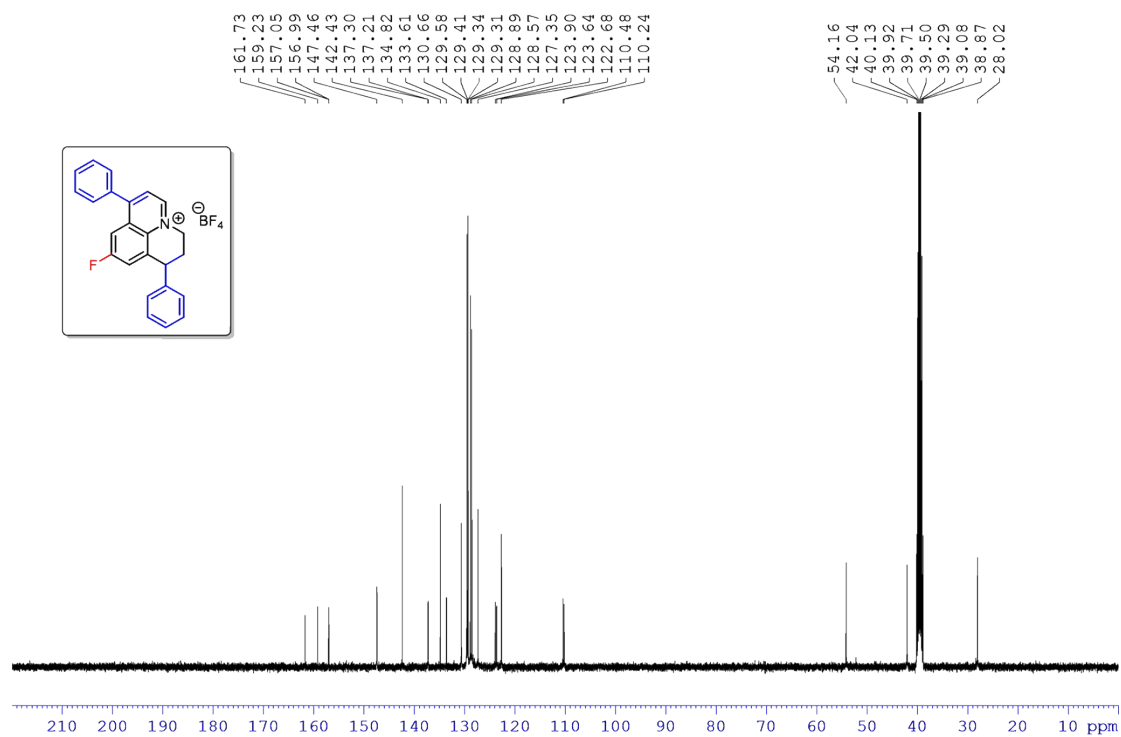

$^1\text{H}$  and  $^{13}\text{C}$  NMR spectra of compound **3ga**

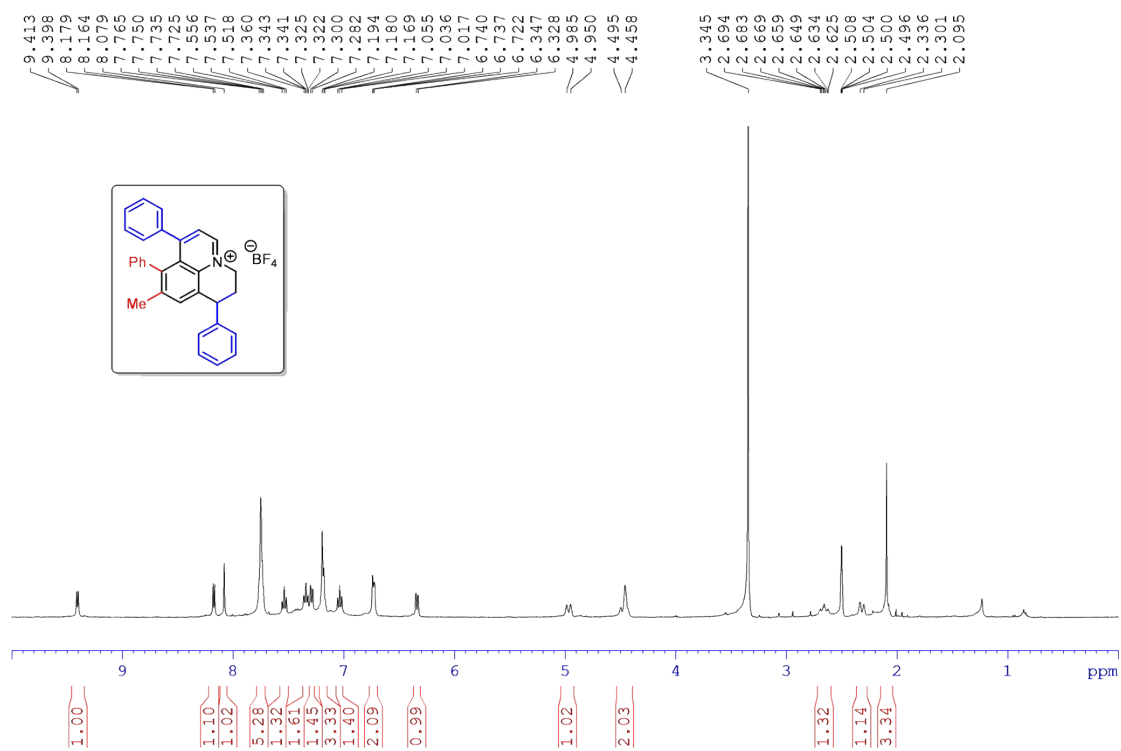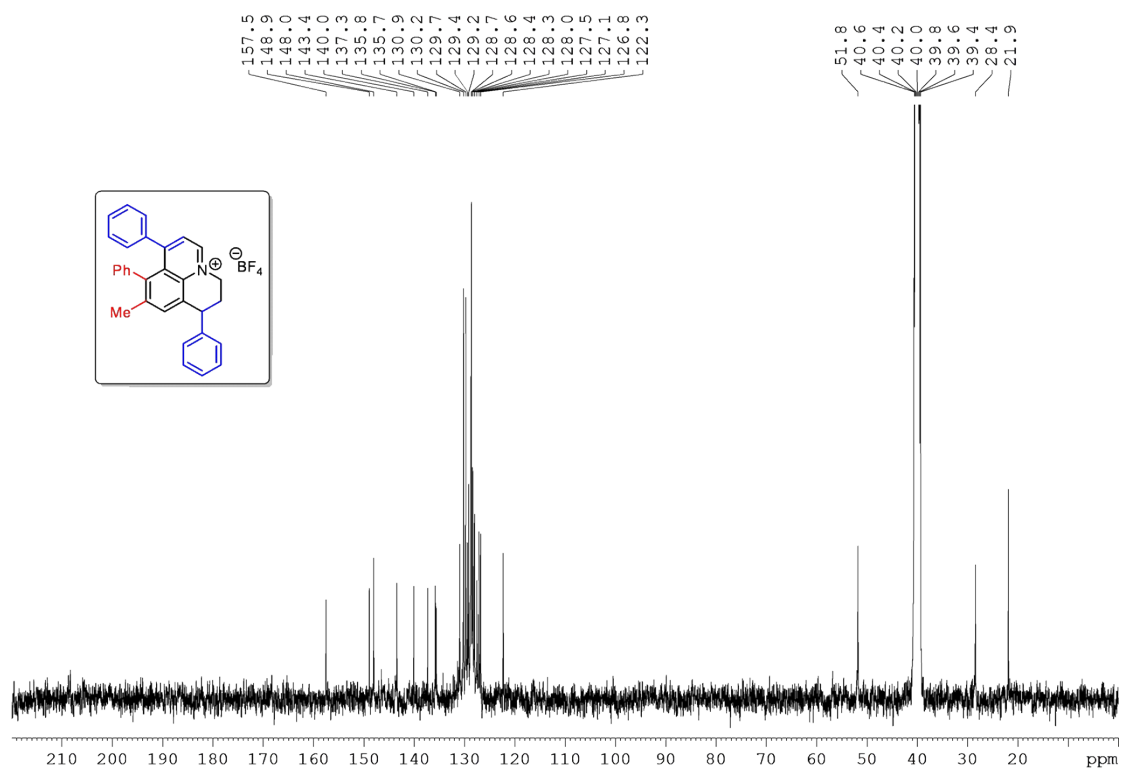



$^1\text{H}$  and  $^{13}\text{C}$  NMR spectra of compound **3ha'**

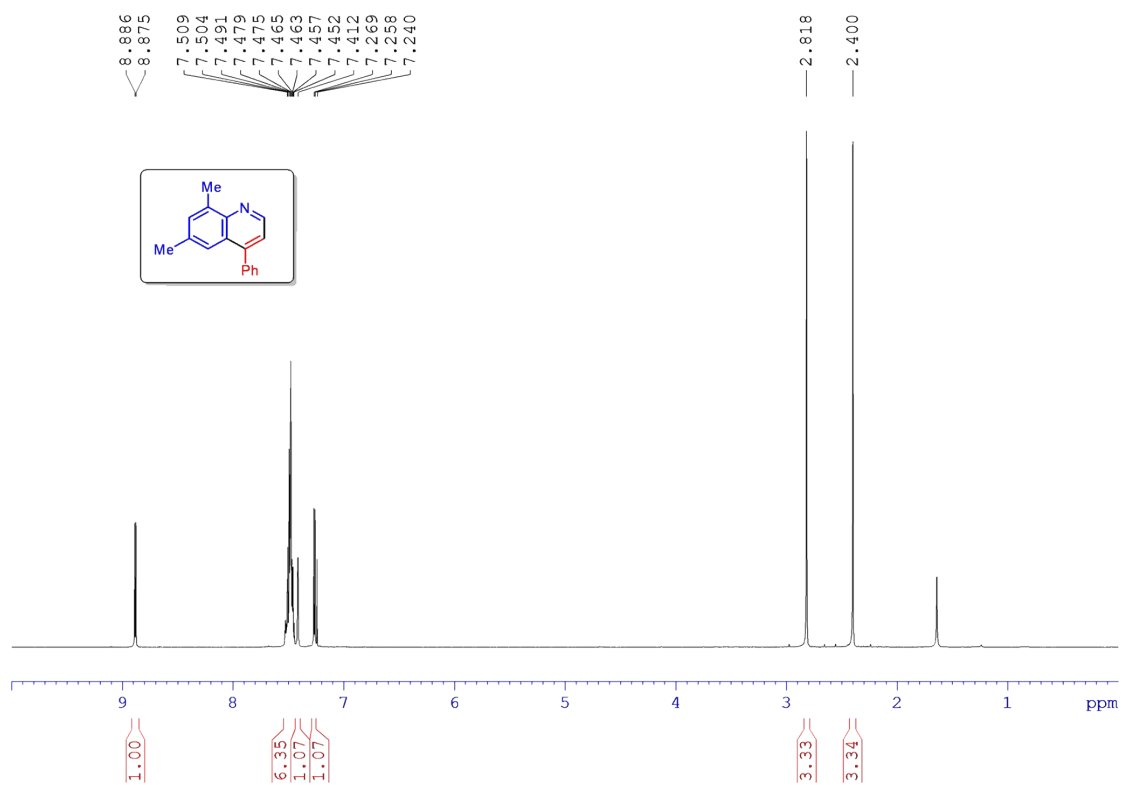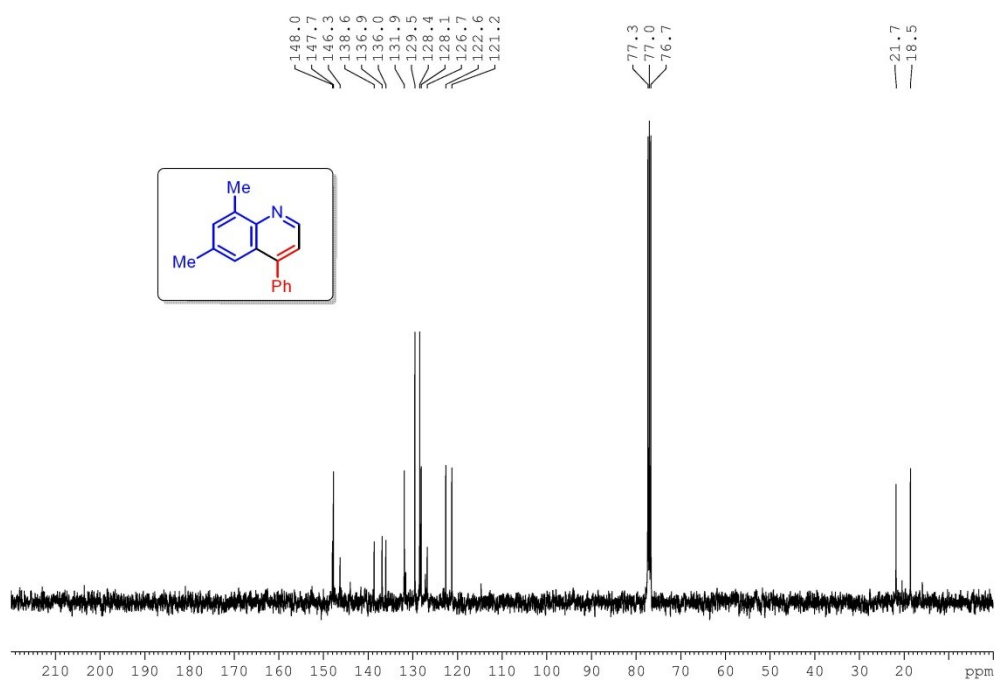

<sup>1</sup>H and <sup>13</sup>C NMR spectra of compound **3ab**

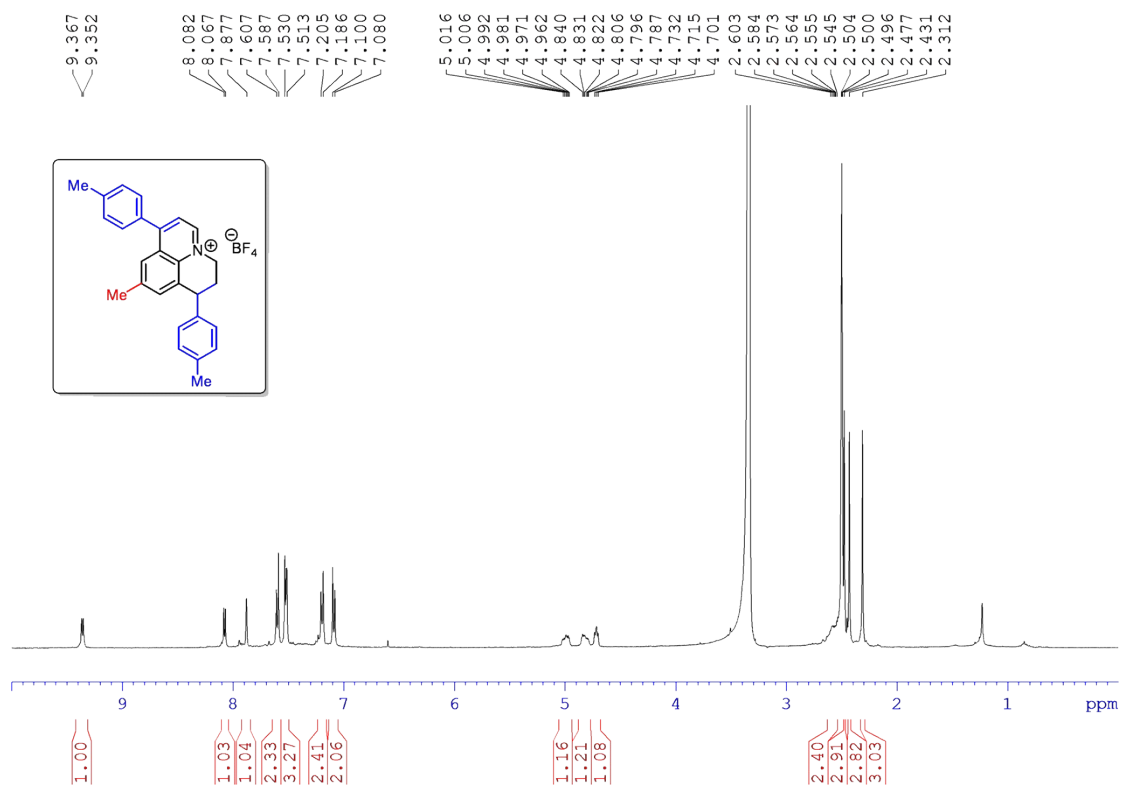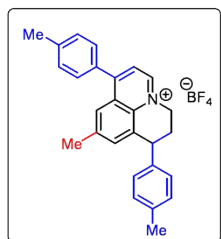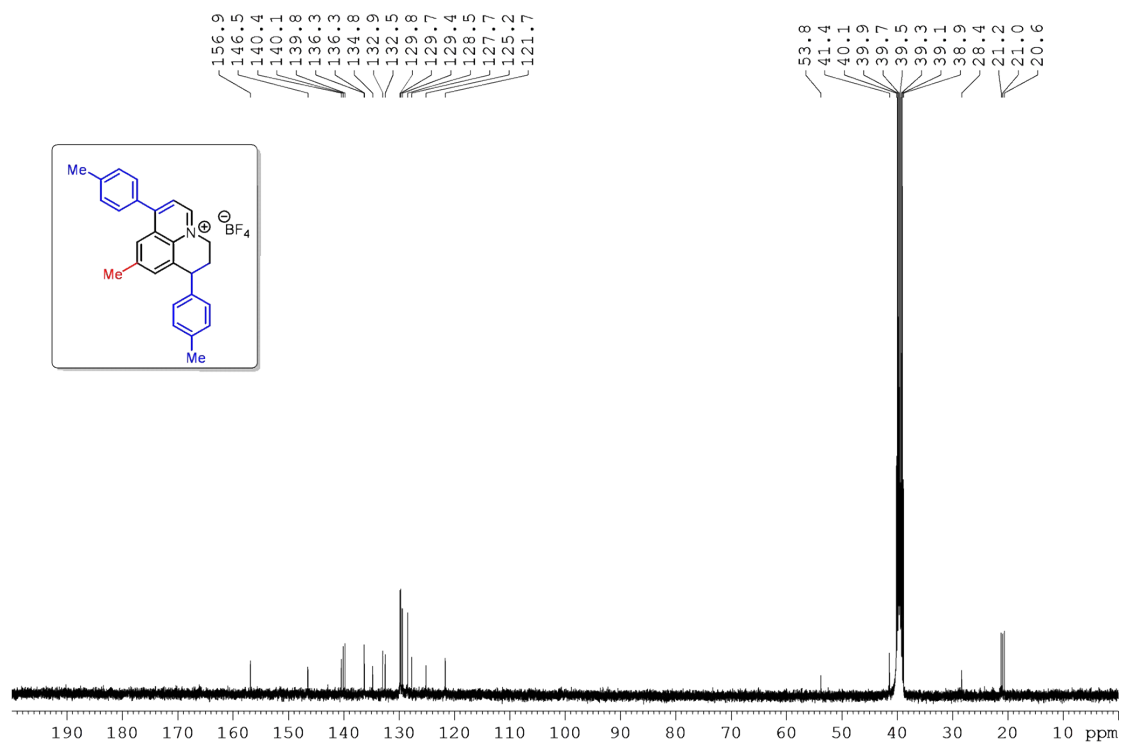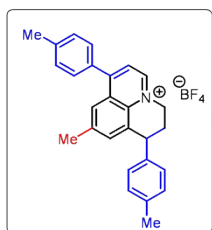

$^1\text{H}$  and  $^{13}\text{C}$  NMR spectra of compound **3ac**

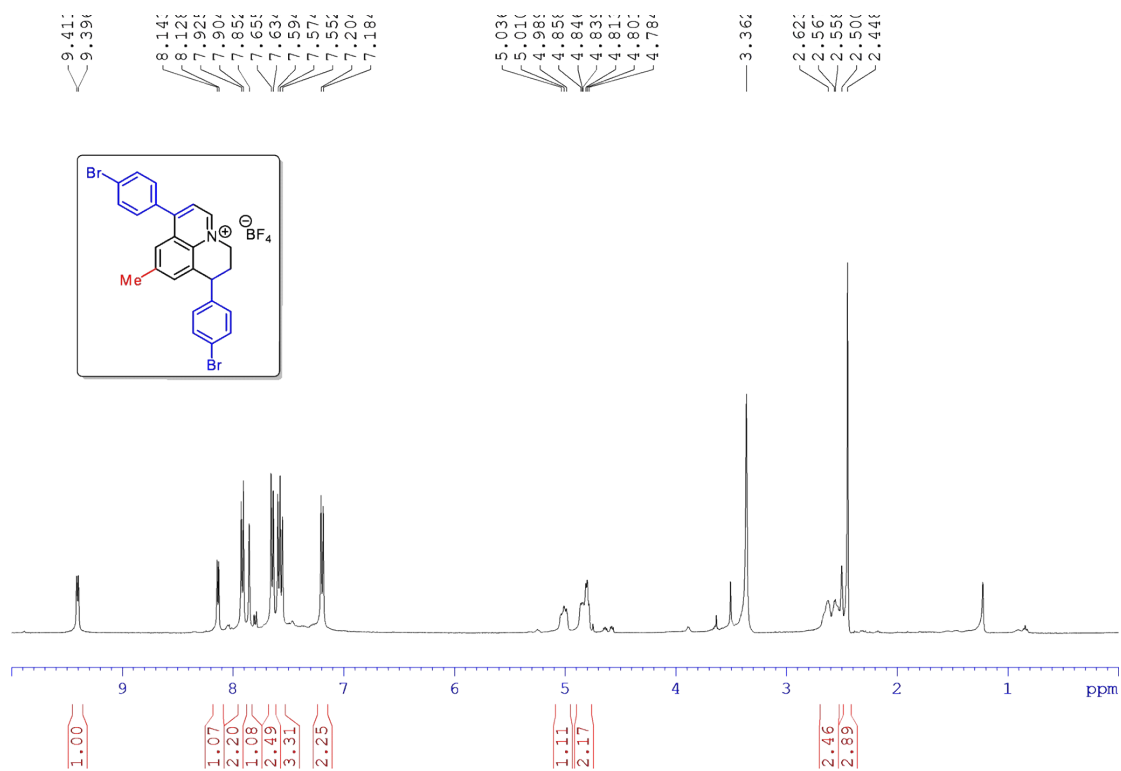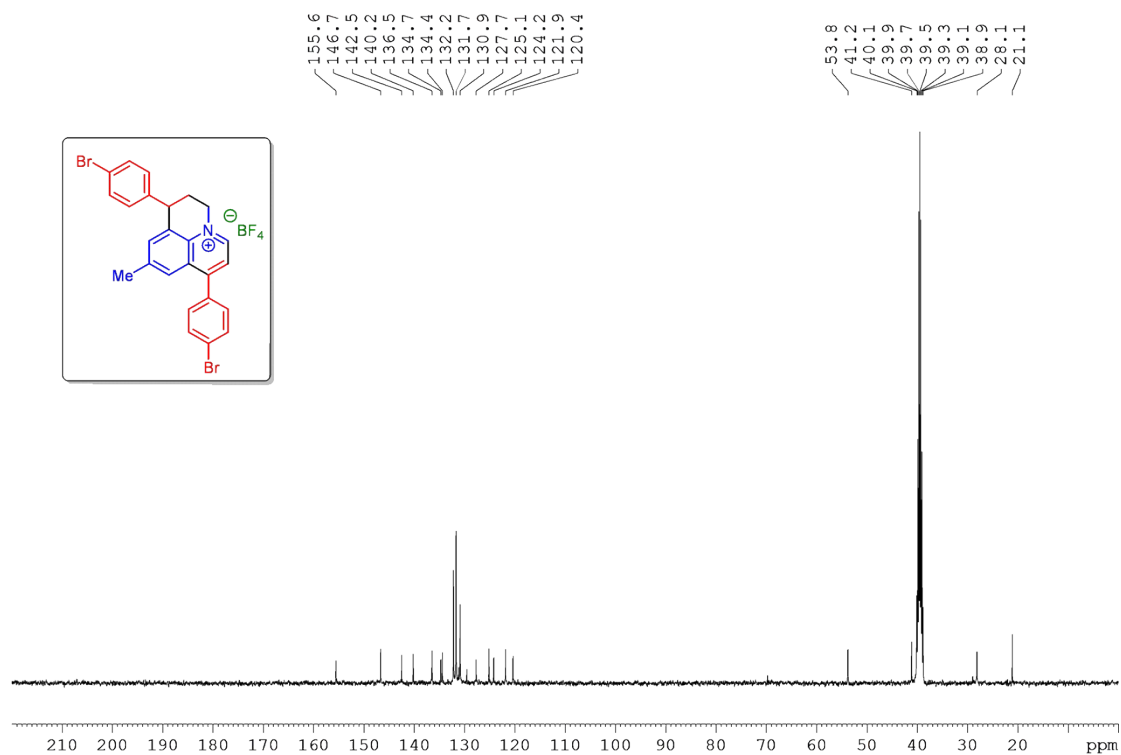

$^1\text{H}$  and  $^{13}\text{C}$  NMR spectra of compound **3ad**

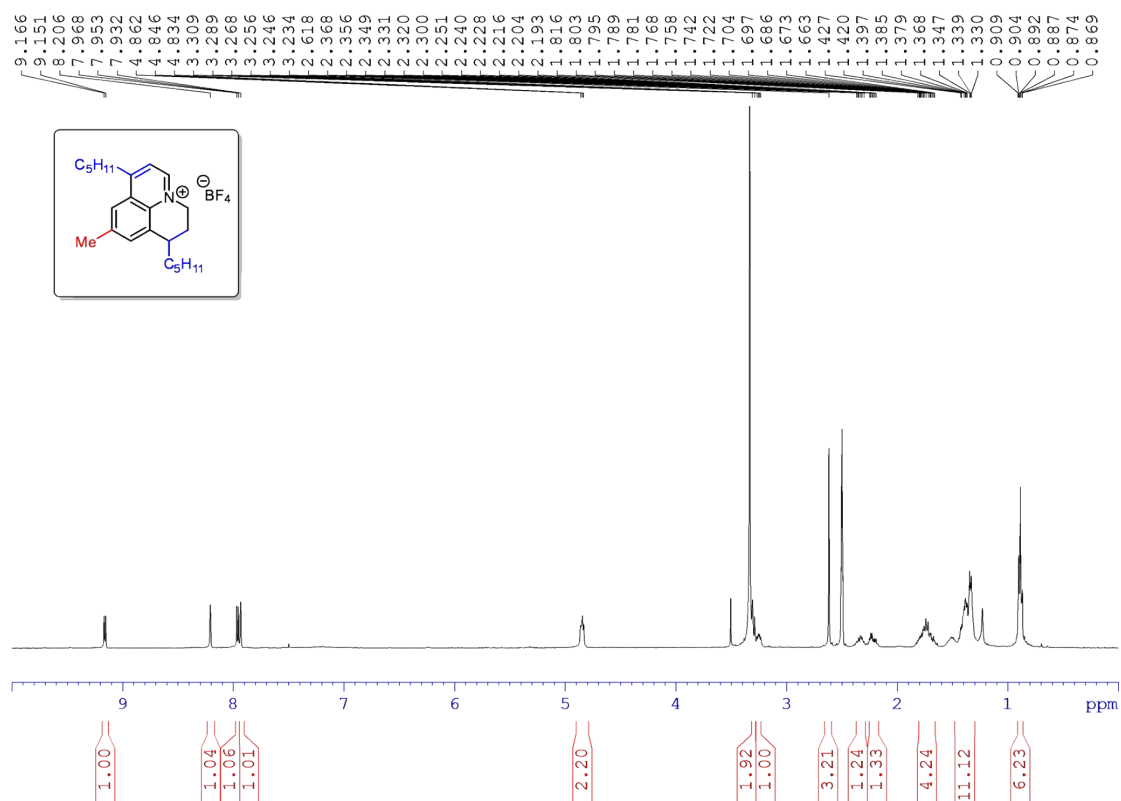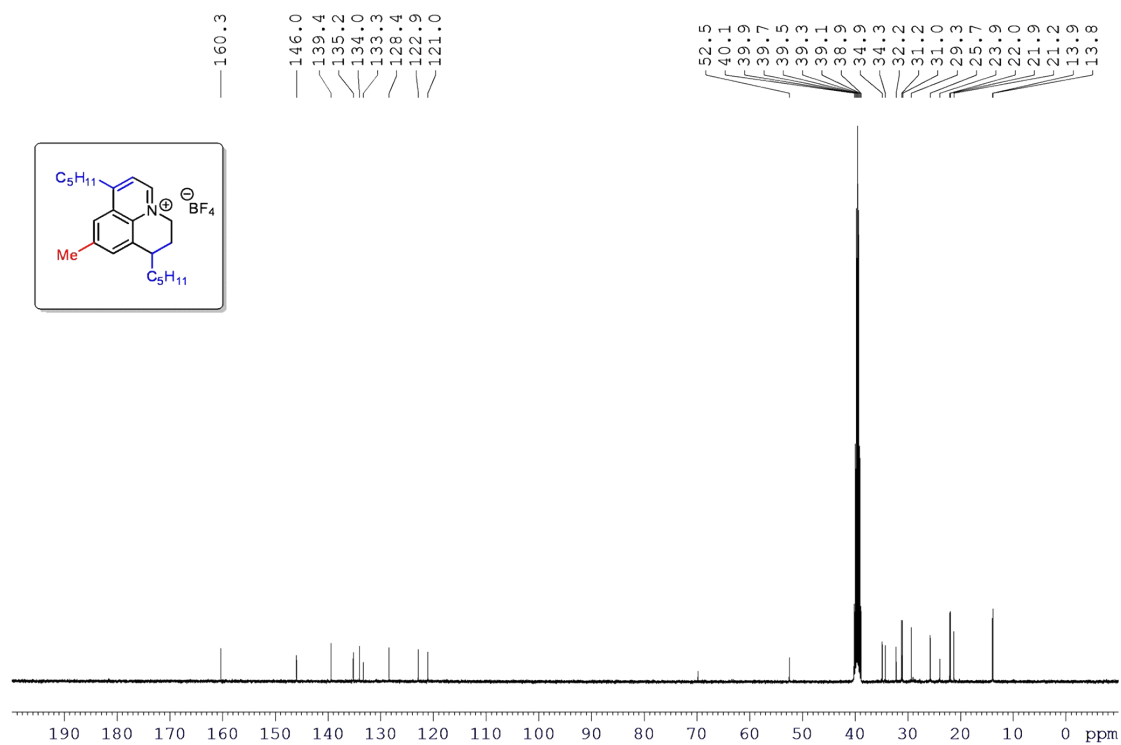

$^1\text{H}$  and  $^{13}\text{C}$  NMR spectra of compound **3ae**

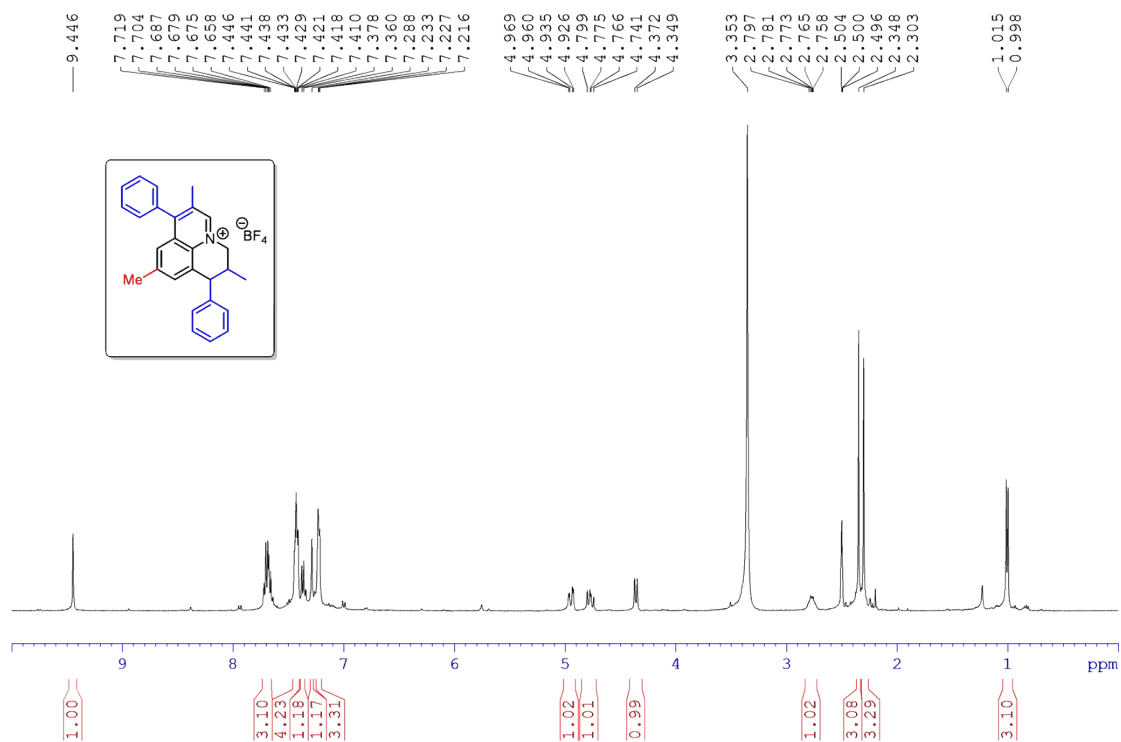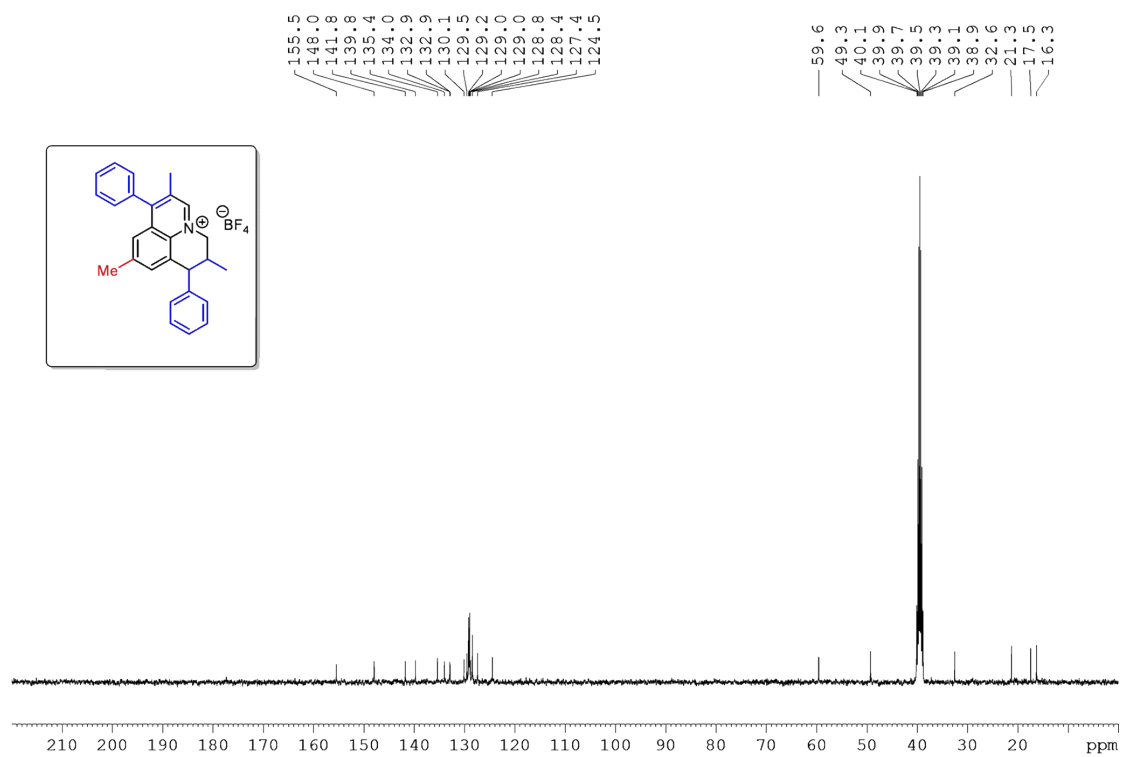



<sup>1</sup>H and <sup>13</sup>C NMR spectra of compound **3ag'**

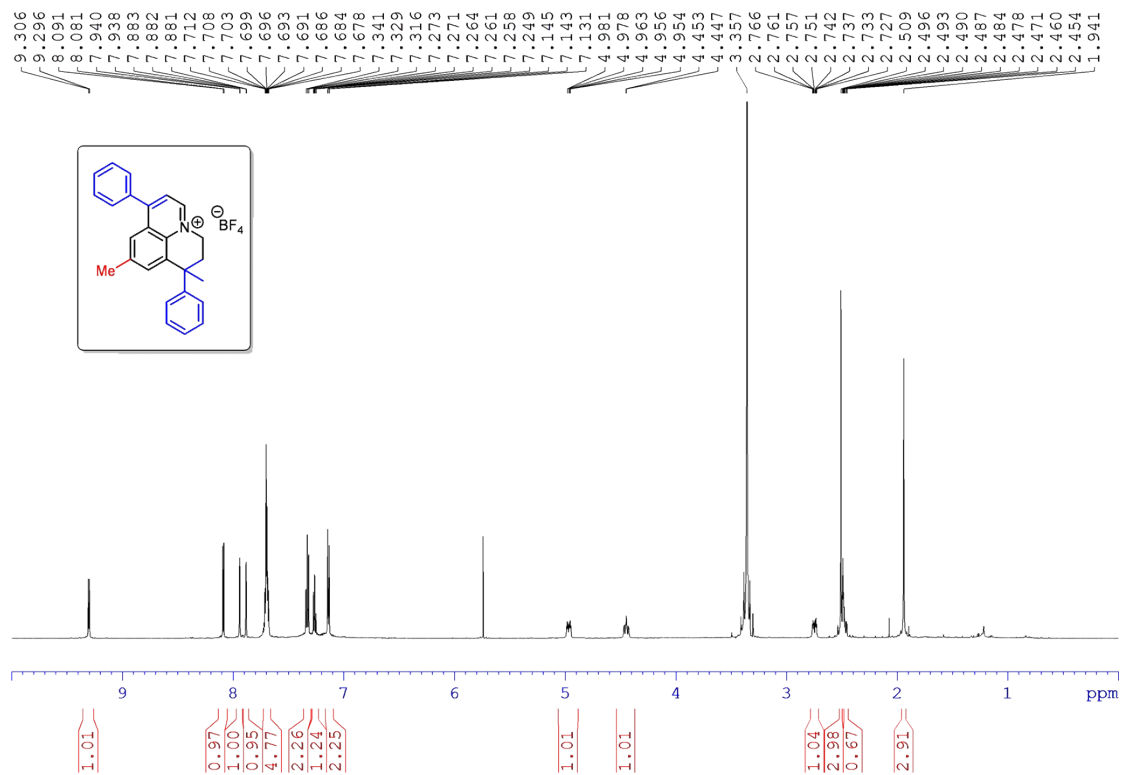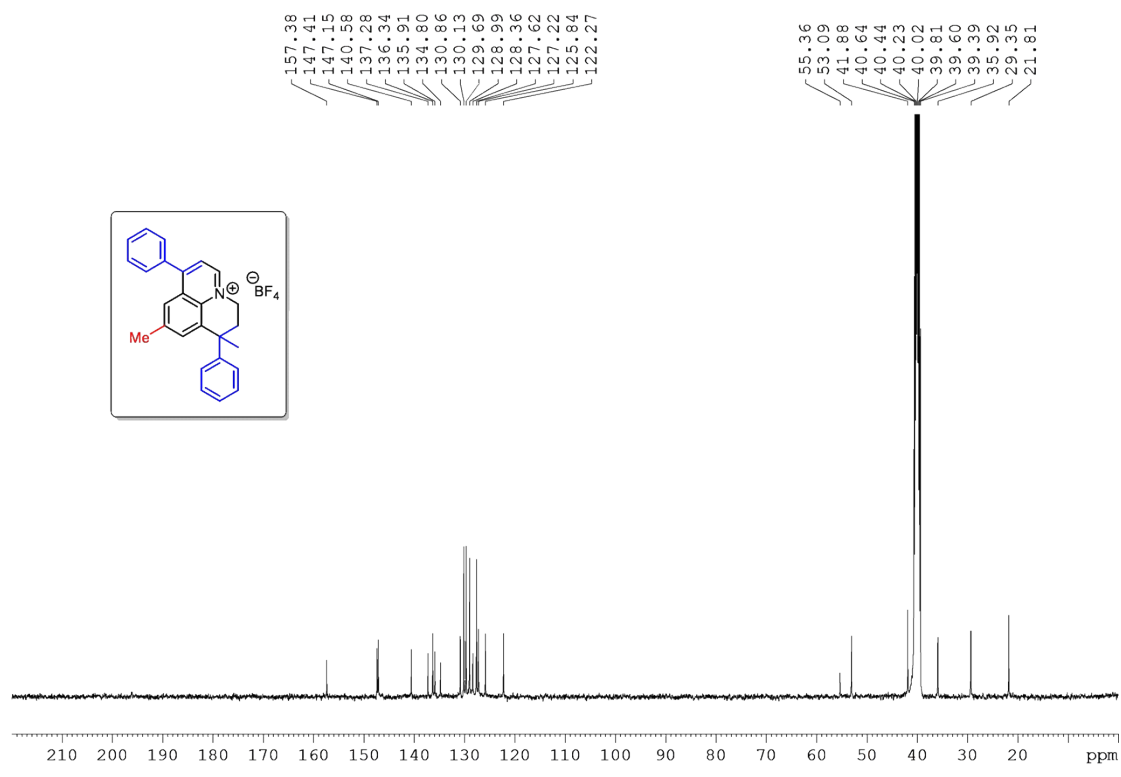

$^1\text{H}$  and  $^{13}\text{C}$  NMR spectra of compound **4ja**

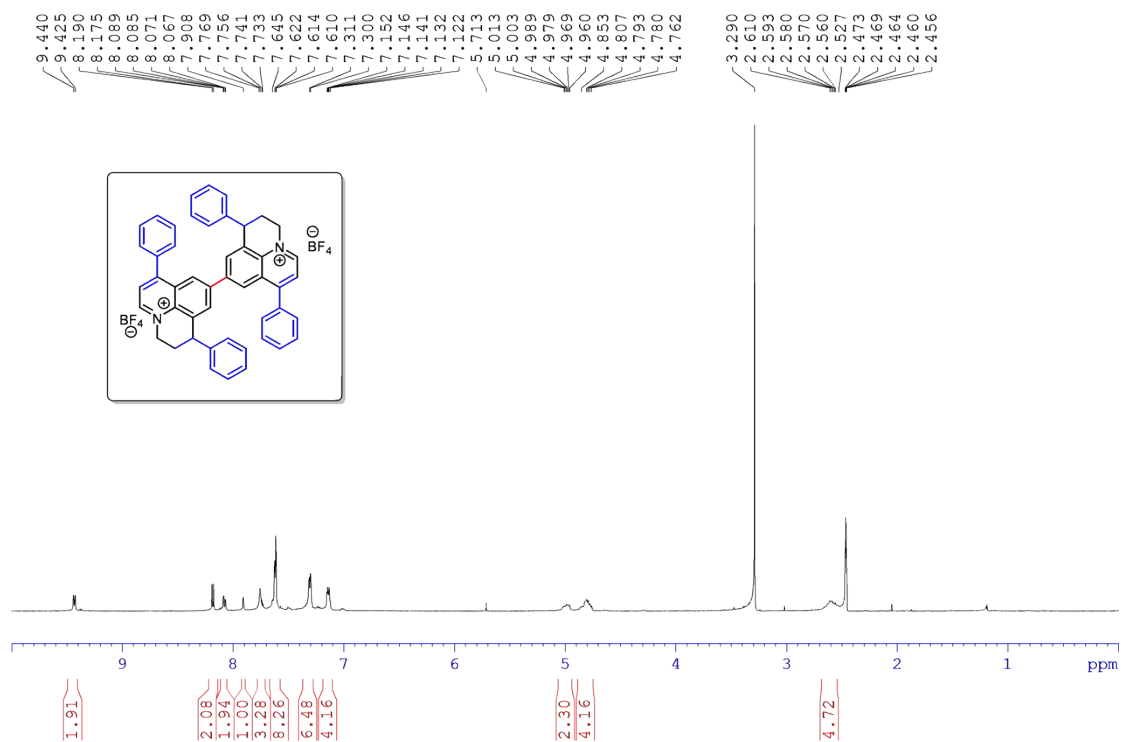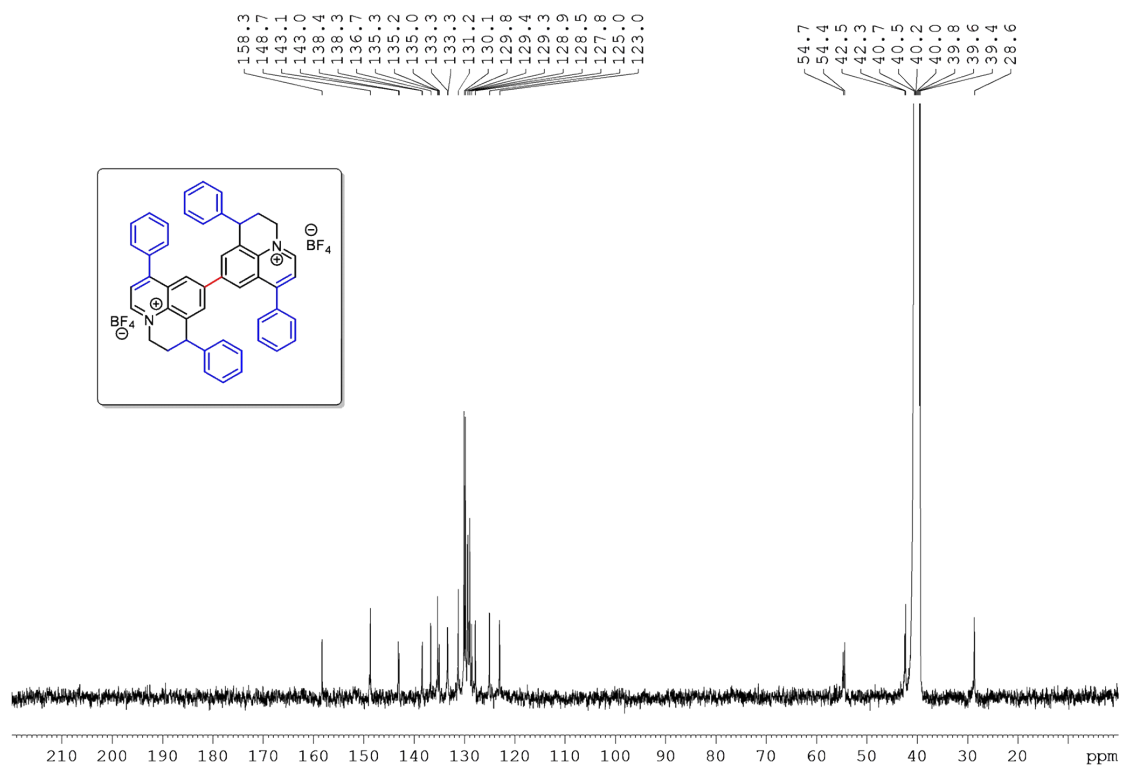



$^1\text{H}$  and  $^{13}\text{C}$  NMR spectra of compound **4jc**

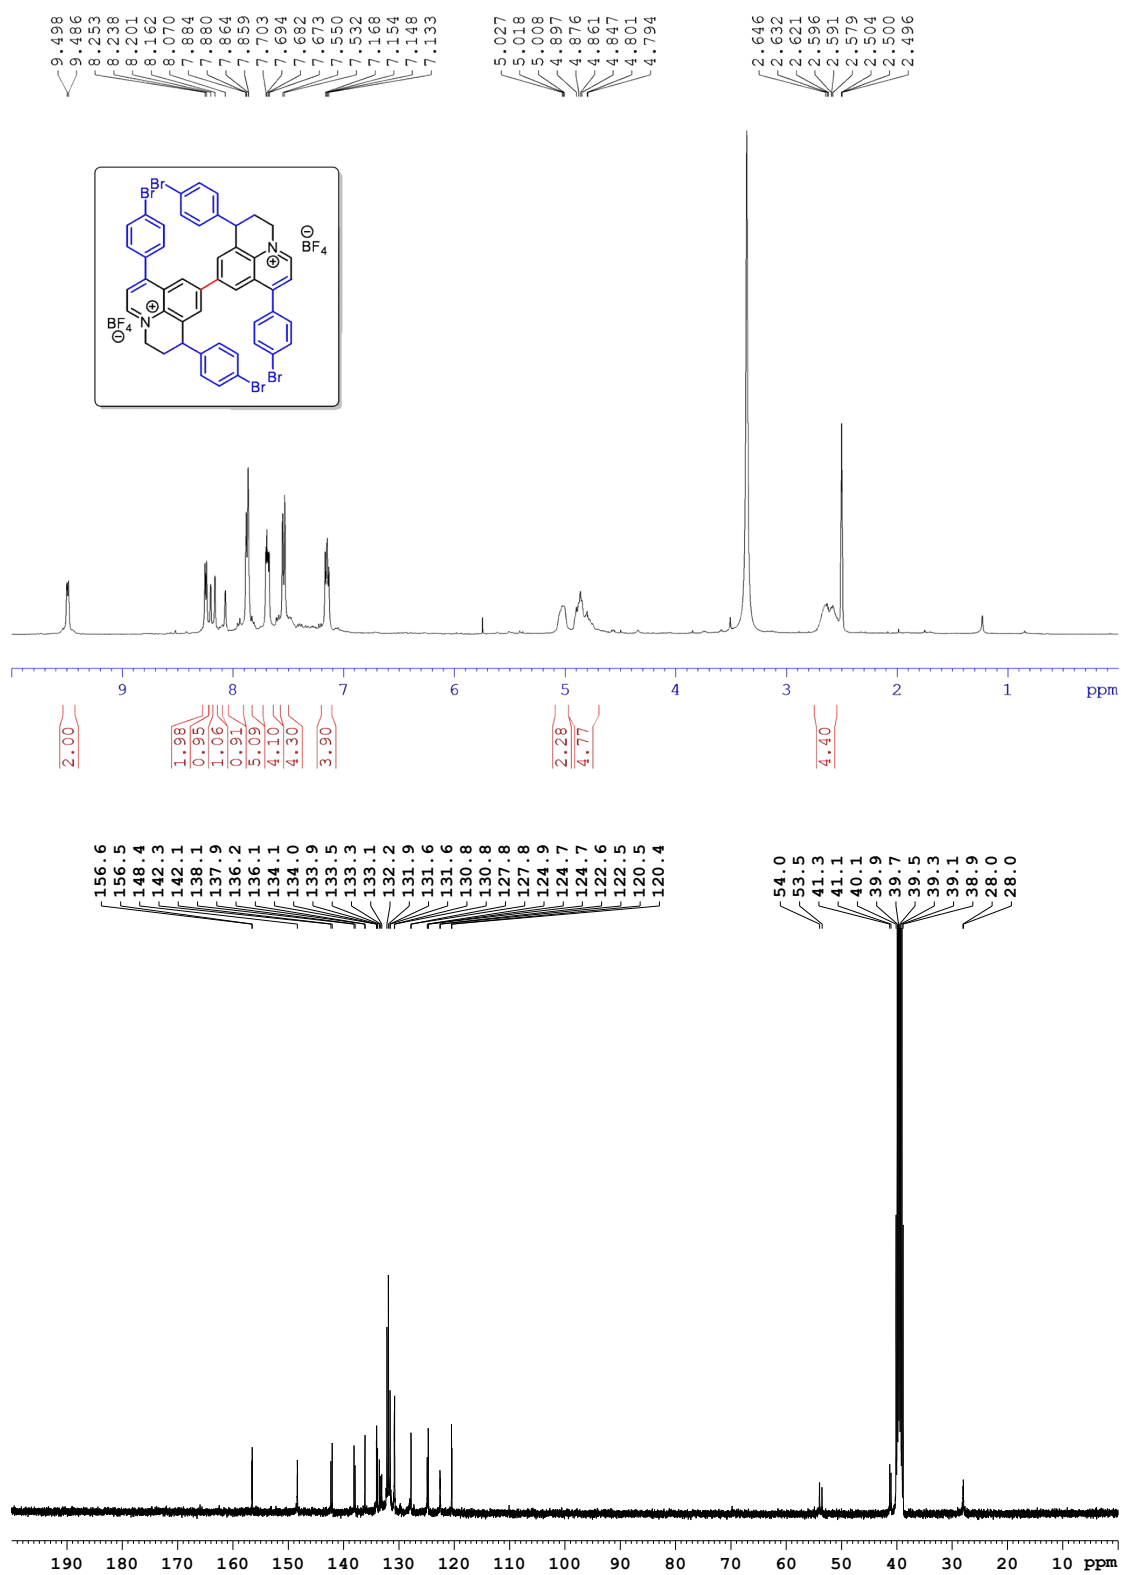

$^1\text{H}$  and  $^{13}\text{C}$  NMR spectra of compound **4jd**

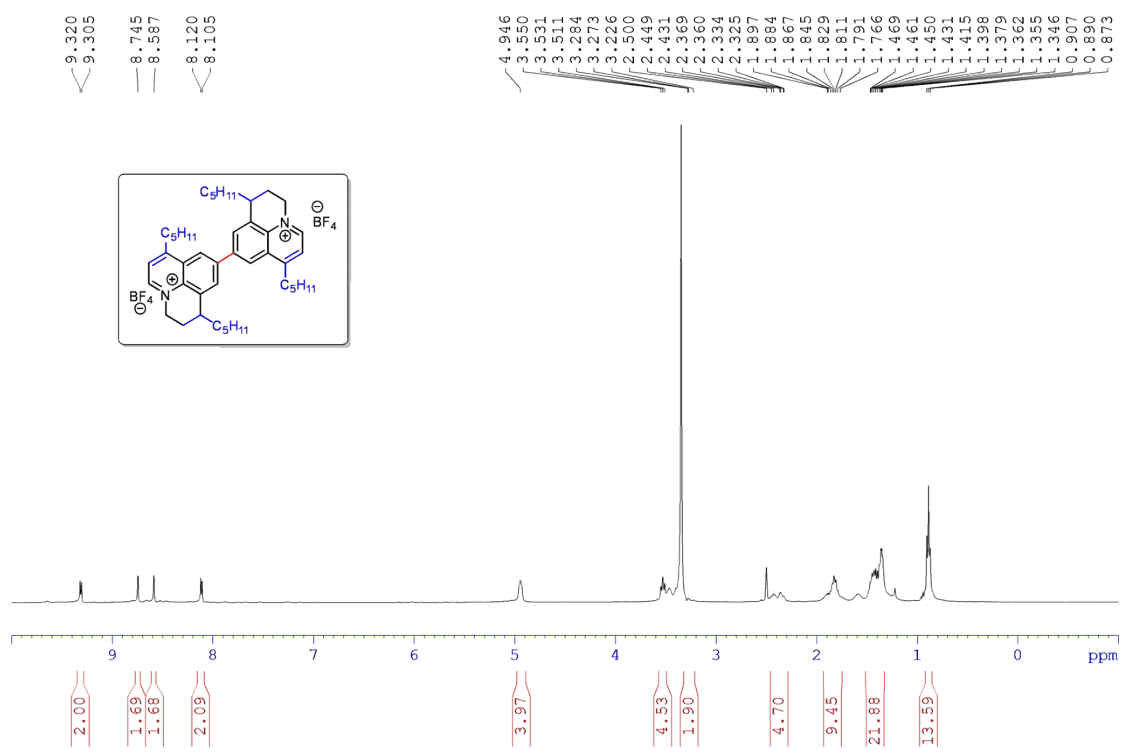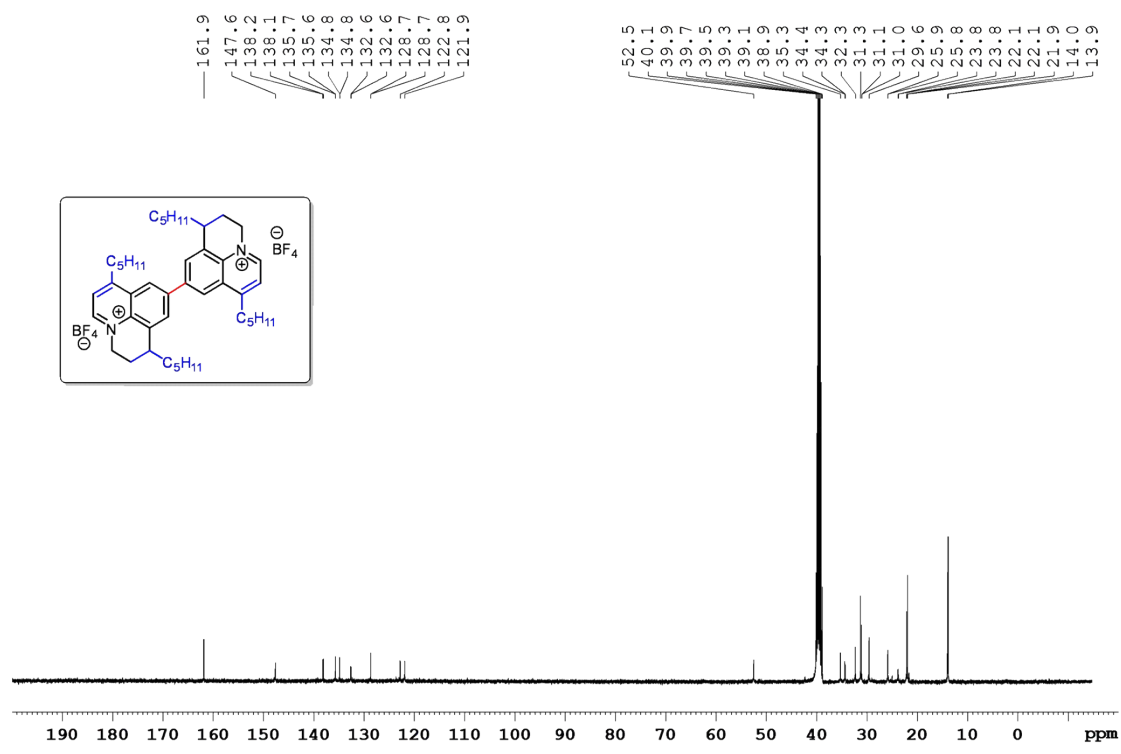

$^1\text{H}$  and  $^{13}\text{C}$  NMR spectra of compound **5ka**

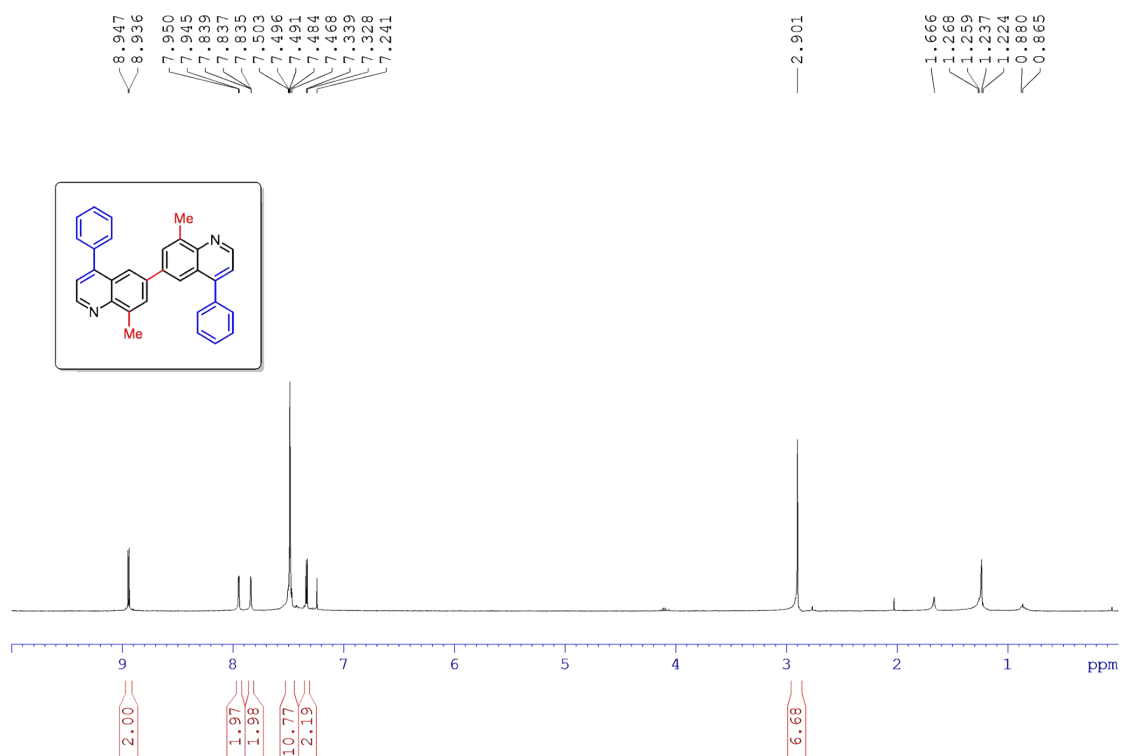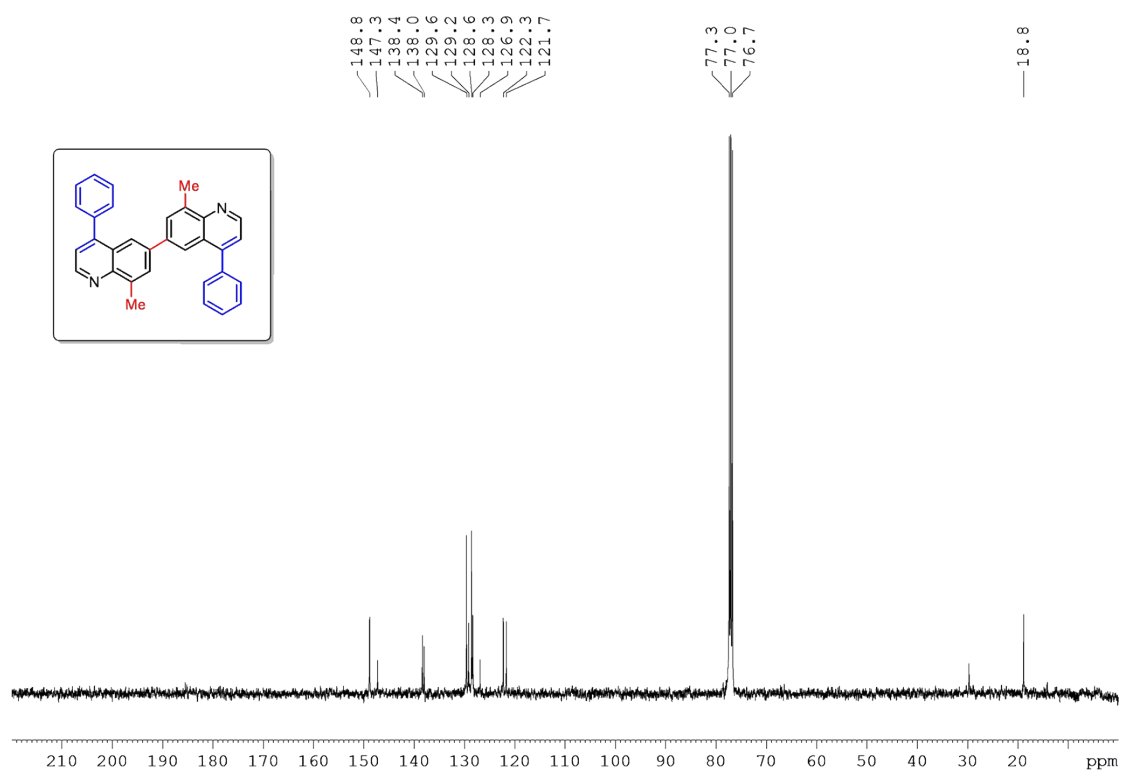

$^1\text{H}$  and  $^{13}\text{C}$  NMR spectra of compound **51a**

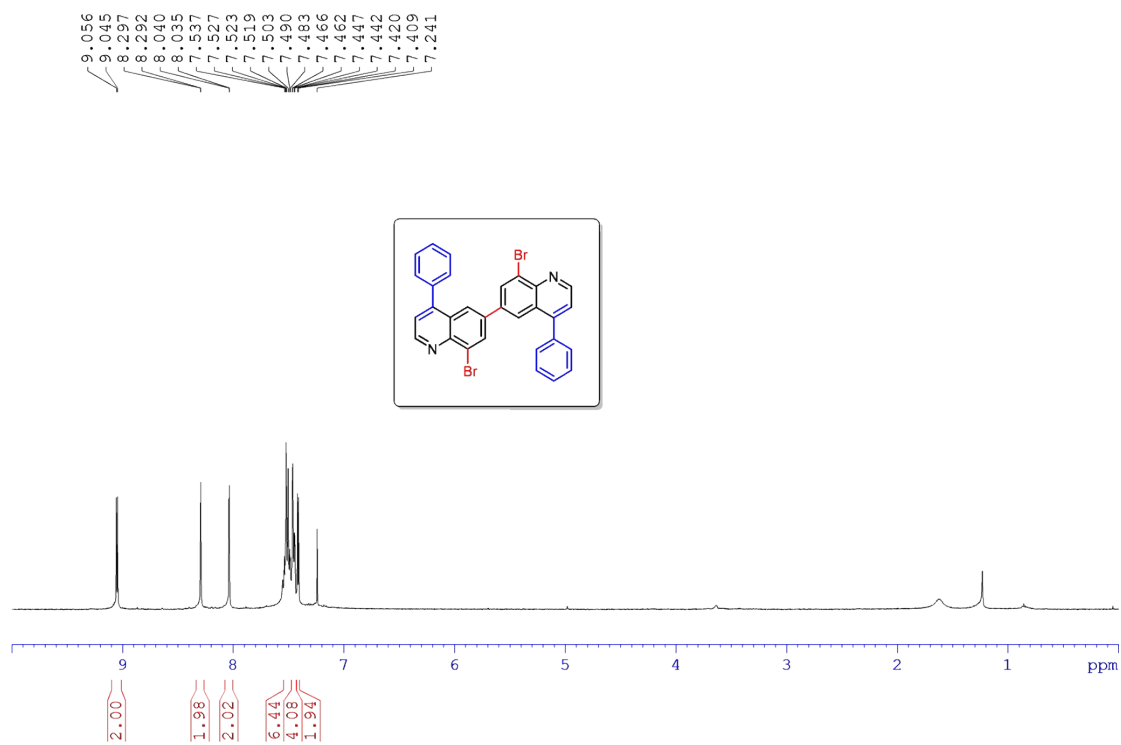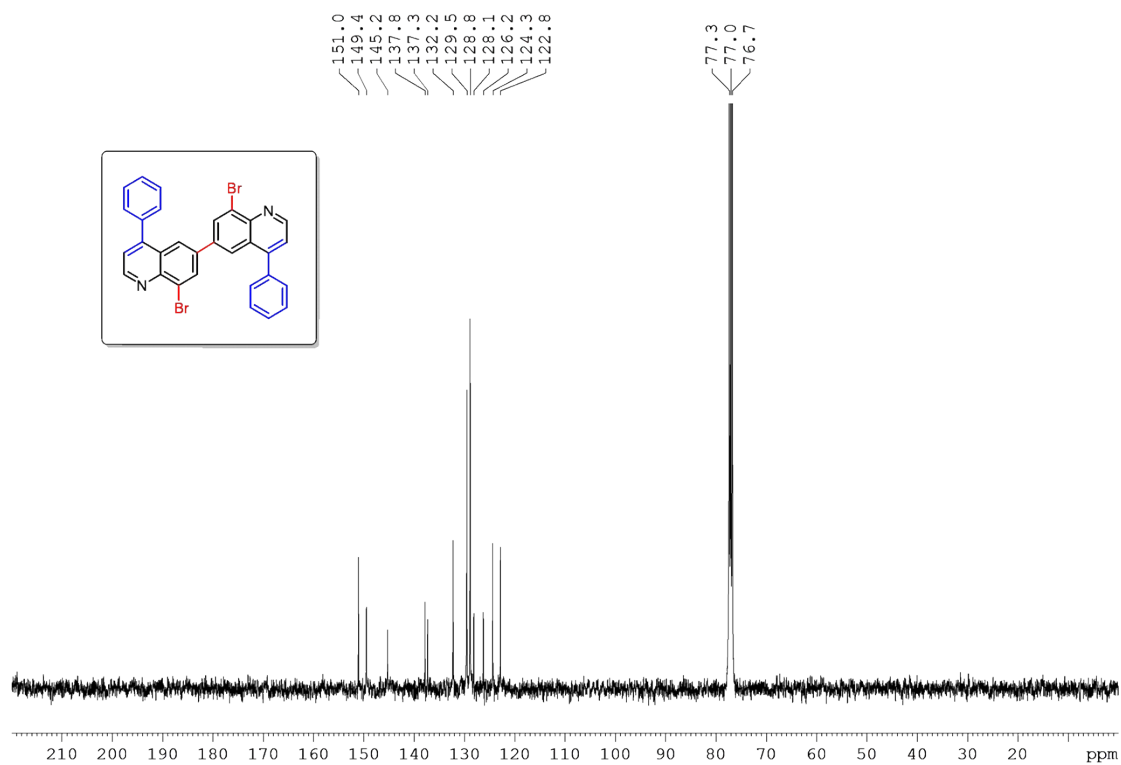

$^1\text{H}$  and  $^{13}\text{C}$  NMR spectra of compound **5kc**

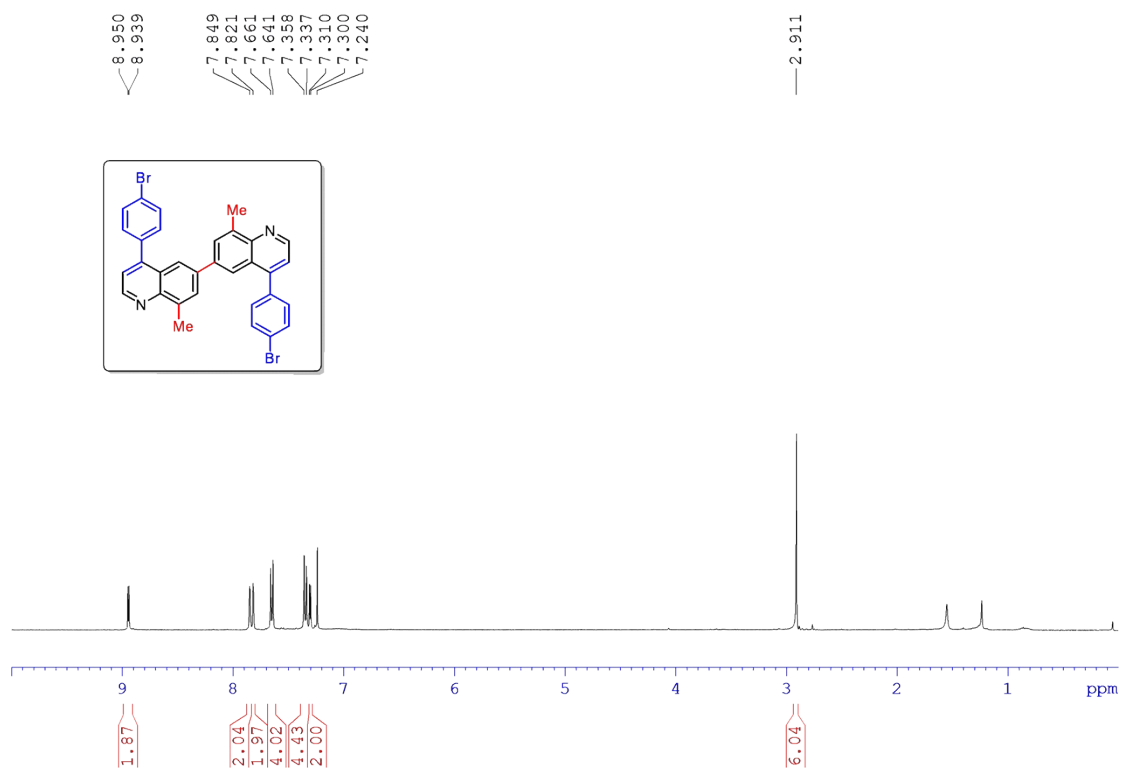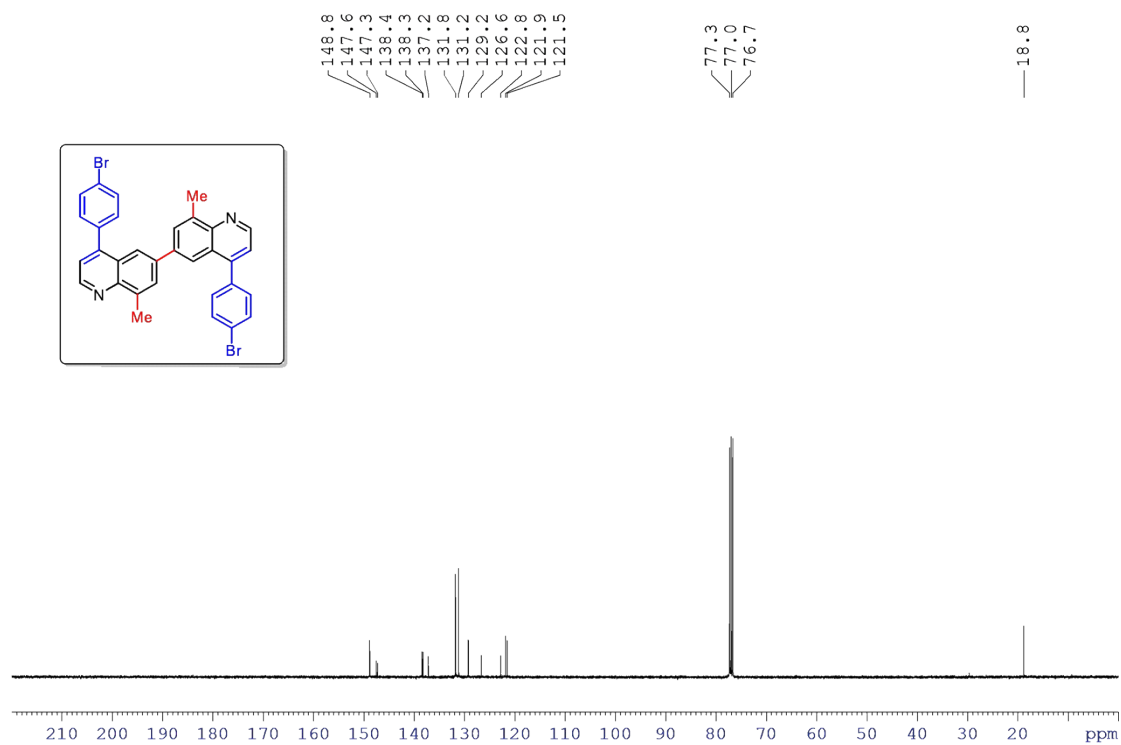

$^1\text{H}$  and  $^{13}\text{C}$  NMR spectra of compound **5kd**

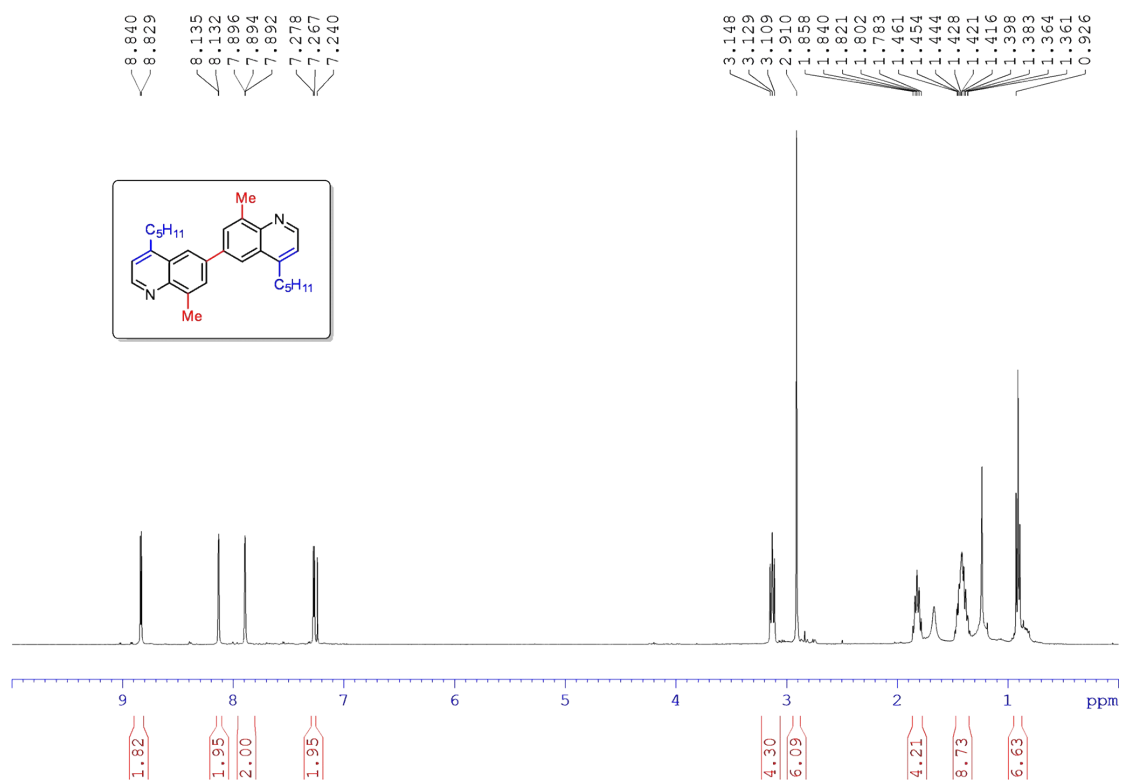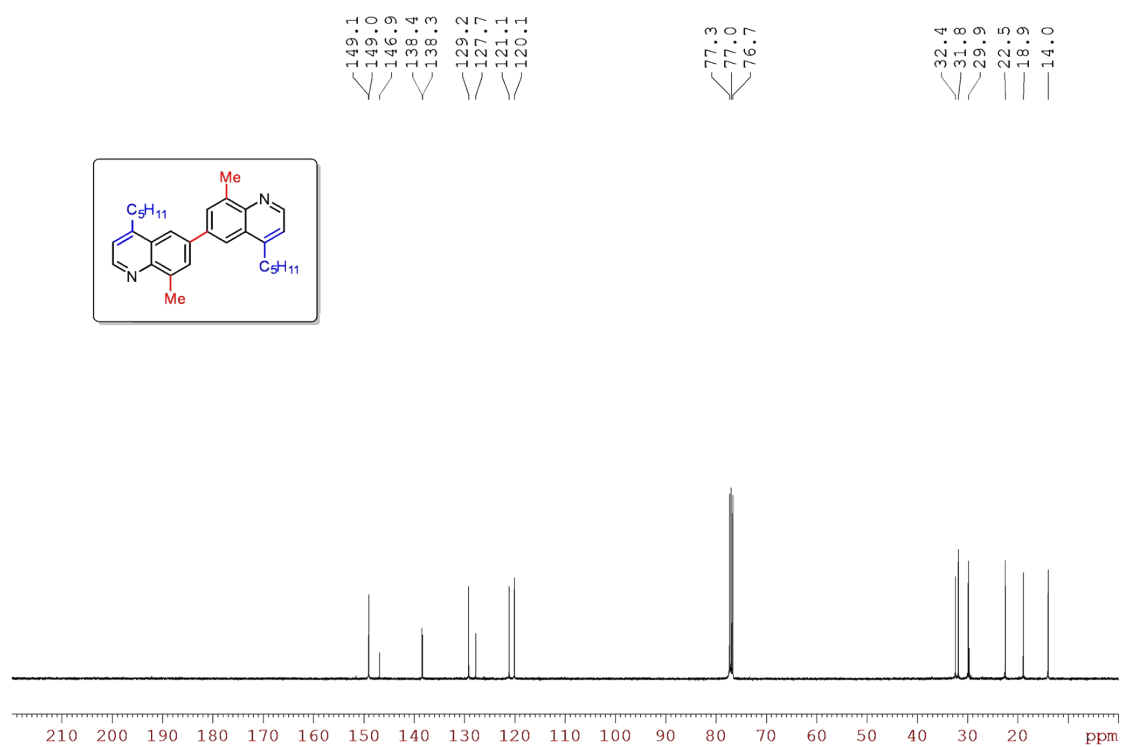

$^1\text{H}$  and  $^{13}\text{C}$  NMR spectra of compound **5ke**

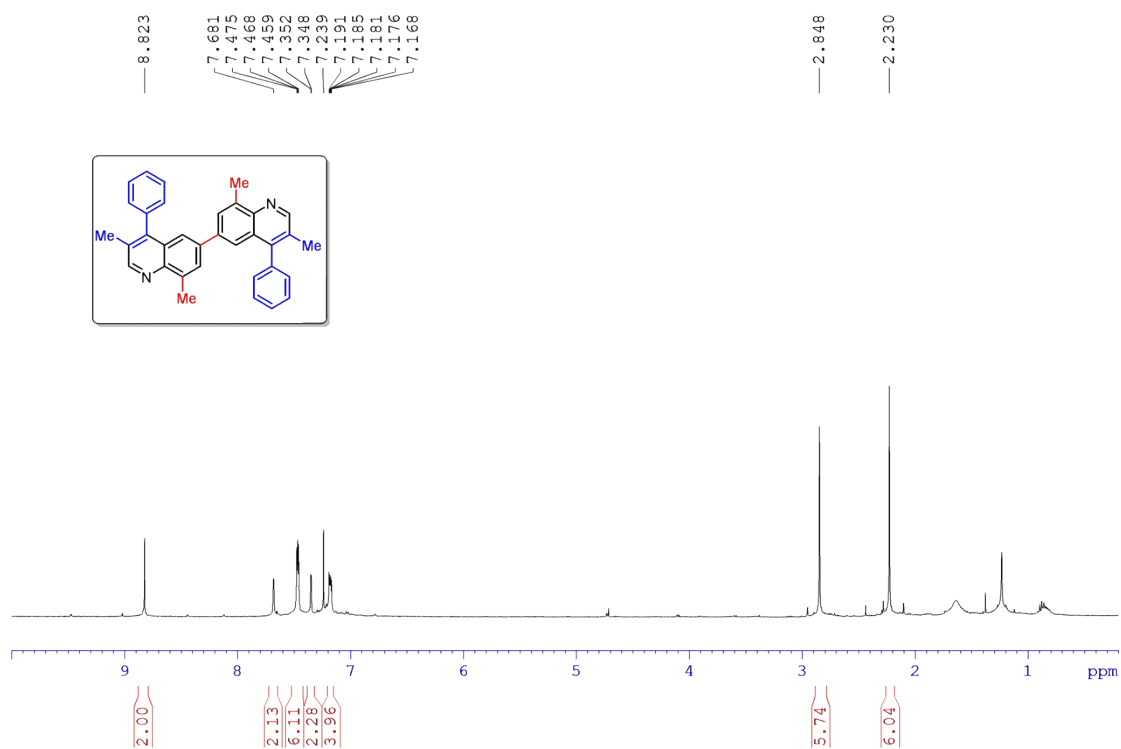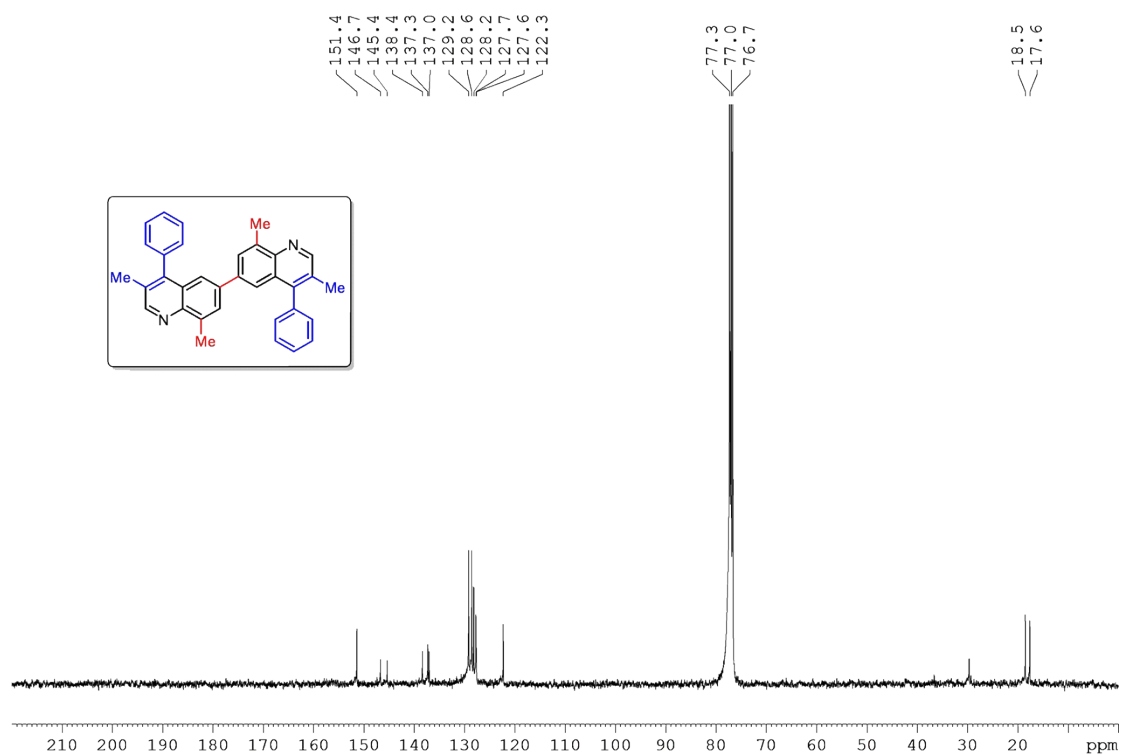

# $^1\text{H}$ and $^{13}\text{C}$ NMR spectra of compound **5kf**

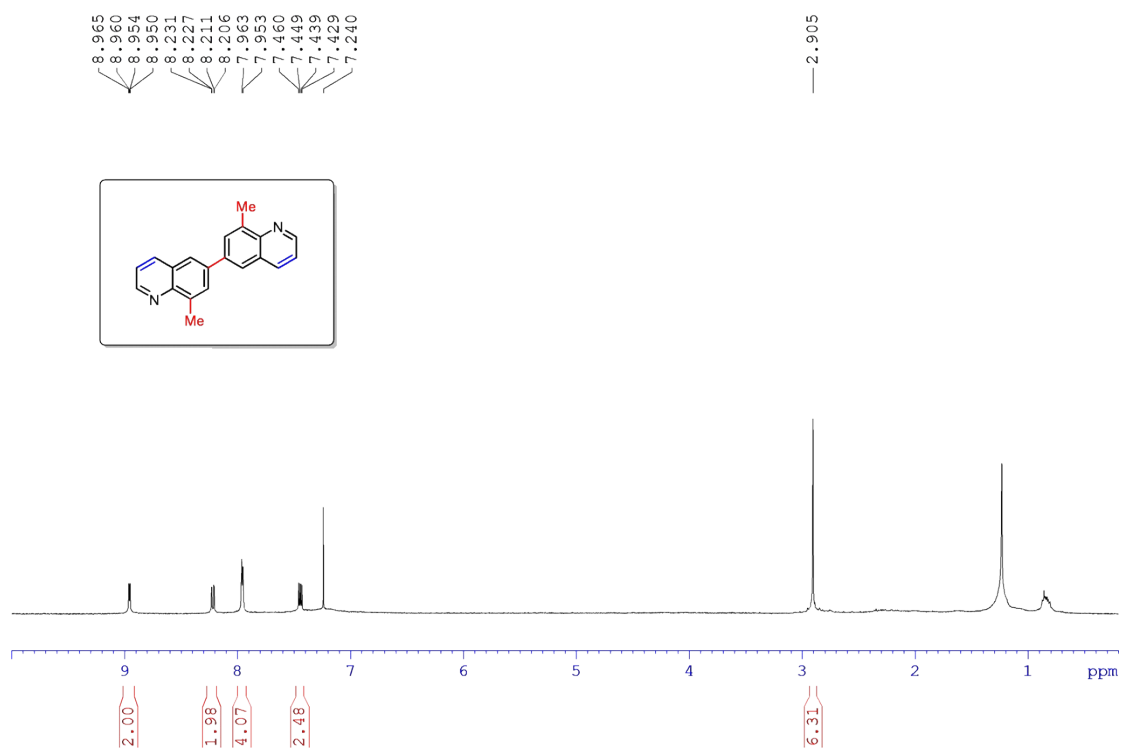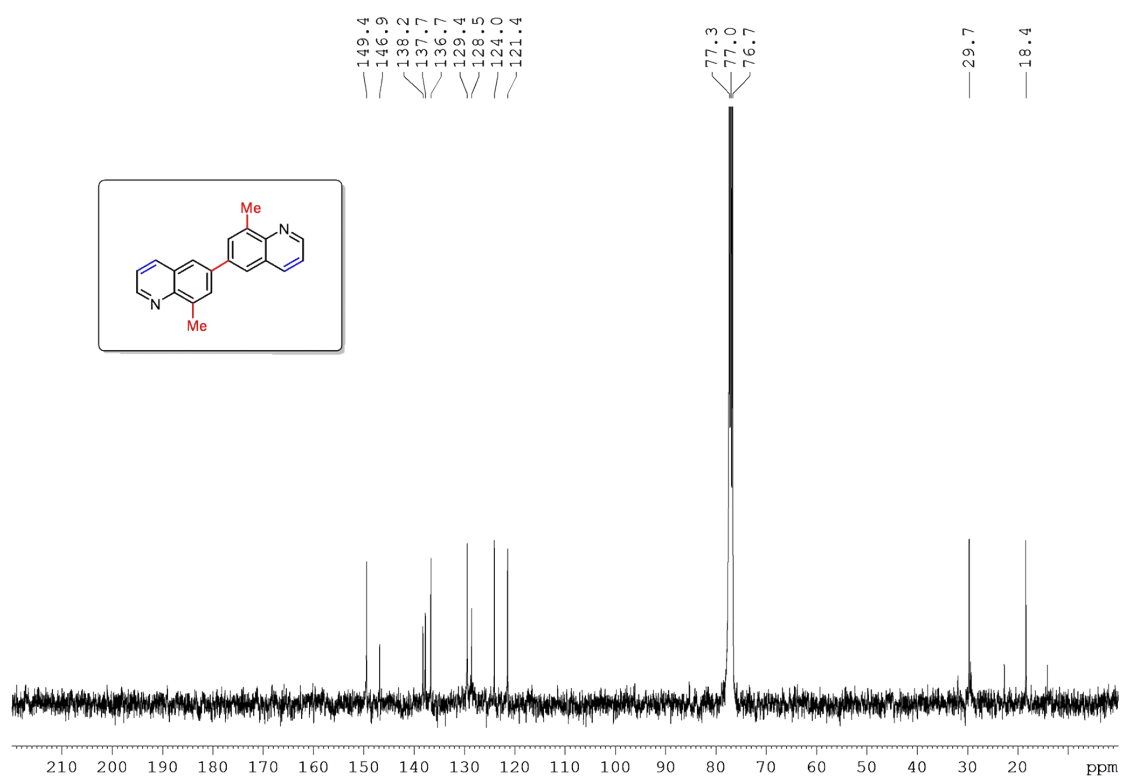



## X-ray Crystallographic Analysis:

ORTEP diagram of compound **3af**.

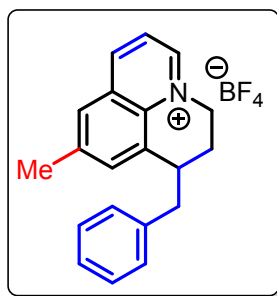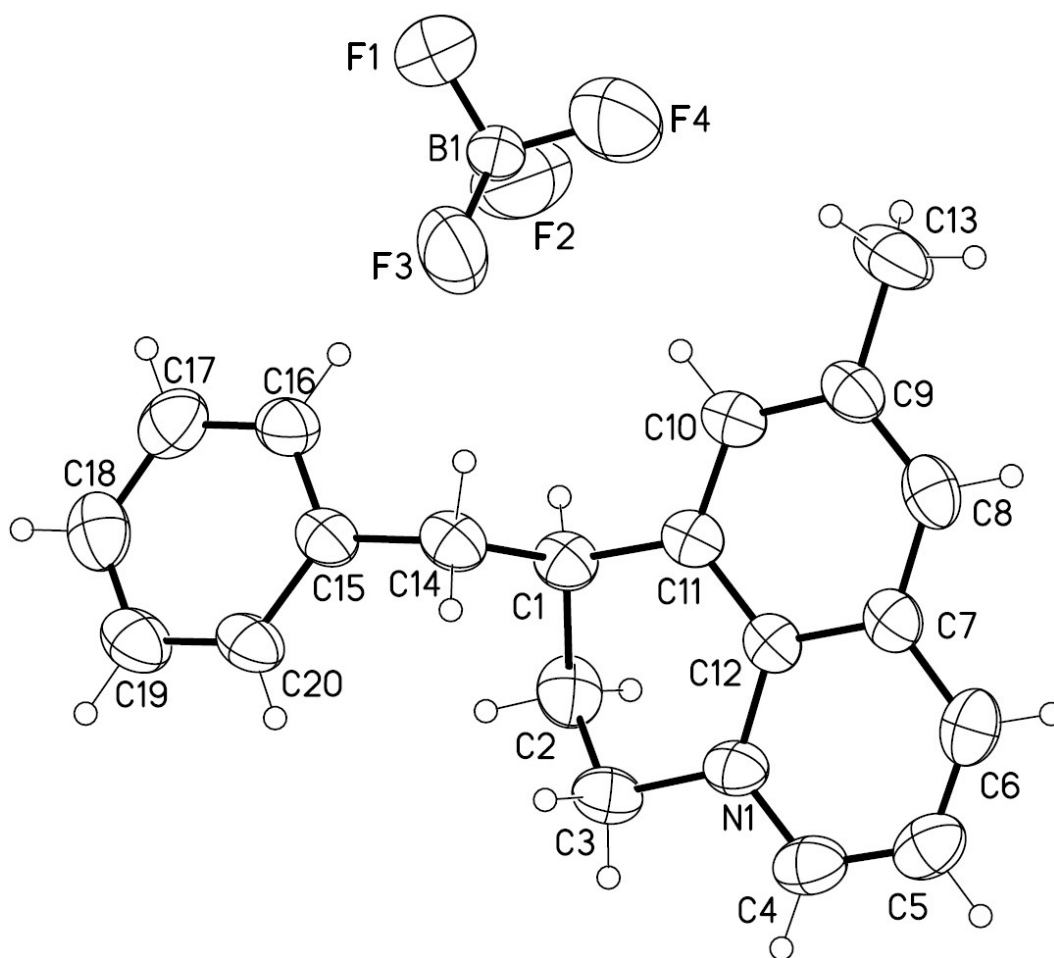

**Table S5.** Crystal data and structure refinement for MO\_150929\_0M, **3af**.

|                                   |                                             |                              |
|-----------------------------------|---------------------------------------------|------------------------------|
| Identification code               | mo_150929_0m                                |                              |
| Empirical formula                 | C20 H20 B F4 N                              |                              |
| Formula weight                    | 361.18                                      |                              |
| Temperature                       | 296(2) K                                    |                              |
| Wavelength                        | 0.71073 Å                                   |                              |
| Crystal system                    | Triclinic                                   |                              |
| Space group                       | P -1                                        |                              |
| Unit cell dimensions              | a = 9.0489(7) Å                             | $\alpha = 78.224(2)^\circ$ . |
|                                   | b = 10.2453(9) Å                            | $\beta = 65.746(2)^\circ$ .  |
|                                   | c = 10.8052(9) Å                            | $\gamma = 73.570(2)^\circ$ . |
| Volume                            | 871.59(13) Å <sup>3</sup>                   |                              |
| Z                                 | 2                                           |                              |
| Density (calculated)              | 1.376 Mg/m <sup>3</sup>                     |                              |
| Absorption coefficient            | 0.109 mm <sup>-1</sup>                      |                              |
| F(000)                            | 376                                         |                              |
| Crystal size                      | 0.12 x 0.10 x 0.04 mm <sup>3</sup>          |                              |
| Theta range for data collection   | 2.078 to 26.448°.                           |                              |
| Index ranges                      | -11 ≤ h ≤ 10, -6 ≤ k ≤ 12, -13 ≤ l ≤ 13     |                              |
| Reflections collected             | 12209                                       |                              |
| Independent reflections           | 3512 [R(int) = 0.0339]                      |                              |
| Completeness to theta = 25.242°   | 98.3 %                                      |                              |
| Absorption correction             | Semi-empirical from equivalents             |                              |
| Max. and min. transmission        | 0.9485 and 0.9064                           |                              |
| Refinement method                 | Full-matrix least-squares on F <sup>2</sup> |                              |
| Data / restraints / parameters    | 3512 / 255 / 283                            |                              |
| Goodness-of-fit on F <sup>2</sup> | 0.907                                       |                              |
| Final R indices [I > 2σ(I)]       | R1 = 0.0830, wR2 = 0.2507                   |                              |
| R indices (all data)              | R1 = 0.1773, wR2 = 0.2990                   |                              |
| Extinction coefficient            | 0.012(9)                                    |                              |
| Largest diff. peak and hole       | 0.365 and -0.542 e.Å <sup>-3</sup>          |                              |

ORTEP diagram of compound **4ja**.

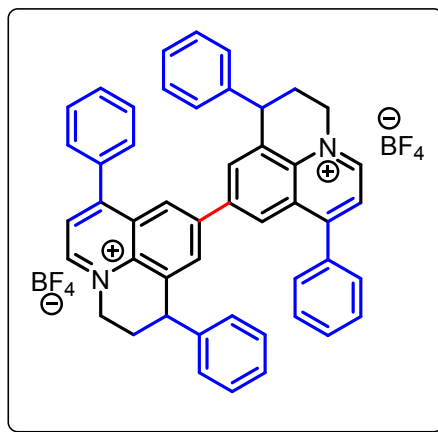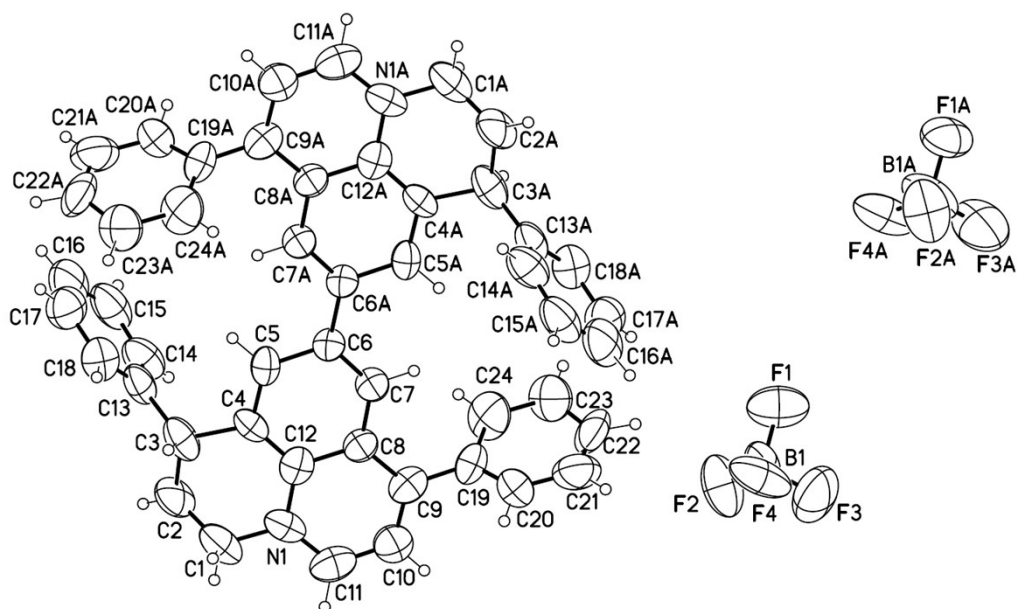

**Table S6.** Crystal data and structure refinement for 140445LT\_a, **4ja**.

|                                   |                                                                              |                  |
|-----------------------------------|------------------------------------------------------------------------------|------------------|
| Identification code               | 140445LT_a                                                                   |                  |
| Empirical formula                 | C <sub>48</sub> H <sub>36</sub> B <sub>2</sub> F <sub>8</sub> N <sub>2</sub> |                  |
| Formula weight                    | 814.41                                                                       |                  |
| Temperature                       | 100(2) K                                                                     |                  |
| Wavelength                        | 1.54178 Å                                                                    |                  |
| Crystal system                    | Monoclinic                                                                   |                  |
| Space group                       | P 21/c                                                                       |                  |
| Unit cell dimensions              | a = 13.2275(13) Å                                                            | α = 90°.         |
|                                   | b = 12.9049(11) Å                                                            | β = 110.482(6)°. |
|                                   | c = 12.2015(11) Å                                                            | γ = 90°.         |
| Volume                            | 1951.1(3) Å <sup>3</sup>                                                     |                  |
| Z                                 | 2                                                                            |                  |
| Density (calculated)              | 1.386 Mg/m <sup>3</sup>                                                      |                  |
| Absorption coefficient            | 0.897 mm <sup>-1</sup>                                                       |                  |
| F(000)                            | 840                                                                          |                  |
| Crystal size                      | 0.17 x 0.15 x 0.15 mm <sup>3</sup>                                           |                  |
| Theta range for data collection   | 3.567 to 66.746°.                                                            |                  |
| Index ranges                      | -15 ≤ h ≤ 15, -15 ≤ k ≤ 13, -14 ≤ l ≤ 14                                     |                  |
| Reflections collected             | 13094                                                                        |                  |
| Independent reflections           | 3356 [R(int) = 0.1157]                                                       |                  |
| Completeness to theta = 67.679°   | 95.0 %                                                                       |                  |
| Absorption correction             | Semi-empirical from equivalents                                              |                  |
| Max. and min. transmission        | 0.9492 and 0.6817                                                            |                  |
| Refinement method                 | Full-matrix least-squares on F <sup>2</sup>                                  |                  |
| Data / restraints / parameters    | 3356 / 0 / 271                                                               |                  |
| Goodness-of-fit on F <sup>2</sup> | 0.670                                                                        |                  |
| Final R indices [I > 2σ(I)]       | R1 = 0.0857, wR2 = 0.2190                                                    |                  |
| R indices (all data)              | R1 = 0.2009, wR2 = 0.2861                                                    |                  |

Extinction coefficient  
Largest diff. peak and hole

n/a  
0.270 and -0.166 e.Å<sup>-3</sup>

ORTEP diagram of compound **5ka**

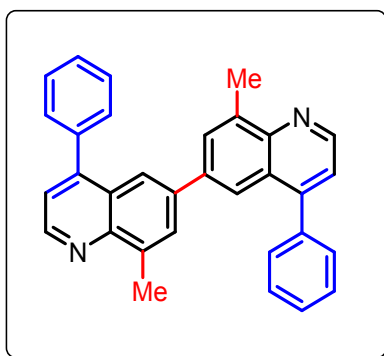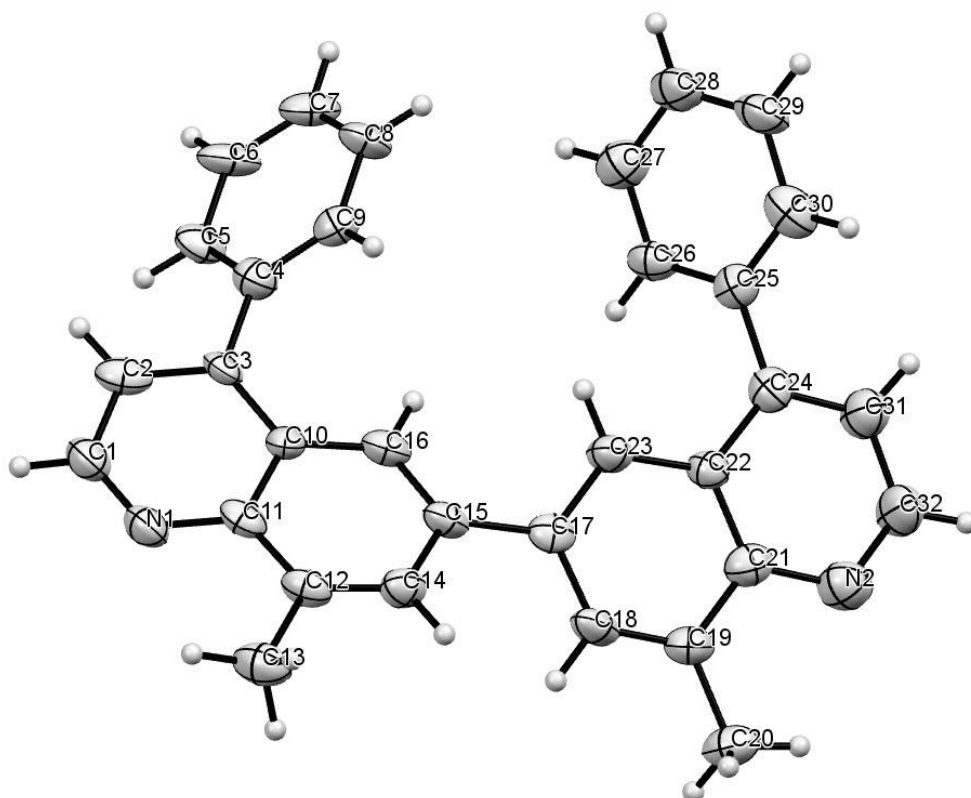

**Table S7.** Crystal data and structure refinement for a16581a, **5ka**.

|                                   |                                                |          |
|-----------------------------------|------------------------------------------------|----------|
| Identification code               | a16581a                                        |          |
| Empirical formula                 | C <sub>32</sub> H <sub>24</sub> N <sub>2</sub> |          |
| Formula weight                    | 436.53                                         |          |
| Temperature                       | 200(2) K                                       |          |
| Wavelength                        | 0.71073 Å                                      |          |
| Crystal system                    | Orthorhombic                                   |          |
| Space group                       | P b c a                                        |          |
| Unit cell dimensions              | a = 7.917(6) Å                                 | α = 90°. |
|                                   | b = 22.675(14) Å                               | β = 90°. |
|                                   | c = 25.49(2) Å                                 | γ = 90°. |
| Volume                            | 4577(6) Å <sup>3</sup>                         |          |
| Z                                 | 8                                              |          |
| Density (calculated)              | 1.267 Mg/m <sup>3</sup>                        |          |
| Absorption coefficient            | 0.074 mm <sup>-1</sup>                         |          |
| F(000)                            | 1840                                           |          |
| Crystal size                      | 0.25 x 0.23 x 0.02 mm <sup>3</sup>             |          |
| Theta range for data collection   | 1.97 to 25.05°.                                |          |
| Index ranges                      | -8 ≤ h ≤ 9, -26 ≤ k ≤ 17, -30 ≤ l ≤ 26         |          |
| Reflections collected             | 19221                                          |          |
| Independent reflections           | 4006 [R(int) = 0.1883]                         |          |
| Completeness to theta = 25.05°    | 98.6 %                                         |          |
| Absorption correction             | multi-scan                                     |          |
| Max. and min. transmission        | 0.9985 and 0.9818                              |          |
| Refinement method                 | Full-matrix least-squares on F <sup>2</sup>    |          |
| Data / restraints / parameters    | 4006 / 0 / 307                                 |          |
| Goodness-of-fit on F <sup>2</sup> | 0.915                                          |          |
| Final R indices [I > 2σ(I)]       | R1 = 0.0946, wR2 = 0.1475                      |          |
| R indices (all data)              | R1 = 0.3434, wR2 = 0.2222                      |          |
| Largest diff. peak and hole       | 0.261 and -0.249 e.Å <sup>-3</sup>             |          |
